# Supplementary material for: Air pollution particles hijack peroxidasin to disrupt immunosurveillance and promote lung cancer
Source: eLife journal article supplement (doi:10.7554/elife.75345), 2022-04-07
Supplement: supp [file elife-75345-supp-v1.zip]

Archive with 53 entries (53 files):
- elife_poa_e75345_Figure_1_figure_supplement_1.tif
- elife_poa_e75345_Figure_1_figure_supplement_2.tif
- elife_poa_e75345_Figure_1_figure_supplement_3.tif
- elife_poa_e75345_Figure_1_figure_supplement_4.tif
- elife_poa_e75345_Figure_1_figure_supplement_5.tif
- elife_poa_e75345_Figure_1_figure_supplement_6.tif
- elife_poa_e75345_Figure_1_figure_supplement_7.tif
- elife_poa_e75345_Figure_1_figure_supplement_8.tif
- elife_poa_e75345_Figure_1_figure_supplement_9.tif
- elife_poa_e75345_Figure_1_figure_supplement_10.tif
- elife_poa_e75345_Figure_2_figure_supplement_1.tif
- elife_poa_e75345_Figure_2_figure_supplement_2.tif
- elife_poa_e75345_Figure_2_figure_supplement_3.tif
- elife_poa_e75345_Figure_2_figure_supplement_4.tif
- elife_poa_e75345_Figure_2_figure_supplement_5.tif
- elife_poa_e75345_Figure_2_figure_supplement_6.tif
- elife_poa_e75345_Figure_2_figure_supplement_7.tif
- elife_poa_e75345_Figure_2_figure_supplement_8.tif
- elife_poa_e75345_Figure_2_figure_supplement_9.tif
- elife_poa_e75345_Figure_3_figure_supplement_1.tif
- elife_poa_e75345_Figure_3_figure_supplement_2.jpg
- elife_poa_e75345_Figure_3_figure_supplement_3.jpg
- elife_poa_e75345_Figure_3_figure_supplement_4.tif
- elife_poa_e75345_Figure_4_figure_supplement_1.jpg
- elife_poa_e75345_Figure_4_figure_supplement_2.tif
- elife_poa_e75345_Figure_4_figure_supplement_3.tif
- elife_poa_e75345_Figure_4_figure_supplement_4.tif
- elife_poa_e75345_Figure_4_figure_supplement_5.tif
- elife_poa_e75345_Figure_5_figure_supplement_1.tif
- elife_poa_e75345_Figure_5_figure_supplement_2.tif
- elife_poa_e75345_Figure_5_figure_supplement_3.tif
- elife_poa_e75345_Figure_5_figure_supplement_4.tif
- elife_poa_e75345_Figure_5_figure_supplement_5.tif
- elife_poa_e75345_Figure_5_figure_supplement_6.tif
- elife_poa_e75345_Figure_5_figure_supplement_7.jpg
- elife_poa_e75345_Figure_5_figure_supplement_8.tif
- elife_poa_e75345_Supplementary_file_1.docx
- elife_poa_e75345_Figure_2_video_1.avi
- elife_poa_e75345_Figure_2_video_2.avi
- elife_poa_e75345_Figure_2_video_3.avi
- elife_poa_e75345_Figure_2_video_4.avi
- elife_poa_e75345_Figure_2_video_5.avi
- elife_poa_e75345_Figure_2_video_6.avi
- elife_poa_e75345_Figure_2_video_7.avi
- elife_poa_e75345_Figure_1_source_data_1.xlsx
- elife_poa_e75345_Figure_1_source_data_2.xlsx
- elife_poa_e75345_Figure_2_source_data_1.xlsx
- elife_poa_e75345_Figure_3_source_data_1.xlsx
- elife_poa_e75345_Figure_4_source_data_1.xlsx
- elife_poa_e75345_Figure_4_source_data_2.xlsx
- elife_poa_e75345_Figure_5_source_data_1.xlsx
- elife_poa_e75345_Source_data_1.zip
- elife_poa_e75345_Transparent_Reporting_File.pdf
