# Supplementary material for: Air pollution particles hijack peroxidasin to disrupt immunosurveillance and promote lung cancer
Source: eLife journal article supplement (doi:10.7554/elife.75345), 2022-04-07
Supplement: supp [file elife-75345-supp-v1.zip › elife_poa_e75345_Figure_1_source_data_1.xlsx]

## Sheet: Figure 1—source table 1
Figure 1—source table 1
Physicochemical characteristic of fine particulate matter collected from airborne pollution in 7 different locations, including Nanjing City (Qixia, Jiangning, Pukou, Gulou, and Gaochun) in Jiangsu Province, Suzhou City in Anhui Province and Tieling City in Liaoning Province (named as: QX, JN, PK, GL, GC, SZ and TL) and tobacco smoke particle (TSP), including the size distribution, zeta potential…
	QX	JN	PK	GL	GC	SZ	TL	TSP
Size (nm)	207.6±93.4	185.0±68.3	208.1±112.3	206.7±77.8	214.7±90.7	180.0±88.1	203.8±82.4	216.5±83.6
Potential (mV)	- (29.53±2.97)	- (29.77±0.25)	- (35.1±2.17)	- (36.7±1.15)	- (39.23±0.45)	- (35.1±2.17)	- (37.73±0.71)	- (16.3±1.59)
Top 15 Element Compositions (%)	N (16.8100)	N (12.2000)	N (18.5900)	Ca (13.6875)	C (8.8390)	C (8.8420)	C (23.1900)	C (48.7700)
	Ca (14.625)	C (8.6310)	C (11.9600)	N (11.8800)	N (6.4650)	N (3.4100)	S (5.8280)	N (6.9490)
	Al (8.6875)	H (4.3630)	S (6.5530)	C (9.3640)	Ca (4.6422)	Ca (3.0000)	N (5.2780)	H (6.9240)
	C (7.7410)	S (4.2000)	H (6.4900)	Al (5.1875)	H (4.3440)	S (2.4500)	H (4.5260)	Ca (2.1837)
	S (6.1480)	Ca (3.3000)	Ca (6.4438)	S (4.0600)	S (4.3410)	H (2.2150)	Ca (1.5625)	S (1.1760)
	H (5.5500)	Al (0.9375)	B (1.1880)	H (3.8680)	Al (3.7203)	K (1.1563)	K (1.5250)	Al (0.2218)
	Mg (3.0625)	Fe (0.4181)	Zn (1.0438)	B (2.0938)	B (1.6016)	Ba (0.1813)	B (0.3938)	B (0.1663)
	B (3.0000)	K (0.3438)	K (0.7438)	Mg (1.6250)	Mg (1.1470)	Cu (0.1266)	Zn (0.3375)	K (0.1365)
	Na (1.1188)	B (0.2125)	Na (0.7188)	K (0.8625)	K (0.7375)	Zn (0.1000)	Al (0.2563)	Mg (0.0921)
	K (1.0000)	Zn (0.1125)	Fe (0.3843)	Fe (0.3938)	Fe (0.4788)	Al (0.0750)	Ba (0.2438)	Zn (0.0145)
	Fe (0.7188)	Pb (0.0363)	Cu (0.2211)	Zn (0.2438)	Zn (0.4594)	Fe (0.0575)	Cu (0.1179)	Cu (0.0067)
	Zn (0.4375)	Mg (0.0356)	Ba (0.1063)	Na (0.1375)	Na (0.3172)	Pb (0.0231)	Fe (0.1125)	Cd (0.0039)
	Ba (0.3938)	Sr (0.0331)	Al (0.0688)	As (0.0863)	Cu (0.1004)	Ti (0.0201)	Na (0.1000)	Sr (0.0034)
	As (0.1425)	Mn (0.0258)	Pb (0.0519)	Pb (0.0744)	As (0.0572)	Mn (0.0102)	Ti (0.0388)	As (0.0031)
	Cu (0.0934)	Cu (0.0133)	Mn (0.0252)	Cu (0.0738)	Pb (0.0520)	Sr (0.0100)	Pb (0.0231)	Fe (0.0026)
