# Supplementary material for: Air pollution particles hijack peroxidasin to disrupt immunosurveillance and promote lung cancer
Source: eLife journal article supplement (doi:10.7554/elife.75345), 2022-04-07
Supplement: supp [file elife-75345-supp-v1.zip › elife_poa_e75345_Figure_1_source_data_2.xlsx]

## Sheet: 1C
Tumor Number
	PBS							PM1							TSP
LLC	1	3	1	2	2	1	3	6	8	10	9	8	11	7	4	8	7	3	4	4	5
AdCre	10	13	14	12	10	9	17	21	26	24	28	20	32	22	20	22	23	20	18	26	18
Dunnett's multiple comparisons test	Mean Diff.	95.00% CI of diff.	Significant?	Summary	Adjusted P Value
LLC
PBS vs. PM 1	-6.571	-9.712 to -3.431	Yes	***	0.0001
PBS vs. CSP	-3.143	-6.284 to -0.002176	Yes	*	0.0498
AdCre
PBS vs. PM 1	-12.57	-15.71 to -9.431	Yes	****	0.0001
PBS vs. CSP	-8.857	-12 to -5.716	Yes	****	0.0001
Tumor Burden (%)
	PBS							PM1							TSP
LLC	8.5986	10.2016	9.4001	6.4001	12.8009	15.6005		52.2548	73.0239	62.6393	52.6394	77.8316	65.2355		74.43	69.3436	53.2962	41.8868	51.3199	56.6033
AdCre	4.0698	3.9731	9.4001	4.02145	12.6866	5.35403		61.2258	57.4471	44.4903	39.3364	60.9687	65.1526		67.9238	64.86	52.33	36.3919	68.595	52.4935
Sidak's multiple comparisons test	Mean Diff.	95.00% CI of diff.	Significant?	Summary	Adjusted P Value
LLC
PBS vs. PM 1	-53.44	-64.9 to -41.98	Yes	****	<0.0001
PBS vs. CSP	-47.31	-58.77 to -35.85	Yes	****	<0.0001
AdCre
PBS vs. PM 1	-48.19	-59.64 to -36.73	Yes	****	<0.0001
PBS vs. CSP	-50.51	-61.97 to -39.06	Yes	****	<0.0001

## Sheet: 1D
Survival Percentage (%)
	LLC			AdCre
Days	PBS	PM 1	CSP	PBS	PM 1	CSP
19	1
22	1
23	1
27	1
35	1
38	1
47	1
55	1
15		1
15		1
17		1
18		1
22		1
28		1
31		1
31		1
37		1
15			1
18			1
21			1
25			1
31			1
42			1
46			1
74				1
89				1
97				1
99				1
104				1
109				1
114				1
56						1
61						1
63						1
82						1
86						1
86						1
90						1
56					1
59					1
59					1
63					1
72					1
80					1
82					1

## Sheet: 1F
Days after LLC injection
Days	PBS			PM 1			TSP
0	1.12	0.77	1.52	1.19	2.83	1.97	2.08	1.77	1.52
1	18.3	12.7	16.1	4.5	6.37	2.59	5.17	4.31	8.23
3	12.7	11.1	11.1	5.27	3.4	3.97	4.93	3.73	5.98
5	2.86	1.64	3.47	1.85	1.5	2.32	1.24	1.57	2.33
10	1.38	1.1	1.5	0.98	1.44	1.18	1.54	2.26	1.84
20	0.93	1.97	1.01	1	1.7	0.93	2.38	1.52	0.98
Dunnett's multiple comparisons test	Mean Diff.	95.00% CI of diff.	Significant?	Summary	Adjusted P Value
Row 1
PBS vs. PM 1	-0.86	-3.14 to 1.42	No	ns	0.5856
PBS vs. CSP	-0.6533	-2.933 to 1.626	No	ns	0.7277
Row 2
PBS vs. PM 1	11.21	8.934 to 13.49	Yes	****	0.0001
PBS vs. CSP	9.797	7.517 to 12.08	Yes	****	0.0001
Row 3
PBS vs. PM 1	7.42	5.14 to 9.7	Yes	****	0.0001
PBS vs. CSP	6.753	4.474 to 9.033	Yes	****	0.0001
Row 4
PBS vs. PM 1	0.7667	-1.513 to 3.046	No	ns	0.6498
PBS vs. CSP	0.9433	-1.336 to 3.223	No	ns	0.5295
Row 5
PBS vs. PM 1	0.1267	-2.153 to 2.406	No	ns	0.9875
PBS vs. CSP	-0.5533	-2.833 to 1.726	No	ns	0.7938
Row 6
PBS vs. PM 1	0.09333	-2.186 to 2.373	No	ns	0.9932
PBS vs. CSP	-0.3233	-2.603 to 1.956	No	ns	0.9225
Fold Change of CD 8+ T Cell
	PBS			PM 1			TSP
1 d	18.3	12.7	16.1	4.5	6.37	2.59	5.17	4.31	8.23
3 d	12.7	11.1	11.1	5.27	3.4	3.97	4.93	3.73	5.98
Dunnett's multiple comparisons test	Mean Diff.	95.00% CI of diff.	Significant?	Summary	Adjusted P Value
1 d
PBS vs. PM 1	11.21	6.981 to 15.45	Yes	***	0.0002
PBS vs. CSP	9.797	5.564 to 14.03	Yes	***	0.0005
3 d
PBS vs. PM 1	7.42	3.187 to 11.65	Yes	**	0.0029
PBS vs. CSP	6.753	2.521 to 10.99	Yes	**	0.005

## Sheet: 1G
IFN-γ+CD8+/CD3+CD45+ Cells
PBS	PM 1	TSP		Dunnett's multiple comparisons test	Mean Diff.	95.00% CI of diff.	Significant?	Summary	Adjusted P Value
9.76	1.69	3.39
9.07	1.08	3.03		PBS vs. PM 1	6.717	3.919 to 9.514	Yes	***	0.0008
6.64	2.55	1.45		PBS vs. CSP	5.867	3.069 to 8.664	Yes	**	0.0017

## Sheet: 1H
Spot Forming Units (SFU)
PBS	PM 1	CSP
1976	828	864.5
2061	839	1051
2086	538	678
2089	833.5	426
2051	481	888.25

## Sheet: IJ
Tumor Number
PBS	PM 1	CSP			Dunnett's multiple comparisons test	Mean Diff.	95.00% CI of diff.	Significant?	Summary	Adjusted P Value
28	24	31
26	27	24			PBS vs. PM 1	2.2	-2.993 to 7.393	No	ns	0.4849
25	29	28			PBS vs. CSP	-1.2	-6.393 to 3.993	No	ns	0.7908
32	24	35
27	23	26
Tumor Burden (%)
PBS	PM 1	CSP			Dunnett's multiple comparisons test	Mean Diff.	95.00% CI of diff.	Significant?	Summary	Adjusted P Value
55.1398	52.451	62.6908
72.9305	61.3464	67.1384			PBS vs. PM 1	1.909	-8.069 to 11.89	No	ns	0.8494
53.6922	58.795	56.9674			PBS vs. TSP	-0.931	-10.91 to 9.047	No	ns	0.961
54.0351	56.8987	64.9146
63.3113	60.0707	52.0529
