# Supplementary material for: Air pollution particles hijack peroxidasin to disrupt immunosurveillance and promote lung cancer
Source: eLife journal article supplement (doi:10.7554/elife.75345), 2022-04-07
Supplement: supp [file elife-75345-supp-v1.zip › elife_poa_e75345_Figure_2_source_data_1.xlsx]

## Sheet: 2D
	Displacement (μm)					Distance (μm)					Velocity (μm/s)
Time (s)	PBS	PM1	CSP		Time (s)	PBS	PM1	CSP		Time (s)	PBS	PM1	CSP
0	0	0	0		0	0	0	0		0	0	0	0
3	2.43545	0.27115	0.65302		3	0.883677	0.0537977	0.129513		3	1.4179	0.102037	0.245739
6	3.4501	0.34509	0.48505		6	1.24731	0.0737227	0.175341		6	0.397497	0.0369122	0.0841421
9	4.67628	0.31426	1.66055		9	1.54917	0.0836853	0.426396		9	1.13936	0.0202808	0.47598
12	4.67516	0.49688	1.65203		12	1.67869	0.123535	0.446321		12	0.48387	0.0731245	0.0365058
15	4.28095	0.73305	2.18866		15	2.03136	0.171356	0.569857		15	0.670365	0.0906997	0.233752
18	3.74085	0.91779	1.82266		18	2.68291	0.209213	0.68343		18	1.5422	0.0731245	0.212865
21	4.94989	1.02966	1.93292		21	2.97581	0.233123	0.737227		21	0.286086	0.0453499	0.103255
24	4.23105	1.0025	1.2271		24	3.38128	0.257033	0.878695		24	0.318843	0.0453499	0.265768
27	3.82653	1.06706	1.91335		27	3.5636	0.290906	1.02813		27	0.440121	0.0641345	0.285121
30	3.93497	1.18416	2.16922		30	3.94715	0.336734	1.08592		30	0.194398	0.0859499	0.109518
33	2.99018	1.10239	1.78036		33	4.22611	0.354666	1.20347		33	0.410375	0.0338446	0.221473
36	4.17888	1.28181	1.94358		36	4.51402	0.394516	1.25329		36	0.633091	0.0742091	0.0912649
39	4.36265	1.17499	2.40089		39	4.74515	0.416434	1.34295		39	0.743758	0.0401967	0.172091
42	5.11826	1.25566	1.95698		42	5.24727	0.452299	1.44457		42	0.811207	0.0680248	0.192404
45	4.78444	1.24848	1.95531		45	5.38375	0.470232	1.65577		45	0.221111	0.0340124	0.395482
48	4.40073	1.50049	2.06108		48	5.72746	0.520044	1.69164		48	0.652187	0.0962021	0.0680248
51	5.03824	1.62942	2.10345		51	5.9018	0.549932	1.75739		51	0.614406	0.0548434	0.125432
54	5.10597	1.77162	2.43199		54	5.97354	0.591774	1.92078		54	0.240375	0.0775605	0.310241
57	5.71812	1.84526	2.27653		57	6.1688	0.631625	1.97258		57	0.499109	0.0760545	0.0962021

## Sheet: 2J
Total Number of Junctions
PBS	PM1	CSP		Dunnett's multiple comparisons test	Mean Diff.	95.00% CI of diff.	Significant?	Summary	Adjusted P Value
261	562.5	507.5
232	431	401		PBS vs. PM1	-306.8	-565.3 to -48.32	Yes	*	0.0256
274	694	674		PBS vs. CSP	-271.8	-530.3 to -13.32	Yes	*	0.0414
Junctions density (%)
PBS	PM1	CSP		Dunnett's multiple comparisons test	Mean Diff.	95.00% CI of diff.	Significant?	Summary	Adjusted P Value
0.180162	0.349464	0.371436
0.158162	0.344035	0.283385		PBS vs. PM1	-0.2133	-0.3605 to -0.06612	Yes	*	0.0107
0.171673	0.456442	0.459488		PBS vs. CSP	-0.2014	-0.3486 to -0.05424	Yes	*	0.0139

## Sheet: 2E
Proportion of High Cross-link Col IV
PBS	PM1	TSP
23.8406	35.291	40.5214
23.4546	50.4195	39.7559
21.1641	36.6352	31.9107
26.8773	56.4519	33.1183
26.5917	38.2444	39.4139

## Sheet: 2M
	Displacement (μm)						Distance (μm)						Velocity (μm/s)
Time (s)	PM1		TSP			Time (s)	PM1		TSP			Time (s)	PM1		TSP
	PBS	Collagenase	PBS	Collagenase			PBS	Collagenase	PBS	Collagenase			PBS	Collagenase	PBS	Collagenase
0	0	0	0	0		0	0.706667	0	0	0		0	0	0	0	0
3	0.36154	0.34298	0.25565	3.52791		3	0.76	0.637	0.65	0.793		3	0.102037	0.40815	0.304217	0.456325
6	0.69656	2.71153	0.94492	3.18866		6	0.815556	1.261	0.88	1.417		6	0.0369122	1.19359	0.0304216	0.36506
9	1.7013	2.61209	0.66241	5.74046		9	1.26	1.898	1.52857	2.223		9	0.0202808	1.16819	0.155121	0.465363
12	0.34086	2.53205	0.62917	5.81828		12	1.85556	3.159	1.6	2.665		12	0.0731245	1.58809	0.261697	0.387205
15	0.444427	2.54231	0.79295	7.01959		15	2.39333	4.563	2.04286	3.783		15	0.0906997	0.36506	0.204075	0.645341
18	0.976073	2.9204	0.6792	3.56131		18	3.16444	4.563	2.45	3.939		18	0.0731245	0.608434	0.204075	0.273797
21	0.888853	4.88075	0.44151	4.01902		21	3.36444	5.46	2.64286	3.939		21	0.0453499	0.384807	0.18253	0.340022
24	1.38364	3.83468	0.54832	3.62743		24	4.15778	6.344	3.15	4.433		24	0.0453499	1.50518	0.395482	0.865817
27	1.38192	2.97253	0.12782	3.68053		27	4.59111	7.761	3.68571	4.797		27	0.0641345	0.36506	0.258136	0.612223
30	0.900897	3.42984	0.30045	3.4401		30	4.91333	7.761	3.89286	5.577		30	0.0859499	0.860455	0.192404	0.456325
33	1.29082	2.74139	0.50688	3.23898		33	5.04222	8.645	4.31429	6.084		33	0.0338446	0.950404	0.219374	0.288606
36	1.55887	3.18481	0.53396	4.17295		36	5.73556	9.542	4.49286	7.722		36	0.0742091	0.486746	0.219374	0.952835
39	1.45266	3.69051	0.211	4.03479		39	5.96445	10.426	4.81429	9.841		39	0.0401967	0.740191	0.0608433	1.22445
42	1.55887	4.5098	0.95075	4.72672		42	6.39778	11.323	5.17857	11.245		42	0.0680248	0.740191	0.13605	0.816299
45	1.54331	3.69405	0.73456	4.87483		45	6.47778	11.96	5.93571	11.752		45	0.0340124	1.00345	0.430228	0.288606
48	1.56944	4.21621	1.17291	3.58524		48	6.38	11.96	6.06429	12.883		48	0.0962021	0.425903	0.0860455	0.658122
51	1.88246	4.36547	1.17169	4.71102		51	6.612	13.364	6.3	13.728		51	0.0548434	0.438747	0.121687	0.491477
