# Supplementary material for: Air pollution particles hijack peroxidasin to disrupt immunosurveillance and promote lung cancer
Source: eLife journal article supplement (doi:10.7554/elife.75345), 2022-04-07
Supplement: supp [file elife-75345-supp-v1.zip › elife_poa_e75345_Figure_3_source_data_1.xlsx]

## Sheet: 3F
Total Number of Junctions
	PBS			PM1			TSP				Dunnett's multiple comparisons test	Mean Diff.	95.00% CI of diff.	Significant?	Summary	Adjusted P Value
PBS	21	19	15	46	37	34	18	39	28.5
LH	224	203	213.5	560	525	499	461	461	439		PBS
											PBS vs. PM1	-20.67	-47.47 to 6.14	No	ns	0.1261
											PBS vs. TSP	-10.17	-36.97 to 16.64	No	ns	0.5218
											LH
											PBS vs. PM1	-314.5	-341.3 to -287.7	Yes	****	0.0001
											PBS vs. TSP	-240.2	-267 to -213.4	Yes	****	0.0001
Junctions density (‰)
	PBS			PM1			TSP				Sidak's multiple comparisons test	Mean Diff.	95.00% CI of diff.	Significant?	Summary	Adjusted P Value
PBS	0.0212449	0.019151	0.015316	0.04544	0.037466	0.034105	0.038693	0.045276	0.051859
LH	0.218405	0.200239	0.209322	0.535518	0.502048	0.477185	0.441031	0.442215	0.421687		PBS
											PBS vs. PM1	-0.02043	-0.04607 to 0.005204	No	ns	0.1169
											PBS vs. TSP	-0.02671	-0.05234 to -0.001069	Yes	*	0.042
											LH
											PBS vs. PM1	-0.2956	-0.3212 to -0.27	Yes	****	<0.0001
											PBS vs. TSP	-0.2257	-0.2513 to -0.2	Yes	****	<0.0001

## Sheet: 3I
Mass/Charge, Da	LH	LH-PM1	LH-TSP
1005	9.51835	274.633	42.0734
1005	2.57587	196.334	14.3035
1005.01	3.849	191.195	19.396
1005.01	2.79027	137.817	15.1611
1005.02	1.8206	40.4042	11.2824
1005.02	4.99102	49.6043	23.9641
1005.03	12.5198	42.5934	54.0793
1005.03	5.31156	23.0798	25.2462
1005.03	0.63361	88.5558	6.53444
1005.04	0.98172	94.0152	7.92687
1005.04	1.22679	95.8189	8.90715
1005.05	1.27037	107.737	9.08147
1005.05	3.95849	83.2574	19.834
1005.06	6.8898	69.718	31.5592
1005.06	11.6231	77.6764	50.4926
1005.07	9.41697	109.858	41.6679
1005.07	5.32587	75.4698	25.3035
1005.08	8.65807	101.805	38.6323
1005.08	4.14646	119.31	20.5858
1005.08	7.33356	71.5044	33.3342
1005.09	6.99415	138.121	31.9766
1005.09	3.5291	199.624	18.1164
1005.1	1.20769	278.777	8.83076
1005.1	-0.60631	351.732	1.57476
1005.11	3.85703	405.608	19.4281
1005.11	1.69675	281.743	10.787
1005.12	-0.03424	147.991	3.86302
1005.12	0.33204	169.509	5.32816
1005.12	0.0792	127.6	4.31679
1005.13	0.3583	212.575	5.43319
1005.13	1.95372	127.069	11.8149
1005.14	0.13191	76.7866	4.52764
1005.14	0.12812	36.3805	4.5125
1005.15	1.09202	52.2002	8.36806
1005.15	-0.14737	44.892	3.41053
1005.16	0.11785	112.981	4.47138
1005.16	1.30558	34.9184	9.22232
1005.16	0.53677	79.6738	6.14708
1005.17	1.04952	80.3416	8.1981
1005.17	1.54643	27.9335	10.1857
1005.18	-0.16517	45.5679	3.3393
1005.18	6.84858	62.0373	31.3943
1005.19	2.43683	39.3622	13.7473
1005.19	3.05848	91.031	16.2339
1005.2	9.98026	45.7893	43.921
1005.2	11.4455	53.0253	49.7819
1005.21	6.92838	77.1086	31.7135
1005.21	11.2769	48.9928	49.1078
1005.21	5.3293	38.3184	25.3172
1005.22	8.85854	74.4467	39.4341
1005.22	13.9392	52.6489	59.7568
1005.23	10.1747	53.8528	44.699
1005.23	11.0913	74.8826	48.365
1005.24	4.50169	67.8438	22.0068
1005.24	3.71174	34.6558	18.8469
1005.25	13.3559	18.281	57.4238
1005.25	14.3742	40.5817	61.4966
1005.25	9.76745	26.6825	43.0698
1005.26	7.0989	36.9186	32.3956
1005.26	2.76297	16.0448	15.0519
1005.27	-0.75302	21.8491	0.98793
1005.27	4.19859	1.98821	20.7944
1005.28	13.4377	7.95735	57.751
1005.28	10.2365	14.0121	44.946
1005.29	3.7943	11.8698	19.1772
1005.29	7.99019	0.894	35.9608
1005.29	6.16596	7.97418	28.6638
1005.3	7.02398	3.15606	32.0959
1005.3	5.12273	16.2281	24.4909
1005.31	11.368	14.3396	49.4721
1005.31	9.39932	3.43227	41.5973
1005.32	13.2537	41.1533	57.0147
1005.32	14.1861	61.0305	60.7444
1005.33	11.1224	22.0882	48.4895
1005.33	7.47622	43.3845	33.9049
1005.34	14.2191	34.9256	60.8763
1005.34	10.6004	58.3263	46.4014
1005.34	11.1615	41.351	48.6461
1005.35	7.67424	41.4416	34.697
1005.35	14.878	39.2625	63.5121
1005.36	15.9968	66.7489	67.9872
1005.36	17.2479	49.6966	72.9918
1005.37	15.9194	202.099	67.6776
1005.37	8.97507	171.36	39.9003
1005.38	12.7671	149.653	55.0686
1005.38	22.3268	156.549	93.3072
1005.38	22.0027	180.752	92.0109
1005.39	26.8081	135.214	111.232
1005.39	40.9108	192.131	167.643
1005.4	34.338	248.745	141.352
1005.4	41.3951	220.33	169.58
1005.41	46.9652	187.095	191.861
1005.41	42.1358	161.192	172.543
1005.41	58.495	226.944	237.98
1005.42	46.4779	295.531	189.912
1005.42	41.3565	409.54	169.426
1005.43	35.0928	442.487	144.371
1005.43	44.689	373.59	182.756
1005.44	27.5195	363.866	114.078
1005.44	30.5589	471.887	126.236
1005.45	35.2863	358.749	145.145
1005.45	19.6295	275.077	82.5179
1005.46	13.5498	332.307	58.1992
1005.46	10.7842	245.076	47.1368
1005.47	3.60246	216.246	18.4098
1005.47	3.46481	313.916	17.8592
1005.47	8.64435	230.682	38.5774
1005.48	2.10979	459.649	12.4391
1005.48	1.17438	469.112	8.69751
1005.49	3.1487	372.053	16.5948
1005.49	8.99741	450.614	39.9896
1005.5	12.0769	390.691	52.3077
1005.5	3.52884	275.225	18.1153
1005.5	1.44074	256.861	9.76295
1005.51	6.13224	149.529	28.529
1005.51	2.5172	122.364	14.0688
1005.52	1.57888	114.072	10.3155
1005.52	7.73376	89.8075	34.935
1005.53	7.93544	74.162	35.7418
1005.53	4.7817	81.0139	23.1268
1005.54	3.21501	76.3277	16.8601
1005.54	16.5693	6.20987	70.2772
1005.54	23.3775	12.1687	97.5102
1005.55	14.2183	12.3711	60.873
1005.55	7.73304	45.0016	34.9322
1005.56	6.82023	45.5249	31.2809
1005.56	19.3432	60.9084	81.3727
1005.57	28.6761	41.4675	118.704
1005.57	18.741	70.7819	78.9642
1005.58	22.2496	31.5629	92.9986
1005.58	14.0812	2.31308	60.3248
1005.59	12.4121	33.2682	53.6483
1005.59	6.80642	33.7749	31.2257
1005.59	4.87997	11.2718	23.5199
1005.6	6.54469	8.72578	30.1788
1005.6	4.83436	25.5678	23.3374
1005.61	11.4571	18.5804	49.8285
1005.61	8.8028	37.1927	39.2112
1005.62	2.15597	34.2571	12.6239
1005.62	7.38905	13.2179	33.5562
1005.63	19.8885	13.0754	83.5541
1005.63	7.8247	33.0952	35.2988
1005.63	12.3608	66.7626	53.4431
1005.64	8.85966	59.9328	39.4386
1005.64	4.05164	94.0132	20.2066
1005.65	5.20602	104.033	24.8241
1005.65	11.3087	40.2797	49.2349
1005.66	7.18197	69.1558	32.7279
1005.66	3.67448	102.323	18.6979
1005.67	9.07552	135.522	40.3021
1005.67	16.5616	62.3671	70.2463
1005.67	7.33829	35.0769	33.3531
1005.68	4.3608	104.98	21.4432
1005.68	2.26643	81.9006	13.0657
1005.69	4.33125	48.1195	21.325
1005.69	3.67974	95.7468	18.719
1005.7	16.1467	36.9984	68.5869
1005.7	4.52314	37.1376	22.0926
1005.71	3.39751	75.5224	17.5901
1005.71	4.04531	35.8118	20.1812
1005.72	6.43386	31.2355	29.7355
1005.72	2.24727	73.3096	12.9891
1005.72	0.33303	85.0772	5.33213
1005.73	0.57121	74.9085	6.28482
1005.73	1.87993	63.6992	11.5197
1005.74	2.79581	56.0978	15.1832
1005.74	4.48338	29.5143	21.9335
1005.75	4.93584	73.1938	23.7434
1005.75	2.54299	129.678	14.172
1005.75	5.54426	226.991	26.177
1005.76	4.31159	122.718	21.2464
1005.76	5.03193	61.4282	24.1277
1005.77	6.75992	164.936	31.0397
1005.77	6.04964	208.329	28.1986
1005.78	5.58257	211.597	26.3303
1005.78	9.11805	160.325	40.4722
1005.79	10.1259	121.026	44.5037
1005.79	7.02863	106.192	32.1145
1005.8	10.1648	65.3128	44.6591
1005.8	2.97433	67.3298	15.8973
1005.8	6.23987	85.1847	28.9595
1005.81	10.8149	119.039	47.2595
1005.81	5.94908	85.6026	27.7963
1005.82	5.70314	58.9652	26.8126
1005.82	15.1627	118.335	64.6506
1005.83	13.581	57.6111	58.324
1005.83	6.77659	43.117	31.1063
1005.84	5.62181	88.6	26.4872
1005.84	10.5771	118.953	46.3084
1005.85	21.106	101.481	88.4242
1005.85	10.7969	82.986	47.1877
1005.85	14.7992	103.463	63.1968
1005.86	15.3829	102.364	65.5315
1005.86	23.9311	89.0024	99.7246
1005.87	17.2691	152.71	73.0763
1005.87	13.8553	82.9259	59.4214
1005.88	3.82934	76.1498	19.3174
1005.88	7.97896	72.7278	35.9158
1005.88	12.8802	89.0827	55.5207
1005.89	11.6777	110.946	50.7109
1005.89	4.96614	109.835	23.8646
1005.9	10.3572	105.452	45.4286
1005.9	7.77339	121.461	35.0936
1005.91	5.74827	131.653	26.9931
1005.91	12.0579	142.974	52.2316
1005.92	7.38766	114.445	33.5506
1005.92	5.19332	102.415	24.7733
1005.93	9.38833	141.692	41.5533
1005.93	13.6803	73.5953	58.7211
1005.93	17.6144	117.758	74.4575
1005.94	12.658	155.772	54.632
1005.94	14.3146	111.552	61.2582
1005.95	7.87225	161.982	35.489
1005.95	3.69578	87.708	18.7831
1005.96	10.775	125.874	47.1001
1005.96	8.09208	129.839	36.3683
1005.97	4.0297	77.656	20.1188
1005.97	3.75467	72.6138	19.0187
1005.98	2.53997	126.475	14.1599
1005.98	7.8149	104.346	35.2596
1005.98	8.17928	298.873	36.7171
1005.99	6.20813	250.907	28.8325
1005.99	10.0524	183.63	44.2097
1006	7.358	192.73	33.432
1006	10.7699	91.7993	47.0797
1006.01	12.1116	86.2501	52.4465
1006.01	11.0466	51.2905	48.1864
1006.01	4.12052	32.4944	20.4821
1006.02	3.34967	27.6515	17.3987
1006.02	4.51719	44.2827	22.0688
1006.03	8.42845	42.0591	37.7138
1006.03	10.1144	72.1992	44.4575
1006.04	11.6626	19.9056	50.6503
1006.04	10.4368	49.3891	45.7474
1006.05	7.33334	63.8444	33.3334
1006.05	12.2891	25.6714	53.1563
1006.05	14.4628	34.8107	61.8511
1006.06	11.4833	54.5769	49.9331
1006.06	5.83726	101.826	27.349
1006.07	4.45227	29.6224	21.8091
1006.07	17.4816	33.8143	73.9263
1006.08	15.3222	45.0555	65.2888
1006.08	8.11361	99.1004	36.4545
1006.09	11.5457	130.208	50.183
1006.09	12.9164	99.8908	55.6656
1006.1	7.47256	58.8556	33.8902
1006.1	7.77311	97.4623	35.0924
1006.11	5.64258	96.3072	26.5703
1006.11	17.6169	179.402	74.4675
1006.11	10.9459	156.389	47.7836
1006.12	4.43673	133.456	21.7469
1006.12	6.98174	119.297	31.927
1006.13	4.86783	66.506	23.4713
1006.13	8.88011	87.4101	39.5204
1006.14	13.0362	49.7623	56.1447
1006.14	2.84188	59.8422	15.3675
1006.14	1.46014	80.775	9.84057
1006.15	7.55905	60.5374	34.2362
1006.15	7.75855	126.344	35.0342
1006.16	6.82853	159.119	31.3141
1006.16	3.24751	111.906	16.99
1006.17	2.87931	108.099	15.5172
1006.17	0.9535	91.8433	7.81402
1006.18	1.96066	89.5827	11.8426
1006.18	3.2773	151.475	17.1092
1006.18	2.14913	55.446	12.5965
1006.19	1.77654	54.2719	11.1061
1006.19	2.46058	22.6722	13.8423
1006.2	0.96083	44.9948	7.84331
1006.2	2.59796	35.0935	14.3918
1006.21	2.94632	80.8552	15.7853
1006.21	3.73227	115.681	18.9291
1006.22	1.79242	87.0759	11.1697
1006.22	-0.36329	45.818	2.54686
1006.23	0.82819	45.7	7.31277
1006.23	2.80508	72.9757	15.2203
1006.23	2.22983	40.8156	12.9193
1006.24	-0.13076	62.9897	3.47696
1006.24	0.09584	40.0437	4.38335
1006.25	0.22385	55.5104	4.8954
1006.25	4.07711	64.9907	20.3084
1006.26	7.6177	58.1492	34.4708
1006.26	1.69261	76.2706	10.7705
1006.27	9.78748	21.5514	43.1499
1006.27	8.66476	1.80203	38.659
1006.27	3.31888		17.2755
1006.28	2.37737		13.5095
1006.28	0.56422		6.25687
1006.29	3.23147		16.9259
1006.29	18.9445		79.7781
1006.3	13.0716	24.305	56.2863
1006.3	13.2229	42.8168	56.8917
1006.31	10.8223	32.3439	47.2892
1006.31	10.6047	2.53427	46.4188
1006.32	18.6746	33.0745	78.6985
1006.32	12.7529	5.98786	55.0117
1006.32	10.3672	44.2032	45.4686
1006.33	10.6442	6.86335	46.5767
1006.33	10.6124	1.63023	46.4496
1006.34	6.54313	58.1985	30.1725
1006.34	11.108	38.2278	48.4318
1006.35	9.14022	52.1328	40.5609
1006.35	8.86862	52.9472	39.4745
1006.36	6.08115	67.7816	28.3246
1006.36	12.0014	161.29	52.0056
1006.36	10.4974	89.1229	45.9897
1006.37	10.2429	110.903	44.9718
1006.37	12.0714	105.443	52.2854
1006.38	22.6685	80.4669	94.674
1006.38	25.6166	138.401	106.466
1006.39	25.212	137.059	104.848
1006.39	16.2994	133.612	69.1976
1006.39	29.8168	237.698	123.267
1006.4	30.378	376.436	125.512
1006.4	33.1741	180.457	136.696
1006.41	24.3814	267.919	101.526
1006.41	36.8304	164.214	151.321
1006.42	40.4078	221.479	165.631
1006.42	44.0261	304.533	180.104
1006.43	44.6531	267.612	182.613
1006.43	47.0492	247.132	192.197
1006.44	35.5258	358.459	146.103
1006.44	35.8471	342.592	147.388
1006.45	40.3692	327.88	165.477
1006.45	38.6692	306.225	158.677
1006.45	57.7761	318.32	235.104
1006.46	40.4893	205.639	165.957
1006.46	19.3217	263.557	81.287
1006.47	17.1137	281.522	72.4549
1006.47	31.1466	233.584	128.586
1006.48	34.3169	270.571	141.268
1006.48	20.893	222.818	87.5721
1006.49	20.0692	147.122	84.2768
1006.49	13.1296	282.911	56.5184
1006.49	13.9385	156.849	59.754
1006.5	17.1692	206.628	72.6768
1006.5	15.8787	142.005	67.5147
1006.51	38.1224	127.525	156.49
1006.51	37.0079	116.311	152.032
1006.52	38.519	141.036	158.076
1006.52	32.6866	89.6548	134.746
1006.52	26.0945	48.1273	108.378
1006.53	17.7728	116.586	75.0911
1006.53	19.378	132.145	81.5119
1006.54	7.04156	100.254	32.1662
1006.54	9.19826	97.7314	40.7931
1006.55	9.58919	59.6335	42.3568
1006.55	3.95241	35.9847	19.8097
1006.56	9.63032	35.1651	42.5213
1006.56	10.771	72.5889	47.084
1006.57	13.718	40.3152	58.8721
1006.57	8.80274	14.9666	39.211
1006.58	11.2033	30.9697	48.8133
1006.58	8.091	99.797	36.364
1006.58	10.058	69.3563	44.232
1006.59	12.1263	44.3442	52.505
1006.59	5.0116	87.0944	24.0464
1006.6	5.0709	32.5083	24.2836
1006.6	3.28909	31.8194	17.1564
1006.61	3.07952	57.5137	16.3181
1006.61	4.13581	34.3	20.5433
1006.62	9.77734	59.7311	43.1094
1006.62	14.0448	67.4968	60.1792
1006.62	7.76861	40.1833	35.0744
1006.63	4.19601	46.1975	20.7841
1006.63	1.54456	20.1042	10.1782
1006.64	0.81142	21.7337	7.24566
1006.64	0.23227	43.6779	4.9291
1006.65	3.39456	28.8586	17.5782
1006.65	8.18412	10.7661	36.7365
1006.65	5.98401	0.76779	27.936
1006.66	9.03945	1.86363	40.1578
1006.66	3.2135	32.0676	16.854
1006.67	16.0032	14.6561	68.0129
1006.67	4.49682	19.8954	21.9873
1006.68	0.38628	35.4523	5.54514
1006.68	1.95577	41.1444	11.8231
1006.69	1.80008	32.8987	11.2003
1006.69	7.64331	34.37	34.5732
1006.7	9.51513	23.5826	42.0605
1006.7	3.00549	66.621	16.022
1006.7	3.73024	64.8761	18.921
1006.71	6.28554	71.4294	29.1422
1006.71	9.26314	58.5686	41.0525
1006.72	5.26312	87.8516	25.0525
1006.72	3.42649	103.145	17.706
1006.73	7.39547	59.0698	33.5819
1006.73	4.08527	96.6736	20.3411
1006.74	2.99589	77.3063	15.9836
1006.74	5.7692	57.1759	27.0768
1006.75	8.97053	79.0168	39.8821
1006.75	9.43218	78.6706	41.7287
1006.75	13.1687	56.0585	56.6749
1006.76	7.55346	97.2159	34.2139
1006.76	6.96586	126.549	31.8634
1006.77	4.64921	121.057	22.5968
1006.77	5.70165	87.2125	26.8066
1006.78	3.52914	104.412	18.1166
1006.78	12.8928	157.381	55.5714
1006.78	16.4346	130.717	69.7383
1006.79	8.29763	45.0951	37.1905
1006.79	9.38502	127.932	41.5401
1006.8	24.262	112.156	101.048
1006.8	8.41683	47.4551	37.6673
1006.81	16.0463	65.0793	68.1851
1006.81	19.7043	177.027	82.8171
1006.82	9.85071	51.8779	43.4028
1006.82	4.38745	107.103	21.5498
1006.83	11.3958	43.9985	49.5831
1006.83	7.60802	90.1384	34.4321
1006.83	9.05293	41.679	40.2117
1006.84	17.6947	9.39439	74.7788
1006.84	7.16889	36.1624	32.6756
1006.85	5.54036	65.318	26.1614
1006.85	6.69885	145.279	30.7954
1006.86	13.4951	124.868	57.9804
1006.86	22.4487	45.2677	93.7948
1006.87	18.1686	92.0384	76.6745
1006.87	19.618	152.21	82.4721
1006.88	11.3834	69.0248	49.5336
1006.88	11.3621	73.9086	49.4484
1006.88	10.9164	82.4196	47.6658
1006.89	5.77959	78.9215	27.1184
1006.89	12.387	170.919	53.5481
1006.9	18.1641	157.532	76.6564
1006.9	12.9139	223.564	55.6556
1006.91	10.8202	241.975	47.2807
1006.91	12.5425	181.782	54.17
1006.91	15.1695	145.165	64.6778
1006.92	11.1062	185.518	48.425
1006.92	8.59903	176.795	38.3961
1006.93	5.5733	121.963	26.2932
1006.93	7.09453	193.838	32.3781
1006.94	16.1249	93.4879	68.4997
1006.94	15.1115	137.777	64.4462
1006.95	21.4379	92.0278	89.7514
1006.95	18.468	34.9229	77.8721
1006.96	14.9593	54.347	63.8372
1006.96	25.2697	92.4534	105.079
1006.96	17.053	101.688	72.2122
1006.97	18.5328	143.206	78.131
1006.97	16.671	143.31	70.6839
1006.98	14.877	188.54	63.5082
1006.98	11.8964	110.912	51.5858
1006.99	8.95972	143.848	39.8389
1006.99	10.9523	104.551	47.8094
1007	8.1983	179.145	36.7932
1007	9.16433	91.3142	40.6573
1007	4.98736	121.621	23.9494
1007.01	2.90518	191.851	15.6207
1007.01	6.65406	73.4836	30.6162
1007.02	16.4798	115.62	69.919
1007.02	13.0846	133.589	56.3385
1007.03	11.0638	148.202	48.255
1007.03	14.0585	160.282	60.2338
1007.04	29.6119	34.5799	122.448
1007.04	14.562	104.44	62.248
1007.04	14.3928	116.135	61.5713
1007.05	17.2515	61.5726	73.0059
1007.05	20.838	55.1264	87.352
1007.06	22.7081	152.251	94.8324
1007.06	41.1737	210.456	168.695
1007.07	75.7521	349.33	307.008
1007.07	91.3137	463.498	369.255
1007.08	125.103	683.149	504.411
1007.08	106.537	542.161	430.15
1007.09	100.885	699.058	407.541
1007.09	71.3784	449.9	289.514
1007.09	44.787	307.552	183.148
1007.1	44.0755	221.806	180.302
1007.1	35.9066	205.512	147.626
1007.11	31.5624	156.153	130.249
1007.11	27.2957	137.479	113.183
1007.12	21.8091	149.71	91.2364
1007.12	24.167	172.115	100.668
1007.12	17.3662	149.588	73.4646
1007.13	11.1127	94.7525	48.451
1007.13	15.9897	131.77	67.9587
1007.14	6.9356	111.751	31.7424
1007.14	7.6611	91.9625	34.6444
1007.15	10.3703	102.746	45.4812
1007.15	15.2875	99.1639	65.1501
1007.16	9.98416	70.4074	43.9367
1007.16	3.70621	69.979	18.8249
1007.17	1.91632	39.6645	11.6653
1007.17	4.08374	127.298	20.335
1007.17	1.05312	74.4852	8.21247
1007.18	0.79979	150.51	7.19916
1007.18	2.53049	92.1998	14.122
1007.19	3.40242	131.362	17.6097
1007.19	5.28391	132.293	25.1357
1007.2	1.33416	122.569	9.33665
1007.2	4.16052	141.592	20.6421
1007.21	3.33239	81.9334	17.3296
1007.21	9.34168	152.25	41.3667
1007.22	7.20565	201.525	32.8226
1007.22	5.29639	134.678	25.1856
1007.22	4.93866	176.408	23.7546
1007.23	14.9054	178.122	63.6217
1007.23	12.1286	175.49	52.5142
1007.24	16.3015	76.0567	69.206
1007.24	26.187	102.974	108.748
1007.25	22.169	169.716	92.676
1007.25	33.9113	100.264	139.645
1007.25	46.2037	199.066	188.815
1007.26	73.3063	295.029	297.225
1007.26	159.122	508.51	640.489
1007.27	266.72	966.242	1070.88
1007.27	269.311	1200.23	1081.24
1007.28	317.217	1358.01	1272.87
1007.28	293.265	1211.39	1177.06
1007.29	205.487	1109	825.947
1007.29	165.483	1044.61	665.93
1007.29	115.169	762.409	464.678
1007.3	88.9948	603.557	359.979
1007.3	78.6027	448.629	318.411
1007.31	69.6236	226.72	282.494
1007.31	42.8915	144.345	175.566
1007.32	42.3246	100.103	173.298
1007.32	38.3076	140.636	157.23
1007.33	28.748	102.826	118.992
1007.33	16.0027	64.132	68.0109
1007.34	7.39421	94.3171	33.5769
1007.34	22.0578	81.5003	92.2312
1007.35	17.7147	44.4471	74.859
1007.35	32.38	88.7173	133.52
1007.35	35.2365	130.312	144.946
1007.36	21.8468	88.4898	91.3872
1007.36	20.3149	174.568	85.2597
1007.37	23.5151	102.709	98.0606
1007.37	36.6804	86.2994	150.722
1007.38	35.4432	95.5254	145.773
1007.38	34.1426	84.2685	140.57
1007.38	30.3282	242.331	125.313
1007.39	37.7689	341.366	155.076
1007.39	29.6615	183.152	122.646
1007.4	44.5425	330.74	182.17
1007.4	53.2534	388.498	217.014
1007.41	69.9288	289.108	283.715
1007.41	58.5718	392.572	238.287
1007.42	64.0803	391.415	260.321
1007.42	59.478	272.018	241.912
1007.42	51.4092	342.194	209.637
1007.43	50.657	385.067	206.628
1007.43	57.6609	453.877	234.644
1007.44	53.2158	549.183	216.863
1007.44	65.1574	443.897	264.63
1007.45	75.0879	519.573	304.352
1007.45	100.173	628.117	404.694
1007.46	116.143	801.595	468.571
1007.46	179.089	729.392	720.357
1007.47	224.114	1044.2	900.457
1007.47	362.715	1607.4	1454.86
1007.48	406.645	2345.5	1630.58
1007.48	401.376	2191.64	1609.51
1007.48	345.532	2038.13	1386.13
1007.49	332.45	1780.11	1333.8
1007.49	234.485	1354.87	941.939
1007.5	180.847	1027.65	727.39
1007.5	122.726	705.327	494.906
1007.51	117.368	329.371	473.472
1007.51	90.2615	303.905	365.046
1007.51	77.5712	267.065	314.285
1007.52	59.0811	191.418	240.324
1007.52	48.1063	195.963	196.425
1007.53	28.1151	180.011	116.46
1007.53	13.527	99.3482	58.1081
1007.54	27.5231	46.3461	114.092
1007.54	23.8444	25.9985	99.3776
1007.55	23.5139	44.6469	98.0555
1007.55	14.9568	48.2795	63.827
1007.55	7.39502	44.5643	33.5801
1007.56	4.83129	62.0625	23.3252
1007.56	17.2831	50.8357	73.1326
1007.57	23.4012	76.3218	97.6049
1007.57	13.6072	37.8957	58.4288
1007.58	16.004	72.2693	68.0162
1007.58	13.2489	50.1426	56.9956
1007.59	6.81999	46.2141	31.2799
1007.59	17.5159	18.6108	74.0636
1007.6	19.4394	112.828	81.7576
1007.6	36.0205	135.85	148.082
1007.61	33.1328	125.026	136.531
1007.61	26.5387	132.391	110.155
1007.61	28.4132	259.242	117.653
1007.62	29.4353	176.634	121.741
1007.62	50.4666	162.107	205.866
1007.63	39.4352	185.339	161.741
1007.63	52.9604	268.667	215.842
1007.64	41.2266	143.363	168.907
1007.64	32.3591	191.934	133.436
1007.64	36.8941	227.472	151.576
1007.65	38.4645	179.321	157.858
1007.65	45.5195	267.239	186.078
1007.66	80.2409	357.074	324.963
1007.66	120.418	499.016	485.673
1007.67	228.685	990.085	918.739
1007.67	302.457	1278.25	1213.83
1007.68	336.561	1765.81	1350.25
1007.68	368.389	1952.51	1477.56
1007.68	330.717	1723.37	1326.87
1007.69	220.586	1367.56	886.343
1007.69	212.232	1055.13	852.929
1007.7	161.227	787.521	648.908
1007.7	103.906	492.957	419.624
1007.71	83.1505	389.779	336.602
1007.71	79.2433	310.166	320.973
1007.72	69.2723	215.833	281.089
1007.72	61.8256	229.761	251.302
1007.73	37.7707	173.73	155.083
1007.73	17.0651	89.6179	72.2603
1007.73	39.494	105.799	161.976
1007.74	33.2909	112.936	137.164
1007.74	16.358	142.895	69.4319
1007.75	13.9703	108.993	59.8814
1007.75	16.1241	121.425	68.4964
1007.76	26.5592	58.7712	110.237
1007.76	22.8928	86.4078	95.5712
1007.77	13.0792	120.745	56.3168
1007.77	15.7695	109.125	67.0778
1007.77	17.2306	148.718	72.9223
1007.78	11.952	124.772	51.8078
1007.78	14.2631	79.4577	61.0523
1007.79	22.1894	129.791	92.7575
1007.79	24.2765	155.274	101.106
1007.8	27.7558	202.577	115.023
1007.8	29.4816	166.516	121.926
1007.81	25.8935	179.426	107.574
1007.81	31.2495	142.517	128.998
1007.82	14.5743	232.254	62.297
1007.82	28.3846	204.793	117.539
1007.82	30.7445	111.285	126.978
1007.83	39.9294	83.3418	163.718
1007.83	48.1298	188.872	196.519
1007.84	29.6234	192.738	122.494
1007.84	25.5934	181.326	106.373
1007.85	23.7317	189.559	98.9268
1007.85	24.8853	208.034	103.541
1007.86	37.7985	181.518	155.194
1007.86	68.496	229.038	277.984
1007.86	112.941	393.316	455.764
1007.87	162.799	581.995	655.196
1007.87	229.525	900.75	922.101
1007.88	264.802	1179.72	1063.21
1007.88	255.385	1337.88	1025.54
1007.89	226.062	1265.15	908.248
1007.89	188.377	1009.88	757.507
1007.9	133.619	820.775	538.478
1007.9	79.2541	590.915	321.016
1007.9	77.4955	433.782	313.982
1007.91	66.2597	293.595	269.039
1007.91	49.9907	304.341	203.963
1007.92	49.8755	235.534	203.502
1007.92	45.4449	188.641	185.78
1007.93	21.9179	202.578	91.6714
1007.93	26.0634	179.09	108.253
1007.94	12.5218	177.088	54.0871
1007.94	35.5959	105.099	146.383
1007.95	35.7813	133.929	147.125
1007.95	38.7623	157.361	159.049
1007.95	34.1833	182.526	140.733
1007.96	27.6125	228.382	114.45
1007.96	25.6352	119.957	106.541
1007.97	15.593	201.034	66.372
1007.97	14.627	188.477	62.5078
1007.98	19.4298	178.023	81.7192
1007.98	15.6195	144.146	66.478
1007.99	23.4421	105.059	97.7685
1007.99	6.80737	75.1219	31.2295
1007.99	10.6932	216.036	46.7729
1008	15.4039	109.292	65.6154
1008	23.2371	89.7873	96.9486
1008.01	20.3264	67.9039	85.3057
1008.01	16.2025	107.828	68.8102
1008.02	16.7567	84.8925	71.0266
1008.02	13.7115	79.4889	58.846
1008.03	10.4065	214.084	45.6261
1008.03	10.8426	110.328	47.3703
1008.03	15.9728	66.9473	67.8913
1008.04	29.8093	201.435	123.237
1008.04	39.4362	155.215	161.745
1008.05	17.9557	99.3162	75.8227
1008.05	19.6901	202.513	82.7605
1008.06	50.1261	187.938	204.505
1008.06	58.6177	229.104	238.471
1008.07	95.0819	330.099	384.328
1008.07	127.377	537.978	513.51
1008.08	157.523	672.607	634.091
1008.08	162.153	870.142	652.612
1008.08	147.843	843.277	595.372
1008.09	161.535	753.379	650.139
1008.09	118.662	531.597	478.646
1008.1	76.147	466.669	308.588
1008.1	70.9249	360.391	287.7
1008.11	44.1118	296.138	180.447
1008.11	41.828	248.891	171.312
1008.12	26.978	250.867	111.912
1008.12	22.5229	113.472	94.0917
1008.12	28.9407	176.712	119.763
1008.13	11.222	152.502	48.8881
1008.13	8.49947	92.9435	37.9979
1008.14	7.62811	65.8096	34.5124
1008.14	3.35732	47.8981	17.4293
1008.15	14.6176	60.9708	62.4705
1008.15	5.64918	119.072	26.5967
1008.16	0.26528	69.9659	5.06112
1008.16	9.06307	34.2921	40.2523
1008.16	9.16487	76.3008	40.6595
1008.17	5.66701	41.4076	26.668
1008.17	3.40979	2.15869	17.6392
1008.18	6.54568	1.34324	30.1827
1008.18	0.97124	13.5055	7.88498
1008.19	8.59562	30.8728	38.3825
1008.19	8.4249	40.3466	37.6996
1008.2	4.51482	52.4272	22.0593
1008.2	8.24633	57.5594	36.9853
1008.21	15.1016	74.9418	64.4065
1008.21	10.8997	42.6746	47.5987
1008.21	21.2761	71.6516	89.1045
1008.22	7.81008	42.2065	35.2403
1008.22	11.8149	43.7431	51.2596
1008.23	9.97767	51.8598	43.9107
1008.23	7.48752	96.6987	33.9501
1008.24	14.8205	66.9311	63.282
1008.24	23.3844	53.9039	97.5377
1008.25	16.1038	17.1884	68.4152
1008.25	14.9167	35.6972	63.6666
1008.25	18.1084	41.9286	76.4336
1008.26	33.4688	124.062	137.875
1008.26	42.9233	123.577	175.693
1008.27	52.7863	221.695	215.145
1008.27	78.6677	279.317	318.671
1008.28	90.1778	489.2	364.711
1008.28	95.6658	523.603	386.663
1008.28	91.5148	329.63	370.059
1008.29	92.0704	335.554	372.282
1008.29	89.9584	221.362	363.834
1008.3	43.0849	137.417	176.34
1008.3	32.0228	143.497	132.091
1008.31	29.107	137.704	120.428
1008.31	10.6661	74.7211	46.6645
1008.32	11.2987	47.4781	49.1947
1008.32	14.8765	50.8546	63.5061
1008.33	12.1586	65.2899	52.6345
1008.33	16.1978	59.5397	68.7912
1008.34	9.29911	20.4741	41.1964
1008.34	11.9814	81.1626	51.9257
1008.34	8.11201	64.1447	36.448
1008.35	14.6007	53.5611	62.4029
1008.35	11.76	74.6758	51.0399
1008.36	11.2004	48.7789	48.8015
1008.36	19.3379	25.8559	81.3514
1008.37	15.4006	24.56	65.6023
1008.37	10.5989	70.0712	46.3957
1008.38	16.4837	89.7276	69.9346
1008.38	20.6124	46.9602	86.4498
1008.38	21.6545	69.4281	90.6181
1008.39	13.5947	128.215	58.3789
1008.39	27.0979	143.374	112.392
1008.4	42.96	266.619	175.84
1008.4	29.9148	210.023	123.659
1008.41	27.9677	282.924	115.871
1008.41	30.3676	338.306	125.47
1008.41	29.879	285.287	123.516
1008.42	57.2032	230.617	232.813
1008.42	50.3093	256.344	205.237
1008.43	45.3606	303.795	185.443
1008.43	56.3049	289.787	229.22
1008.44	49.1717	374.916	200.687
1008.44	46.9265	385.326	191.706
1008.45	58.8109	314.249	239.244
1008.45	53.142	350.018	216.568
1008.46	63.199	389.791	256.796
1008.46	54.765	521.038	223.06
1008.47	49.11	405.266	200.44
1008.47	68.1453	479.861	276.581
1008.47	96.2684	388.178	389.073
1008.48	100.151	500.839	404.606
1008.48	93.0821	405.871	376.328
1008.49	80.1308	290.104	324.523
1008.49	55.0359	353.432	224.144
1008.5	40.5004	216.717	166.002
1008.5	38.5972	134.526	158.389
1008.5	23.0204	128.204	96.0816
1008.51	16.9415	55.1199	71.766
1008.51	13.5861	18.7852	58.3444
1008.52	11.3302	29.0719	49.3207
1008.52	9.48946	79.2336	41.9578
1008.53	4.95374	48.8955	23.8149
1008.53	0.99621	14.2363	7.98484
1008.54	3.1117	70.7316	16.4468
1008.54	7.21171	9.72712	32.8468
1008.54	9.52901	77.5182	42.116
1008.55	9.99219	12.7377	43.9688
1008.55	2.74798	33.424	14.9919
1008.56	1.17234	55.4326	8.68936
1008.56	1.77741	24.5639	11.1097
1008.57	2.01784	2.46084	12.0714
1008.57	7.49501	11.1048	33.98
1008.58	5.65221	34.5256	26.6089
1008.58	6.65445	12.6384	30.6178
1008.59	6.95024	1.47263	31.801
1008.59	13.7591	10.894	59.0364
1008.6	14.0838	1.43936	60.3353
1008.6	10.3167	10.894	45.2669
1008.61	9.53774		42.151
1008.61	6.04184	5.67963	28.1674
1008.61	9.06381	77.01	40.2552
1008.62	10.827	35.2329	47.3081
1008.62	8.75736	6.07343	39.0294
1008.63	12.3476	43.282	53.3904
1008.63	9.12671	22.5946	40.5069
1008.63	12.2351	1.76091	52.9402
1008.64	11.0821	23.1951	48.3285
1008.64	8.19602	12.6382	36.7841
1008.65	5.52235	1.47266	26.0894
1008.65	4.95773	33.9599	23.8309
1008.66	11.1846	11.1904	48.7383
1008.66	16.1586	34.5169	68.6343
1008.67	16.6852	39.3657	70.7407
1008.67	19.6515	65.8166	82.6059
1008.67	26.7141	60.0461	110.857
1008.68	26.0186	94.5374	108.074
1008.68	21.9546	106.389	91.8186
1008.69	41.9314	92.5188	171.725
1008.69	29.074	83.0231	120.296
1008.7	11.0396	38.5577	48.1585
1008.7	18.2431	85.9294	76.9725
1008.71	13.6687	92.0883	58.6747
1008.71	16.1433	51.4521	68.5733
1008.72	7.10802	60.7915	32.4321
1008.72	10.0687	108.819	44.2749
1008.73	16.839	80.1746	71.356
1008.73	13.7878	71.0318	59.1512
1008.73	16.153	47.4956	68.6118
1008.74	1.70602	43.2722	10.8241
1008.74	3.2159	85.4484	16.8636
1008.75	14.5838	79.453	62.3354
1008.75	23.8769	80.4443	99.5075
1008.76	3.97018	57.3	19.8807
1008.76	3.93161	34.9866	19.7264
1008.76	8.83942	15.9671	39.3577
1008.77	1.23818	90.4266	8.9527
1008.77	7.90516	88.6458	35.6206
1008.78	12.6241	83.8222	54.4965
1008.78	3.64875	35.9926	18.595
1008.79	2.08421	68.0598	12.3369
1008.79	1.52981	120.206	10.1192
1008.8	6.55438	96.0071	30.2175
1008.8	11.2379	45.111	48.9517
1008.8	12.1943	87.0824	52.777
1008.81	3.7397	30.5122	18.9588
1008.81	5.84929	39.3267	27.3971
1008.82	2.8229	77.0827	15.2916
1008.82	8.37341	74.5844	37.4936
1008.83	7.90862	43.9214	35.6345
1008.83	5.2991	53.6353	25.1964
1008.84	-0.32376	33.4912	2.70496
1008.84	6.46691	65.5601	29.8676
1008.85	4.3278	16.6795	21.3112
1008.85	10.1656	58.4258	44.6622
1008.86	8.50785	60.6221	38.0314
1008.86	6.79587	81.474	31.1835
1008.86	7.47264	152.481	33.8906
1008.87	11.7076	168.803	50.8303
1008.87	12.996	194.108	55.9838
1008.88	12.6404	66.0865	54.5616
1008.88	6.93628	70.6353	31.7451
1008.89	7.3933	89.8914	33.5732
1008.89	11.4106	87.1467	49.6422
1008.89	11.6858	81.2759	50.7431
1008.9	8.54699	170.369	38.188
1008.9	5.99878	61.9271	27.9951
1008.91	6.40471	105.764	29.6188
1008.91	7.95193	170.111	35.8077
1008.92	11.0399	221.613	48.1596
1008.92	12.575	238.265	54.2998
1008.93	11.5355	114.303	50.142
1008.93	11.7101	82.0385	50.8403
1008.93	15.48	141.829	65.9198
1008.94	19.9839	84.2724	83.9355
1008.94	15.4338	194.345	65.7354
1008.95	11.2533	129.533	49.0132
1008.95	6.75493	93.887	31.0197
1008.96	9.40786	85.3733	41.6314
1008.96	20.101	124.213	84.4042
1008.97	12.7842	86.7895	55.1367
1008.97	10.3591	99.0511	45.4363
1008.98	8.14374	48.8979	36.575
1008.98	8.93239	47.8301	39.7296
1008.99	4.18672	31.5584	20.7469
1008.99	3.18507	45.5537	16.7403
1008.99	7.98835	12.5916	35.9534
1009	2.68794	50.6016	14.7517
1009	1.23461	107.089	8.93844
1009.01	0.98552	58.3494	7.94209
1009.01	2.40785	72.7989	13.6314
1009.02	6.03495	33.3223	28.1398
1009.02	7.55295	33.9498	34.2118
1009.02	5.72827	13.451	26.9131
1009.03	2.92403	46.3356	15.6961
1009.03	8.19046	64.3654	36.7618
1009.04	0.31959	53.8599	5.27837
1009.04	4.8199	88.8942	23.2796
1009.05	7.20948	42.0726	32.8379
1009.05	13.8194	23.575	59.2778
1009.06	16.109	73.9113	68.436
1009.06	12.3193	91.7262	53.2771
1009.07	9.85664	29.9641	43.4265
1009.07	8.91517	132.638	39.6607
1009.07	7.92827	82.3839	35.7131
1009.08	10.6413	135.778	46.5653
1009.08	9.43658	76.8765	41.7463
1009.09	9.21759	47.1184	40.8704
1009.09	14.2067	77.6103	60.8268
1009.1	3.12916	106.251	16.5166
1009.1	4.74437	174.075	22.9775
1009.11	6.30762	90.0401	29.2305
1009.11	1.76267	81.2334	11.0507
1009.12	2.55749	49.2403	14.23
1009.12	18.9634	53.1238	79.8537
1009.12	19.0663	80.4539	80.2654
1009.13	7.63696	44.538	34.5478
1009.13	0.9234	51.0652	7.6936
1009.14	4.15763	51.3506	20.6305
1009.14	6.59932	93.7397	30.3973
1009.15	5.5142	49.6986	26.0568
1009.15	7.16583	10.5694	32.6633
1009.15	2.37937	46.583	13.5175
1009.16	2.54828	32.3419	14.1931
1009.16	1.81099	17.916	11.244
1009.17	5.30802	40.6012	25.2321
1009.17	3.16984	53.5047	16.6793
1009.18	4.37281	39.7735	21.4912
1009.18	6.61965	27.2844	30.4786
1009.19	4.29065	43.1078	21.1626
1009.19	9.38074	22.5524	41.5229
1009.2	9.35248	30.9258	41.4099
1009.2	5.71063	70.2736	26.8425
1009.2	10.0606	45.1327	44.2425
1009.21	5.14855	35.4991	24.5942
1009.21	5.05356	27.3685	24.2142
1009.22	8.6583	46.9353	38.6332
1009.22	9.78381	39.5472	43.1352
1009.23	5.2001	56.0667	24.8004
1009.23	7.15683	59.6261	32.6273
1009.24	1.49076	43.1493	9.96303
1009.24	13.4107	5.53177	57.6428
1009.25	13.4514	34.2605	57.8058
1009.25	12.1038	36.0656	52.4151
1009.25	2.51061	33.7196	14.0424
1009.26	8.06428	23.672	36.2571
1009.26	14.0814	16.4701	60.3256
1009.27	7.50675	42.0376	34.027
1009.27	7.24894	18.8703	32.9958
1009.28	12.6651	29.5018	54.6602
1009.28	8.67775	33.6602	38.711
1009.28	7.46212	23.806	33.8485
1009.29	21.2164	36.0298	88.8658
1009.29	5.36009	12.8328	25.4404
1009.3	6.64612	21.6525	30.5845
1009.3	7.76408	29.5963	35.0563
1009.31	12.7863	53.7149	55.1452
1009.31	8.42997	28.0029	37.7199
1009.32	8.22015	29.8423	36.8806
1009.32	3.9072	2.51409	19.6288
1009.33	4.94688	10.8623	23.7875
1009.33	11.7004	11.7334	50.8015
1009.34	14.2458	0.88768	60.9834
1009.34	9.2739	44.1232	41.0956
1009.35	11.1769	20.2175	48.7077
1009.35	14.4897	14.8193	61.9586
1009.36	6.80323	65.2481	31.2129
1009.36	10.5591	133.854	46.2364
1009.37	17.2717	99.2881	73.0869
1009.37	21.3608	87.9931	89.4431
1009.38	17.9021	18.4904	75.6083
1009.38	19.8973	56.4964	83.589
1009.38	26.0247	124.112	108.099
1009.39	28.8757	192.218	119.503
1009.39	20.4574	290.273	85.8297
1009.4	22.9448	126.435	95.7793
1009.4	37.0345	114.994	152.138
1009.41	25.6458	253.379	106.583
1009.41	20.5226	317.306	86.0906
1009.41	36.3943	255.062	149.577
1009.42	31.9182	275.479	131.673
1009.42	52.9131	270.372	215.652
1009.43	33.4301	265.846	137.72
1009.43	31.002	220.317	128.008
1009.44	41.3133	265.372	169.253
1009.44	35.8053	280.88	147.221
1009.45	50.4775	239.187	205.91
1009.45	52.7462	346.842	214.985
1009.46	36.3388	223.417	149.355
1009.46	39.5745	239.048	162.298
1009.46	56.3282	405.622	229.313
1009.47	38.2827	257.172	157.131
1009.47	21.6506	215.872	90.6024
1009.48	24.5033	227.037	102.013
1009.48	13.3263	83.9108	57.3053
1009.49	15.6021	119.265	66.4084
1009.49	17.2275	144.613	72.91
1009.5	5.60048	135.216	26.4019
1009.5	4.5627	123.612	22.2508
1009.5	8.73144	133.118	38.9258
1009.51	5.25145	96.8918	25.0058
1009.51	6.80972	31.9259	31.2389
1009.52	1.39756	50.3309	9.59024
1009.52	1.13041	19.9682	8.52166
1009.53	5.69306	33.4418	26.7722
1009.53	1.69203	60.5849	10.7681
1009.54	4.54605	44.325	22.1842
1009.54	10.3546	15.6442	45.4183
1009.54	3.60165	48.4433	18.4066
1009.55	6.02211	37.6011	28.0884
1009.55	1.3803	30.2451	9.52119
1009.56	-0.91902	41.3951	0.32392
1009.56	-0.37798	4.67158	2.48808
1009.57	0.64463	20.4565	6.57851
1009.57	5.56439	22.5817	26.2575
1009.57	4.47044		21.8818
1009.58	2.41061	24.3571	13.6424
1009.58	0.56859	44.5502	6.27434
1009.59	3.59405	13.8345	18.3762
1009.59	5.12977	24.4178	24.5191
1009.59	2.37757	41.1291	13.5103
1009.6	6.15659	17.7106	28.6264
1009.6	6.06888	47.1577	28.2755
1009.61	11.5914	42.9079	50.3655
1009.61	7.34423	35.8086	33.3769
1009.62	1.88773	32.7244	11.5509
1009.62	5.23852	25.2825	24.9541
1009.63	4.68942	16.6886	22.7577
1009.63	1.91608	30.9113	11.6643
1009.63	1.27881	34.0716	9.11525
1009.64	9.95109	54.5759	43.8044
1009.64	12.5477	79.0359	54.1908
1009.65	6.94865	39.6485	31.7946
1009.65	2.88209	97.8785	15.5284
1009.66	10.9214	51.0294	47.6854
1009.66	7.62393	66.529	34.4957
1009.67	16.2788	50.3741	69.1151
1009.67	15.8284	47.3479	67.3136
1009.67	10.7577	64.8166	47.0309
1009.68	13.7297	11.5164	58.9188
1009.68	22.227	24.6647	92.9081
1009.69	22.1053	42.5628	92.4212
1009.69	17.6121	36.1392	74.4485
1009.7	18.1069	19.2366	76.4277
1009.7	12.2791	6.4304	53.1165
1009.71	11.428	46.3459	49.7121
1009.71	8.0078	64.8158	36.0312
1009.72	3.70302	55.2725	18.8121
1009.72	14.3561	31.6384	61.4243
1009.72	11.8174	3.43351	51.2695
1009.73	11.2493	22.9324	48.9974
1009.73	18.6163	16.9432	78.465
1009.74	26.9794	76.8012	111.918
1009.74	13.1095	29.6773	56.4381
1009.75	5.82731	15.2715	27.3092
1009.75	1.95975	57.0103	11.839
1009.76	8.69479	62.315	38.7792
1009.76	6.76757	81.8577	31.0703
1009.76	12.3345	89.8277	53.3381
1009.77	13.7499	89.3987	58.9995
1009.77	11.8021	67.1269	51.2085
1009.78	9.85581	50.2774	43.4233
1009.78	8.27448	68.7233	37.0979
1009.79	3.90963	34.0735	19.6385
1009.79	7.75882	71.9929	35.0353
1009.8	10.1576	67.2995	44.6304
1009.8	4.18868	32.1902	20.7547
1009.8	5.63359	15.8694	26.5344
1009.81	3.58387	52.7591	18.3355
1009.81	9.919	36.5106	43.676
1009.82	10.7213	75.5157	46.8853
1009.82	4.6859	77.0305	22.7436
1009.83	6.54142	95.9346	30.1657
1009.83	10.0052	38.1198	44.0207
1009.84	8.98408	12.4304	39.9363
1009.84	11.1274	61.5295	48.5098
1009.85	8.43167	103.949	37.7267
1009.85	6.76332	34.8981	31.0533
1009.85	11.3604	30.7307	49.4415
1009.86	19.8181	66.473	83.2724
1009.86	6.25206	51.3087	29.0082
1009.87	19.1358	56.6311	80.5432
1009.87	15.1271	132.412	64.5084
1009.88	9.85153	94.1157	43.4061
1009.88	7.70431	55.4732	34.8173
1009.89	13.9955	86.6776	59.9819
1009.89	20.4215	46.9324	85.686
1009.89	15.9506	51.7059	67.8023
1009.9	14.3712	91.6879	61.4848
1009.9	16.6047	58.0991	70.4187
1009.91	14.3613	186.589	61.4454
1009.91	20.9749	106.244	87.8998
1009.92	18.0703	139.949	76.281
1009.92	25.4209	102.418	105.684
1009.93	20.5557	143.364	86.2228
1009.93	17.3618	113.876	73.4471
1009.93	9.80591	139.629	43.2236
1009.94	16.3223	172.614	69.2893
1009.94	12.6157	106.647	54.4629
1009.95	24.5779	220.297	102.311
1009.95	27.5707	87.0393	114.283
1009.96	31.4776	120.162	129.91
1009.96	16.2293	63.751	68.9173
1009.97	17.5092	98.3728	74.0367
1009.97	21.7746	217.05	91.0984
1009.98	12.9246	213.198	55.6986
1009.98	19.2419	128.38	80.9678
1009.98	10.9207	94.7864	47.6828
1009.99	12.3796	111.671	53.5185
1009.99	13.286	67.3719	57.1441
1010	8.96459	55.1311	39.8584
1010	9.65734	83.7768	42.6294
1010.01	11.9359	91.5185	51.7436
1010.01	13.5547	78.0589	58.2189
1010.02	7.34235	105.896	33.3694
1010.02	3.90123	92.4237	19.6049
1010.02	4.56483	100.761	22.2593
1010.03	2.11103	124.667	12.4441
1010.03	6.74086	151.994	30.9635
1010.04	4.50883	80.0586	22.0353
1010.04	15.7601	82.9866	67.0403
1010.05	4.49055	42.6306	21.9622
1010.05	1.99056	52.0832	11.9622
1010.06	6.25944	126.238	29.0377
1010.06	4.49971	109.673	21.9989
1010.07	14.2683	248.451	61.0732
1010.07	19.1161	188.381	80.4646
1010.07	9.04892	286.428	40.1957
1010.08	1.87473	178.853	11.4989
1010.08	6.25027	146.953	29.0011
1010.09	1.69194	155.234	10.7677
1010.09	9.13415	173.18	40.5366
1010.1	13.6833	233.295	58.7332
1010.1	5.19771	221.004	24.7908
1010.11	10.0481	174.283	44.1924
1010.11	6.92234	237.109	31.6894
1010.11	9.14855	212.657	40.5942
1010.12	7.56382	125.556	34.2553
1010.12	6.35036	153.074	29.4014
1010.13	8.84073	154.944	39.3629
1010.13	9.87456	117.665	43.4982
1010.14	12.0487	132.898	52.1947
1010.14	8.68325	101.504	38.733
1010.15	1.69197	161.329	10.7679
1010.15	11.0765	134.276	48.3061
1010.15	4.67348	201.843	22.6939
1010.16	3.93303	146.579	19.7321
1010.16	2.33212	136.029	13.3285
1010.17	6.17909	120.439	28.7163
1010.17	3.89707	153.53	19.5883
1010.18	8.1954	184.863	36.7816
1010.18	10.7786	83.9231	47.1143
1010.19	5.28842	70.6975	25.1537
1010.19	3.19901	82.0832	16.7961
1010.2	7.11217	106.721	32.4487
1010.2	11.0332	180.58	48.1329
1010.2	12.9882	115.762	55.9527
1010.21	17.7545	96.4124	75.0179
1010.21	19.3011	135.745	81.2043
1010.22	17.9465	105.691	75.7858
1010.22	22.8993	81.9951	95.5971
1010.23	25.2825	105.695	105.13
1010.23	11.0624	170.162	48.2494
1010.24	20.7916	126.297	87.1662
1010.24	19.8079	134.086	83.2315
1010.25	33.7533	182.762	139.013
1010.25	49.7505	166.652	203.002
1010.25	67.4648	285.006	273.859
1010.26	126.378	602.763	509.511
1010.26	215.5	1217.48	865.998
1010.27	416.903	1903.18	1671.61
1010.27	590.609	2446.6	2366.44
1010.28	625.231	3333.33	2504.93
1010.28	527.59	3073.99	2114.36
1010.28	419.336	2681.28	1681.34
1010.29	341.445	2053.56	1369.78
1010.29	274.921	1402.26	1103.68
1010.3	179.322	1165.51	721.288
1010.3	141.224	571.496	568.894
1010.31	86.046	636.66	348.184
1010.31	78.2657	400.24	317.063
1010.32	43.5814	223.073	178.325
1010.32	22.9032	232.539	95.613
1010.33	33.6332	184.621	138.533
1010.33	34.2037	104.473	140.815
1010.33	21.7104	171.746	90.8417
1010.34	23.2438	125.464	96.9753
1010.34	22.9676	152.036	95.8704
1010.35	25.0243	136.438	104.097
1010.35	16.6976	59.219	70.7902
1010.36	12.6413	120.826	54.5652
1010.36	22.3339	83.3073	93.3355
1010.37	31.1347	193.173	128.539
1010.37	29.1156	234.059	120.462
1010.38	41.7928	200.7	171.171
1010.38	39.8515	318.008	163.406
1010.38	20.6437	370.096	86.5747
1010.39	34.0085	405.802	140.034
1010.39	38.6018	302.92	158.407
1010.4	64.9475	321.804	263.79
1010.4	46.6133	277.367	190.453
1010.41	47.4972	350.754	193.989
1010.41	59.2588	432.373	241.035
1010.41	43.6817	350.595	178.727
1010.42	58.7267	536.673	238.907
1010.42	70.0266	495.48	284.107
1010.43	43.028	432.324	176.112
1010.43	53.852	562.182	219.408
1010.44	74.1167	560.396	300.467
1010.44	68.0277	469.871	276.111
1010.45	81.3312	639.058	329.325
1010.45	115.253	770.2	465.01
1010.46	218.282	992.117	877.127
1010.46	383.686	1913	1538.74
1010.46	749.289	3601.4	3001.15
1010.47	1140.44	5372.41	4565.75
1010.47	1482.89	8075.49	5935.54
1010.48	1571.89	9731.93	6291.58
1010.48	1492.51	7966.03	5974.03
1010.49	1120.27	6884.62	4485.07
1010.49	807.634	5269.01	3234.53
1010.5	615.285	3529.07	2465.14
1010.5	442.17	2459.64	1772.68
1010.5	335.824	1858.59	1347.3
1010.51	222.776	1328.11	895.105
1010.51	158.578	1006.71	638.31
1010.52	128.554	699.443	518.215
1010.52	82.9459	594.854	335.784
1010.53	50.9138	410.204	207.655
1010.53	26.5484	389.955	110.194
1010.54	14.864	324.392	63.4558
1010.54	20.422	129.25	85.6879
1010.54	22.8564	225.086	95.4254
1010.55	12.3297	171.54	53.3187
1010.55	5.72198	147.091	26.8879
1010.56	9.25002	152.443	41.0001
1010.56	6.81691	67.9212	31.2676
1010.57	2.98019	94.268	15.9208
1010.57	4.23857	167.903	20.9543
1010.58	2.99165	187.868	15.9666
1010.58	10.961	111.04	47.8439
1010.59	15.5212	109	66.0849
1010.59	10.7593	144.643	47.0371
1010.59	17.5918	159.901	74.3673
1010.6	21.8652	169.673	91.4609
1010.6	14.9574	137.527	63.8297
1010.61	12.3158	322.769	53.263
1010.61	24.3236	430.874	101.294
1010.62	28.0371	301.596	116.149
1010.62	27.8227	299.778	115.291
1010.63	19.4676	319.018	81.8702
1010.63	17.3057	440.312	73.2228
1010.63	46.8726	294.911	191.49
1010.64	45.4896	405.982	185.958
1010.64	49.0676	519.58	200.271
1010.65	83.4002	648.536	337.601
1010.65	135.85	729.018	547.401
1010.66	230.814	1264.98	927.256
1010.66	586.986	2494.28	2351.94
1010.67	923.203	4682.9	3696.81
1010.67	1404.63	7416.95	5622.51
1010.67	1950.44	9830.73	7805.77
1010.68	2021.38	11152.5	8089.51
1010.68	1744.43	11070.5	6981.74
1010.69	1386.3	8826.65	5549.2
1010.69	918.216	5596.56	3676.86
1010.7	657.024	4625.56	2632.1
1010.7	501.237	3337.42	2008.95
1010.71	452.986	2411.74	1815.94
1010.71	272.997	1735.8	1095.99
1010.72	186.762	1229.93	751.047
1010.72	133.263	904.423	537.052
1010.72	117.206	909.693	472.823
1010.73	76.3968	450.535	309.587
1010.73	62.201	423.025	252.804
1010.74	30.6394	265.172	126.557
1010.74	29.1462	347.094	120.585
1010.75	37.3806	251.966	153.522
1010.75	14.9366	289.199	63.7466
1010.76	11.5993	156.017	50.3974
1010.76	34.7757	296.546	143.103
1010.76	20.3224	247.89	85.2897
1010.77	16.3483	401.837	69.393
1010.77	27.3183	274.504	113.273
1010.78	34.1438	366.696	140.575
1010.78	44.3571	409.445	181.428
1010.79	34.2463	289.465	140.985
1010.79	21.1336	341.249	88.5345
1010.8	26.4316	382.773	109.726
1010.8	31.7976	311.977	131.19
1010.8	47.531	279.807	194.124
1010.81	32.0894	142.637	132.358
1010.81	27.9032	344.084	115.613
1010.82	34.7966	469.492	143.186
1010.82	51.9405	285.233	211.762
1010.83	64.9513	358.769	263.805
1010.83	55.1851	249.564	224.741
1010.84	40.6847	348.827	166.739
1010.84	53.971	426.838	219.884
1010.85	62.2558	386.767	253.023
1010.85	103.152	507.776	416.606
1010.86	153.982	663.634	619.929
1010.86	273.285	1261.09	1097.14
1010.86	595.571	2721.05	2386.28
1010.87	1027.03	4708.54	4112.12
1010.87	1506.42	7367.47	6029.68
1010.88	1733.41	9334.3	6937.62
1010.88	1665.56	9457.59	6666.26
1010.89	1243.45	8710	4977.8
1010.89	1098.12	7001.96	4396.49
1010.89	794.757	4423.77	3183.03
1010.9	496.09	3367.66	1988.36
1010.9	371.581	2392.77	1490.33
1010.91	317.927	1701.43	1275.71
1010.91	218.816	1531.36	879.263
1010.92	165.199	1069.01	664.794
1010.92	128.506	878.303	518.025
1010.93	101.304	668.525	409.218
1010.93	74.9169	569.148	303.668
1010.93	55.5376	478.459	226.15
1010.94	43.3766	451.335	177.506
1010.94	49.1113	380.767	200.445
1010.95	57.4212	414.621	233.685
1010.95	32.8715	321.304	135.486
1010.96	34.7536	266.284	143.014
1010.96	33.6059	306.817	138.424
1010.97	23.5002	153.862	98.0008
1010.97	12.029	160.559	52.1162
1010.98	19.6935	148.713	82.7742
1010.98	33.1018	214.72	136.407
1010.99	17.0014	210.008	72.0058
1010.99	20.8427	313.012	87.3708
1010.99	18.6486	320.921	78.5944
1011	26.8887	159.498	111.555
1011	19.6492	214.621	82.5966
1011.01	30.9135	162.916	127.654
1011.01	38.8745	99.5813	159.498
1011.02	27.5744	186.487	114.298
1011.02	17.9524	200.555	75.8095
1011.02	42.123	205.974	172.492
1011.03	47.2154	179.814	192.862
1011.03	58.8127	179.246	239.251
1011.04	30.9599	290.264	127.84
1011.04	38.1015	300.63	156.406
1011.05	56.096	332.426	228.384
1011.05	85.717	494.571	346.868
1011.06	129.049	686.794	520.194
1011.06	296.552	1019.94	1190.21
1011.07	530.582	2533.04	2126.33
1011.07	859.848	4813.23	3443.39
1011.07	1128.02	6551.21	4516.08
1011.08	1218.03	7545.4	4876.13
1011.08	1178.03	7313.32	4716.12
1011.09	991.311	6034.24	3969.24
1011.09	673.389	4223.56	2697.56
1011.1	468.155	2982.32	1876.62
1011.1	357.162	2046.7	1432.65
1011.11	267.319	1712.13	1073.28
1011.11	203.539	1154.67	818.157
1011.12	146.318	1130.85	589.273
1011.12	106.826	957.141	431.304
1011.12	78.7756	593.041	319.102
1011.13	52.8958	420.565	215.583
1011.13	39.1885	443.04	160.754
1011.14	29.081	412.582	120.324
1011.14	29.9144	355.983	123.658
1011.15	22.6759	214.842	94.7037
1011.15	26.7285	200.103	110.914
1011.15	14.1837	216.451	60.7346
1011.16	10.0294	198.905	44.1176
1011.16	26.4827	160.718	109.931
1011.17	31.1305	114.942	128.522
1011.17	22.1654	128.06	92.6617
1011.18	27.7809	181.419	115.124
1011.18	14.2513	140.97	61.0053
1011.19	28.7253	159.302	118.901
1011.19	16.6701	106.094	70.6804
1011.2	19.0953	103.747	80.3813
1011.2	22.5975	112.917	94.3902
1011.21	12.9619	114.402	55.8474
1011.21	21.5088	151.667	90.0353
1011.21	17.5327	67.4338	74.1309
1011.22	21.1027	86.7194	88.4107
1011.22	19.1027	143.926	80.4108
1011.23	9.71224	178.192	42.8489
1011.23	24.504	140.871	102.016
1011.24	21.9361	151.676	91.7445
1011.24	24.8215	224.284	103.286
1011.25	16.4876	125.724	69.9503
1011.25	25.8073	103.57	107.229
1011.25	50.7697	202.454	207.079
1011.26	127.237	489.866	512.947
1011.26	194.625	1022.27	782.501
1011.27	374.364	2187.26	1501.46
1011.27	628.288	3483.25	2517.15
1011.28	747.137	4331.46	2992.55
1011.28	755.445	4212.91	3025.78
1011.28	665.942	3974.35	2667.77
1011.29	553.825	3543.13	2219.3
1011.29	459.736	2404.08	1842.94
1011.3	292.731	1825.74	1174.93
1011.3	218.455	1211.69	877.819
1011.31	148.413	829.911	597.654
1011.31	128.541	728.711	518.165
1011.32	61.7437	592.818	250.975
1011.32	60.6948	332.202	246.779
1011.33	61.997	220.342	251.988
1011.33	40.1248	180.108	164.499
1011.34	35.3284	198.008	145.314
1011.34	28.3137	113.279	117.255
1011.34	23.9206	149.495	99.6824
1011.35	34.3375	77.4624	141.35
1011.35	35.5869	104.458	146.348
1011.36	32.9043	39.4049	135.617
1011.36	39.6802	122.162	162.721
1011.37	38.3782	123.068	157.513
1011.37	52.3366	177.745	213.346
1011.38	43.8501	240.396	179.4
1011.38	43.3968	251.946	177.587
1011.38	37.3972	380.398	153.589
1011.39	26.6013	280.246	110.405
1011.39	30.2519	280.971	125.008
1011.4	61.1477	318.146	248.591
1011.4	40.407	274.688	165.628
1011.41	53.6099	300.407	218.439
1011.41	50.4105	290.927	205.642
1011.41	44.7993	351.821	183.197
1011.42	35.5312	341.725	146.125
1011.42	48.9813	234.985	199.925
1011.43	68.1244	290.664	276.498
1011.43	43.0948	424.371	176.379
1011.44	32.026	387.362	132.104
1011.44	33.5441	369.956	138.177
1011.45	57.1325	355.87	232.53
1011.45	67.8379	444.582	275.352
1011.46	49.9458	742.353	203.783
1011.46	93.0709	727.806	376.284
1011.47	188.121	1404.65	756.483
1011.47	263.888	1726.71	1059.55
1011.47	391.74	2549.8	1570.96
1011.48	429.313	2636.92	1721.25
1011.48	393.536	2818.81	1578.14
1011.49	435.732	2528.95	1746.93
1011.49	276.717	1867.82	1110.87
1011.5	192.376	1393.45	773.504
1011.5	118.642	935.184	478.57
1011.5	106.366	892.808	429.465
1011.51	83.4904	536.569	337.962
1011.51	49.1443	517.376	200.577
1011.52	51.2264	437.862	208.906
1011.52	34.2266	239.668	140.906
1011.53	26.1731	374.722	108.692
1011.53	13.4152	342.263	57.6606
1011.54	15.4812	187.897	65.9247
1011.54	13.2456	227.827	56.9825
1011.55	6.07254	286.95	28.2902
1011.55	7.88805	215.405	35.5522
1011.55	1.31224	194.659	9.24894
1011.56	14.9537	116.284	63.8147
1011.56	8.79362	101.437	39.1745
1011.57	1.79134	111.723	11.1654
1011.57	1.13909	34.8722	8.55636
1011.58	7.67651	83.2875	34.706
1011.58	3.90457	73.2493	19.6183
1011.59	6.95715	48.211	31.8286
1011.59	7.56952	75.2807	34.2781
1011.6	5.09415	63.8877	24.3766
1011.6	8.60345	78.3027	38.4138
1011.6	11.1288	73.7213	48.5151
1011.61	4.83088	101.946	23.3235
1011.61	5.16956	87.1761	24.6782
1011.62	7.04364	75.8318	32.1746
1011.62	7.78913	121.255	35.1565
1011.63	5.1887	134.762	24.7548
1011.63	10.8781	114.272	47.5126
1011.63	6.44962	150.985	29.7985
1011.64	5.24821	90.7375	24.9928
1011.64	10.5915	169.861	46.3659
1011.65	11.7688	167.742	51.0753
1011.65	22.0782	194.352	92.313
1011.66	42.8525	240.855	175.41
1011.66	66.5101	452.249	270.04
1011.67	87.6538	564.435	354.615
1011.67	140.572	938.2	566.29
1011.68	203.493	1038.19	817.97
1011.68	208.291	1157.89	837.164
1011.68	200.167	1071.35	804.668
1011.69	166.509	988.26	670.034
1011.69	96.9705	877.579	391.882
1011.7	95.072	453.06	384.288
1011.7	55.0562	410.921	224.225
1011.71	52.6269	352.985	214.508
1011.71	34.1864	241.844	140.745
1011.72	30.1782	229.047	124.713
1011.72	19.1544	309.542	80.6174
1011.73	11.2567	162.172	49.0267
1011.73	15.992	119.255	67.9681
1011.73	9.85676	136.151	43.427
1011.74	12.0668	169.301	52.2672
1011.74	14.6169	109.334	62.4678
1011.75	5.45536	96.3819	25.8215
1011.75	10.5154	83.7692	46.0617
1011.76	10.2444	142.276	44.9778
1011.76	10.5296	110.113	46.1184
1011.77	7.7455	108.438	34.982
1011.77	7.8775	109.512	35.51
1011.77	15.8781	110.489	67.5126
1011.78	11.0506	129.75	48.2026
1011.78	5.33118	80.8474	25.3247
1011.79	14.7356	143.696	62.9423
1011.79	17.7443	140.474	74.977
1011.8	4.28599	107.081	21.144
1011.8	7.27822	38.0131	33.1129
1011.81	9.70931	70.9405	42.8373
1011.81	16.9035	84.3182	71.6142
1011.82	20.1741	65.2823	84.6964
1011.82	25.2959	44.1257	105.184
1011.82	16.0714	83.1396	68.2858
1011.83	18.2695	107.145	77.078
1011.83	9.46855	132.999	41.8742
1011.84	6.39091	154.852	29.5636
1011.84	12.9531	90.4211	55.8124
1011.85	26.8993	125.634	111.597
1011.85	31.2324	89.3388	128.929
1011.86	26.3065	71.9803	109.226
1011.86	32.6757	150.201	134.703
1011.86	44.6014	225.113	182.406
1011.87	62.0776	221.341	252.31
1011.87	67.0195	504.818	272.078
1011.88	106.083	571.906	428.333
1011.88	101.142	498.574	408.57
1011.89	105.932	486.271	427.727
1011.89	59.9621	462.31	243.849
1011.9	74.6731	371.084	302.693
1011.9	66.3074	311.122	269.23
1011.9	29.7759	183.532	123.103
1011.91	33.037	174.957	136.148
1011.91	40.0383	117.73	164.153
1011.92	20.2527	124.679	85.0108
1011.92	19.8709	115.686	83.4836
1011.93	22.6145	261.796	94.4581
1011.93	30.8357	137.915	127.343
1011.94	16.7837	218.329	71.1346
1011.94	16.7586	222.595	71.0346
1011.95	24.658	165.022	102.632
1011.95	17.1341	140.201	72.5362
1011.95	24.929	156.2	103.716
1011.96	22.7468	116.455	94.9871
1011.96	11.8873	98.9597	51.5494
1011.97	16.3919	166.522	69.5675
1011.97	7.34371	118.509	33.3748
1011.98	15.7802	67.2558	67.1207
1011.98	19.6897	124.237	82.7587
1011.99	11.5545	29.0393	50.218
1011.99	11.1523	50.7566	48.6092
1011.99	5.3384	49.467	25.3536
1012	4.95286	17.8334	23.8115
1012	6.34352	70.1376	29.3741
1012.01	7.87206	24.5098	35.4883
1012.01	10.6119	1.44096	46.4476
1012.02	9.97316	12.3333	43.8927
1012.02	6.24976	35.2063	28.9991
1012.03	7.55849	31.6173	34.234
1012.03	11.878	62.559	51.512
1012.03	15.4132	62.4216	65.653
1012.04	14.7482	16.8624	62.9928
1012.04	9.48703	27.3333	41.9481
1012.05	12.2925	46.0494	53.1702
1012.05	5.74033	13.6667	26.9613
1012.06	10.4198	2.95064	45.6791
1012.06	18.4166	57.9621	77.6662
1012.07	30.1339	22.44	124.535
1012.07	40.9427	89.5869	167.771
1012.08	24.1154	201.257	100.462
1012.08	32.5707	231.693	134.283
1012.08	27.2679	248.57	113.072
1012.09	21.5768	330.843	90.3073
1012.09	21.2379	272.925	88.9517
1012.1	25.3385	145.983	105.354
1012.1	10.7304	121.832	46.9216
1012.11	13.3234	122.649	57.2937
1012.11	13.7491	121.944	58.9965
1012.12	11.1336	105.318	48.5345
1012.12	14.6853	112.846	62.7413
1012.12	6.12144	125.446	28.4857
1012.13	10.1818	55.0749	44.7272
1012.13	4.86056	135.838	23.4422
1012.14	10.7733	68.1072	47.0931
1012.14	4.56955	49.4391	22.2782
1012.15	2.24446	114.449	12.9778
1012.15	2.00254	49.5487	12.0102
1012.16	2.05534	47.7947	12.2214
1012.16	6.5749	128.122	30.2996
1012.16	4.30359	109.039	21.2143
1012.17	3.22682	131.714	16.9073
1012.17	7.35114	94.4976	33.4046
1012.18	8.79637	106.914	39.1855
1012.18	9.37648	135.435	41.5059
1012.19	14.2432	110.966	60.9727
1012.19	11.6389	57.1482	50.5555
1012.2	13.1803	81.663	56.7214
1012.2	9.81501	72.4433	43.26
1012.21	13.464	139.538	57.8561
1012.21	6.63374	97.3984	30.535
1012.21	10.4291	92.5309	45.7163
1012.22	11.695	64.3132	50.7801
1012.22	11.0281	52.5913	48.1123
1012.23	15.9251	53.1192	67.7005
1012.23	15.0655	84.644	64.2619
1012.24	11.8679	65.295	51.4715
1012.24	11.9349	74.6271	51.7397
1012.25	10.163	65.4741	44.6521
1012.25	13.8972	60.2038	59.5888
1012.25	4.40549	19.3617	21.622
1012.26	8.1433	15.6949	36.5732
1012.26	5.59483	129.754	26.3793
1012.27	8.63475	114.497	38.539
1012.27	6.5495	145.548	30.198
1012.28	8.68696	79.3602	38.7478
1012.28	13.7792	120.346	59.1169
1012.29	14.2393	36.3055	60.9571
1012.29	5.47248	49.4625	25.8899
1012.29	8.46269	80.0771	37.8508
1012.3	7.80147	87.7686	35.2059
1012.3	11.1617	52.8332	48.6466
1012.31	8.88912	68.0935	39.5565
1012.31	7.92255	37.0308	35.6902
1012.32	0.88876	61.0418	7.55503
1012.32	3.14523	55.2644	16.5809
1012.33	2.86472	61.1919	15.4589
1012.33	16.6023	19.0413	70.4092
1012.34	2.28743	120.425	13.1497
1012.34	2.19748	143.005	12.7899
1012.35	7.69286	81.7714	34.7714
1012.35	7.98369	92.8053	35.9348
1012.35	17.014	64.9694	72.0559
1012.36	13.0968	88.0083	56.3873
1012.36	12.1055	72.9698	52.4218
1012.37	17.0038	98.5277	72.0152
1012.37	29.6825	104.724	122.73
1012.38	27.1119	125.348	112.448
1012.38	32.0399	129.679	132.16
1012.38	39.5801	192.46	162.32
1012.39	47.6196	96.3442	194.478
1012.39	23.6665	107.551	98.666
1012.4	30.5465	149.63	126.186
1012.4	40.4302	235.763	165.721
1012.41	33.338	177.132	137.352
1012.41	37.2061	244.078	152.824
1012.42	25.9281	297.828	107.712
1012.42	37.4443	275.656	153.777
1012.42	41.6799	379.29	170.72
1012.43	47.8833	256.399	195.533
1012.43	58.4798	164.927	237.919
1012.44	50.1989	176.319	204.795
1012.44	34.12	289.175	140.48
1012.45	32.8477	260.315	135.391
1012.45	47.2024	319.517	192.81
1012.46	25.4941	169.689	105.976
1012.46	37.0583	170.501	152.233
1012.47	27.9419	189.382	115.768
1012.47	17.9935	253.409	75.9741
1012.48	24.7285	214.345	102.914
1012.48	16.6553	185.71	70.6212
1012.48	33.7015	251.117	138.806
1012.49	26.1711	172.768	108.684
1012.49	19.196	152.916	80.784
1012.5	17.1322	147.443	72.5286
1012.5	6.01243	119.858	28.0497
1012.51	6.21497	60.8405	28.8599
1012.51	9.66488	91.2427	42.6595
1012.51	8.55354	108.663	38.2142
1012.52	7.80926	62.8621	35.2371
1012.52	16.7744	78.5291	71.0977
1012.53	6.54345	81.8867	30.1738
1012.53	-0.18587	28.9936	3.25654
1012.54	-0.20691	76.6638	3.17238
1012.54	11.4393	124.657	49.7571
1012.55	10.1859	102.11	44.7434
1012.55	7.98034	131.312	35.9214
1012.56	2.57466	120.69	14.2986
1012.56	2.81775	81.0473	15.271
1012.57	7.2951	53.6802	33.1804
1012.57	3.34882	59.655	17.3953
1012.57	7.94232	22.3845	35.7693
1012.58	4.382	84.4931	21.528
1012.58	2.65112	41.9481	14.6045
1012.59	4.03035	63.1092	20.1214
1012.59	0.25538	13.5379	5.02153
1012.6	6.32526	63.156	29.3011
1012.6	9.95665	101.144	43.8266
1012.61	7.70182	73.3592	34.8073
1012.61	5.52547	60.3382	26.1019
1012.61	4.66053	85.5821	22.6421
1012.62	2.83703	32.1525	15.3481
1012.62	8.24771	14.9866	36.9909
1012.63	4.41884	89.6389	21.6754
1012.63	7.65521	111.136	34.6208
1012.64	4.89299	81.1056	23.572
1012.64	4.68579	65.7285	22.7431
1012.64	6.77093	65.055	31.0837
1012.65	6.89541	52.5499	31.5816
1012.65	3.67467	57.3725	18.6987
1012.66	8.60933	78.7855	38.4373
1012.66	9.62268	80.0528	42.4907
1012.67	13.5433	84.1447	58.173
1012.67	12.5988	113.225	54.3951
1012.68	10.0672	118.12	44.2689
1012.68	16.4662	110.644	69.8649
1012.69	8.0378	53.8496	36.1512
1012.69	9.94133	89.0286	43.7653
1012.7	11.0057	62.7634	48.0227
1012.7	13.1204	26.2535	56.4814
1012.7	13.0966	91.1211	56.3862
1012.71	6.76978	108.786	31.0791
1012.71	12.5359	39.9362	54.1435
1012.72	16.958	91.4411	71.832
1012.72	19.911	124.312	83.6439
1012.73	15.9535	119.491	67.814
1012.73	16.7299	155.494	70.9197
1012.74	7.44182	120.226	33.7673
1012.74	12.8402	144.814	55.3609
1012.74	15.2265	137.285	64.9061
1012.75	15.2041	98.1806	64.8163
1012.75	12.6216	168.335	54.4862
1012.76	11.1821	92.847	48.7282
1012.76	15.5425	106.795	66.1698
1012.77	12.3102	109.691	53.2408
1012.77	32.3142	91.8854	133.257
1012.78	24.5851	42.2714	102.341
1012.78	7.80164	66.0716	35.2066
1012.78	11.9369	45.7394	51.7475
1012.79	9.40701	107.705	41.628
1012.79	13.6922	74.003	58.769
1012.8	23.1713	59.8985	96.6853
1012.8	6.78811	113.915	31.1524
1012.81	5.18692	54.4239	24.7477
1012.81	15.7983	61.7355	67.1932
1012.82	13.6119	36.2113	58.4477
1012.82	17.8641	49.6164	75.4563
1012.83	12.998	40.0545	55.992
1012.83	4.74416	46.3073	22.9766
1012.83	5.66207	51.4522	26.6483
1012.84	9.15623	47.3898	40.6249
1012.84	4.53572	26.6008	22.1429
1012.85	2.04034	55.2533	12.1614
1012.85	2.54062	23.0626	14.1625
1012.86	6.27304	54.5597	29.0922
1012.86	10.0133	46.1959	44.0532
1012.87	8.59422	19.7513	38.3769
1012.87	17.6528	60.1877	74.6111
1012.87	35.8686	64.7061	147.475
1012.88	35.1881	116.66	144.752
1012.88	32.8826	84.0373	135.53
1012.89	32.939	99.7732	135.756
1012.89	25.4437	88.4028	105.775
1012.9	16.7971	79.6044	71.1883
1012.9	27.9717	113.287	115.887
1012.91	25.739	82.1623	106.956
1012.91	12.1972	76.2435	52.7887
1012.91	23.2004	96.1804	96.8016
1012.92	32.3934	131.275	133.574
1012.92	18.657	119.1	78.6279
1012.93	16.0357	138.4	68.1428
1012.93	18.3433	154.937	77.373
1012.94	20.6843	136.053	86.7374
1012.94	20.7001	95.761	86.8002
1012.95	18.0172	158.438	76.0689
1012.95	21.7455	93.3823	90.9821
1012.96	15.1386	132.681	64.5545
1012.96	11.6032	217.669	50.413
1012.96	19.9293	122.955	83.7173
1012.97	17.8819	102.966	75.5277
1012.97	20.6884	57.4361	86.7536
1012.98	7.0721	70.1347	32.2884
1012.98	6.08433	25.7994	28.3373
1012.99	4.7931	78.9741	23.1724
1012.99	3.75519	53.7774	19.0208
1013	5.56612	33.0254	26.2645
1013	7.1038	48.2944	32.4152
1013	10.6756	8.70562	46.7023
1013.01	6.54384	86.3617	30.1753
1013.01	13.3894	80.9901	57.5576
1013.02	6.54846	44.6739	30.1939
1013.02	7.7607	82.5352	35.0428
1013.03	12.1629	96.5942	52.6515
1013.03	22.3553	44.071	93.4211
1013.04	22.2777	58.074	93.1107
1013.04	19.6047	81.8691	82.4188
1013.04	19.0922	64.0457	80.3688
1013.05	5.85309	49.8159	27.4124
1013.05	4.88139	19.3106	23.5256
1013.06	9.37771	60.5104	41.5108
1013.06	14.3953	99.5214	61.5812
1013.07	5.01887	151.183	24.0755
1013.07	4.06207	266.265	20.2483
1013.08	11.1342	316.697	48.5367
1013.08	16.4907	320.849	69.963
1013.09	12.1888	272.333	52.7553
1013.09	4.83126	302.15	23.3251
1013.1	10.7776	261.159	47.1104
1013.1	6.77122	145.513	31.0849
1013.1	10.2712	128.558	45.0848
1013.11	7.24362	135.224	32.9745
1013.11	2.61965	187.249	14.4786
1013.12	6.58231	116.887	30.3292
1013.12	6.76353	112.584	31.0541
1013.13	5.44538	106.499	25.7815
1013.13	7.16606	37.2714	32.6642
1013.13	11.5312	96.5352	50.1246
1013.14	4.16068	94.0518	20.6427
1013.14	3.79343	104.155	19.1737
1013.15	12.5176	88.3788	54.0705
1013.15	4.85366	64.4688	23.4146
1013.16	2.36196	60.8601	13.4479
1013.16	1.07035	101.786	8.28141
1013.17	4.06049	65.7436	20.2419
1013.17	-0.41447	32.7192	2.34214
1013.17	8.33378	76.2088	37.3351
1013.18	3.81636	50.3514	19.2655
1013.18	2.70113	37.4368	14.8045
1013.19	-0.49333	54.6346	2.02668
1013.19	6.22657	80.7735	28.9063
1013.2	16.962	10.1521	71.848
1013.2	7.37386	52.2985	33.4954
1013.21	1.9994	45.9663	11.9976
1013.21	2.76208	61.4911	15.0483
1013.22	4.68474	8.91073	22.739
1013.22	0.1479	57.7561	4.5916
1013.23	2.72853	94.1264	14.9141
1013.23	4.19181	73.1417	20.7672
1013.23	2.35673	8.64258	13.4269
1013.24	2.29015	49.004	13.1606
1013.24	2.8852	97.5167	15.5408
1013.25	16.7979	59.7222	71.1918
1013.25	8.37607	32.3643	37.5043
1013.26	15.3467	51.7674	65.3868
1013.26	12.8585	61.209	55.434
1013.26	11.612	113.706	50.448
1013.27	13.711	89.5066	58.8441
1013.27	26.6744	115.138	110.698
1013.28	15.6336	125.628	66.5344
1013.28	27.7848	92.1663	115.139
1013.29	17.7209	33.2676	74.8835
1013.29	14.3018	54.0823	61.2071
1013.3	19.0218	72.3048	80.0871
1013.3	19.0295	93.5527	80.1178
1013.31	14.3728	87.9784	61.4911
1013.31	12.3066	92.747	53.2263
1013.32	5.39022	51.9589	25.5609
1013.32	11.057	94.1663	48.2281
1013.32	12.2849	57.7743	53.1397
1013.33	18.7303	104.947	78.9211
1013.33	18.6306	99.7985	78.5222
1013.34	11.9575	86.4208	51.8299
1013.34	10.1667	70.792	44.6666
1013.35	16.6384	163.841	70.5534
1013.35	9.00872	119.661	40.0349
1013.36	9.77444	109.333	43.0978
1013.36	16.7013	162.886	70.805
1013.36	13.3689	176.61	57.4754
1013.37	13.0663	124.982	56.2653
1013.37	18.4363	166.439	77.7453
1013.38	37.758	216.035	155.032
1013.38	36.3379	265.734	149.352
1013.39	33.6033	308.459	138.413
1013.39	33.7347	462.147	138.939
1013.39	32.7681	443.872	135.072
1013.4	41.8398	250.589	171.359
1013.4	30.7279	323.558	126.911
1013.41	35.0997	458.362	144.399
1013.41	42.0444	480.026	172.177
1013.42	40.2112	518.469	164.845
1013.42	39.1702	640.349	160.681
1013.43	38.3585	403.648	157.434
1013.43	51.5156	477.482	210.063
1013.44	39.8328	383.658	163.331
1013.44	55.1567	250.538	224.627
1013.45	62.3173	443.471	253.269
1013.45	53.9449	438.53	219.78
1013.45	75.7558	778.653	307.023
1013.46	124.861	893.934	503.443
1013.46	168.762	1612.5	679.049
1013.47	255.981	2090.25	1027.92
1013.47	336.729	2971.93	1350.92
1013.48	353.547	3614	1418.19
1013.48	316.064	3201.48	1268.25
1013.49	236.506	2613.82	950.023
1013.49	191.418	2052.66	769.673
1013.49	124.175	1790.01	500.699
1013.5	94.5765	1475.58	382.306
1013.5	76.9655	1225.71	311.862
1013.51	60.3033	1125.41	245.213
1013.51	40.868	696.785	167.472
1013.52	41.0264	632.157	168.106
1013.52	31.4038	464.729	129.615
1013.53	27.2613	449.347	113.045
1013.53	19.6697	326.083	82.6788
1013.53	21.0314	182.665	88.1255
1013.54	18.4706	139.547	77.8824
1013.54	5.57121	144.965	26.2848
1013.55	9.71376	115.828	42.855
1013.55	16.4681	81.2677	69.8723
1013.56	9.36417	31.0481	41.4567
1013.56	8.41682	67.8556	37.6673
1013.57	20.0794	31.0262	84.3177
1013.57	24.9212	121.247	103.685
1013.58	12.3644	84.0326	53.4578
1013.58	13.9538	57.256	59.8152
1013.58	21.8094	42.6361	91.2375
1013.59	16.5938	95.1291	70.3753
1013.59	7.07062	96.2147	32.2825
1013.6	13.4064	199.732	57.6255
1013.6	9.80506	145.786	43.2203
1013.61	9.87811	44.8401	43.5124
1013.61	9.11649	56.0849	40.4659
1013.62	12.7003	67.1329	54.8013
1013.62	12.9982	103.661	55.9926
1013.62	14.6238	58.553	62.495
1013.63	21.0586	173.505	88.2344
1013.63	19.3661	162.903	81.4644
1013.64	16.0516	189.155	68.2062
1013.64	33.11	260.899	136.44
1013.65	38.7677	271.987	159.071
1013.65	77.1659	548.174	312.663
1013.66	139.723	1248.65	562.893
1013.66	283.642	2744.54	1138.57
1013.66	506.001	4398.12	2028
1013.67	672.46	6036.34	2693.84
1013.67	804.616	7592.26	3222.47
1013.68	804.842	8372.58	3223.37
1013.68	724.172	7447.55	2900.69
1013.69	535.827	5785.13	2147.31
1013.69	374.992	3766.63	1503.97
1013.7	260.181	2822.2	1044.72
1013.7	217.494	2231.86	873.975
1013.71	155.321	1551.01	625.284
1013.71	117.944	1158.11	475.777
1013.71	82.6184	928.28	334.473
1013.72	67.9689	743.319	275.875
1013.72	49.636	811.17	202.544
1013.73	39.2707	662.612	161.083
1013.73	24.6303	365.951	102.521
1013.74	29.5124	365.446	122.049
1013.74	27.6738	274.961	114.695
1013.75	24.7982	241.323	103.193
1013.75	27.0734	204.436	112.294
1013.75	32.6365	236.918	134.546
1013.76	23.9366	118.899	99.7465
1013.76	25.3795	177.222	105.518
1013.77	29.5842	167.816	122.337
1013.77	15.6689	163.837	66.6755
1013.78	19.8754	132.789	83.5014
1013.78	19.7967	143.741	83.1866
1013.79	19.9584	158.973	83.8336
1013.79	23.7192	201.363	98.877
1013.79	22.1948	218.924	92.7792
1013.8	16.5402	287.625	70.1608
1013.8	19.7412	317.249	82.965
1013.81	27.9278	320.287	115.711
1013.81	11.4624	238.552	49.8494
1013.82	6.65315	413.999	30.6126
1013.82	21.6364	275.082	90.5454
1013.83	30.7985	97.4424	127.194
1013.83	23.1372	74.8025	96.5489
1013.84	23.7012	143.766	98.8049
1013.84	32.0227	364.11	132.091
1013.85	33.0335	526.472	136.134
1013.85	72.782	372.45	295.128
1013.85	105.131	910.03	424.524
1013.86	240.144	1801.16	964.575
1013.86	424.897	3118.78	1703.59
1013.87	712.554	5849.25	2854.22
1013.87	972.063	8862.33	3892.25
1013.88	1068.1	10941.1	4276.39
1013.88	1022.14	11118.6	4092.56
1013.88	846.663	9338.33	3390.65
1013.89	636.557	6989.78	2550.23
1013.89	445.757	5824.66	1787.03
1013.9	327.044	4134.91	1312.18
1013.9	239.374	2633.09	961.496
1013.91	183.432	1754.5	737.728
1013.91	139.669	1305.85	562.676
1013.92	122.046	1198.41	492.186
1013.92	96.3359	946.378	389.344
1013.93	60.875	838.358	247.5
1013.93	58.2545	727.172	237.018
1013.93	41.7159	598.565	170.864
1013.94	38.9015	521.55	159.606
1013.94	27.4255	287.79	113.702
1013.95	27.9471	146.491	115.788
1013.95	20.3833	231.739	85.5332
1013.96	20.4215	225.878	85.6859
[truncated: 1,349 more rows]
