# Supplementary material for: Air pollution particles hijack peroxidasin to disrupt immunosurveillance and promote lung cancer
Source: eLife journal article supplement (doi:10.7554/elife.75345), 2022-04-07
Supplement: supp [file elife-75345-supp-v1.zip › elife_poa_e75345_Figure_4_source_data_2.xlsx]

## Sheet: 4F
Change of Enzyme Activity
PBS	PM1	TSP
1.21897	9.22905	3.36314
1.01056	11.2554	3.49473
1.1596	8.75468	4.75468

## Sheet: 4G
	V0(nM/min)
H2O2 (μm)	PBS	PM1	TSP
0.25	1.12	1.12	0.448
0.5	1.12	2.24	2.24
1	2.24	3.36	3.36
2	2.24	3.36	4.48
4	5.6	15.6	9.3978
10	12.72	44.8	15.1512
20	21.2	69.6	28.4042
50	53.1892	92.6491	68
100	56	100.8	78.4
200	56	100.8	78.4

## Sheet: 4H
Bromohydrin/NADH
PBS	PM1	TSP			Dunnett's multiple comparisons test	Mean Diff.	95.00% CI of diff.	Significant?	Summary	Adjusted P Value
0.047604	0.152672	0.106462
0.025674	0.174522	0.147492			PBS vs. PM1	-0.1159	-0.1574 to -0.07442	Yes	***	0.0004
0.064594	0.15844	0.120118			PBS vs. TSP	-0.07873	-0.1202 to -0.03723	Yes	**	0.0029

## Sheet: 4L
Times (s)	Bleached			Unleached
0	100	100	100	100	100	100
9	99.7394	100.216	99.9775	99.2719	100.73	100.001
19	99.9099	100.833	100.371	99.9587	100.256	100.107
29	100.116	101.308	100.712	100.603	99.7372	100.17
39	100.112	100.488	100.3	99.7012	98.8315	99.2664
49	0	0	0	100	100.083	100.041
59	19.0006	10.779	14.8898	99.7103	100	99.8551
69	29.2476	16.4999	22.8737	99.5711	99.8148	99.6929
79	37.7951	27.118	32.4566	99.8794	99.8029	99.8411
89	40.1345	33.9522	37.0433	99.5488	99.6367	99.5927
99	45.6051	36.0694	40.8372	99.762	99.5364	99.6492
109	46.2957	41.964	44.1299	99.6338	100.376	100.005
119	48.5085	38.6563	43.5824	99.5497	100.555	100.052
129	50.9383	40.455	45.6966	99.7977	100.618	100.208
138	66.3376	44.9113	55.6245	99.6514	100.904	100.278
