# Supplementary material for: Air pollution particles hijack peroxidasin to disrupt immunosurveillance and promote lung cancer
Source: eLife journal article supplement (doi:10.7554/elife.75345), 2022-04-07
Supplement: supp [file elife-75345-supp-v1.zip › elife_poa_e75345_Figure_5_source_data_1.xlsx]

## Sheet: 5A
	shNC					shPXDN
PM1	38.448	32.4501	39.6955	44.7439	37.1798	26.8057	18.3166	25.3091	13.6628	16.7633
TSP	38.1197	49.1264	30.2544	39.6904	43.596	21.0832	19.444	27.0841	18.8445	22.617
Sidak's multiple comparisons test	Mean Diff.	95.00% CI of diff.	Significant?	Summary	Adjusted P Value
shNC - shPXDN
PM1	18.33	7.544 to 29.12	Yes	**	0.0032
TSP	18.34	7.555 to 29.13	Yes	**	0.0032

## Sheet: 5B
	Displacement (μm)						Distance (μm)						Velocity (μm/s)
Time (s)	shNC	shPXDN	shNC	shPXDN		Time (s)	shNC	shPXDN	shNC	shPXDN		Time (s)	shNC	shPXDN	shNC	shPXDN
0	0	0	0	0		0	0	0	0	0		0	0	0	0	0
3	0.128429	0.800555	0.655526	0.787844		3	0.38	2.43	0.34	1.96		3	0.113539	0.560101	0.101292	0.152328
6	0.0812225	0.977816	0.618423	1.27879		6	0.56	2.67	0.41	2.41		6	0.263685	0.560101	0.181196	1.26074
9	0.207084	1.82668	0.938572	1.86054		9	0.94	3.9	0.82	3.96		9	0.184524	0.560101	0.181196	0.430847
12	0.229741	2.00365	0.996854	2.4036		12	1.32	5.99	1.22	4.54		12	0.0240849	1.1202	0.181196	0.430847
15	0.256858	2.2297	1.31105	2.84901		15	1.66	6.53	2.04	5.4		15	0.0761638	1.25243	0.362391	0.888216
18	0.437405	2.06197	0.996854	3.06107		18	2.18	7.08	2.04	7.54		18	0.0772821	0.792104	0.163328	1.18972
21	0.437405	2.69331	1.09936	3.40272		21	2.18	7.56	2.62	7.83		21	0.125399	0.792104	0.256249	1.07712
24	0.473618	2.81762	1.00727	3.83793		24	2.42	8.61	3.19	8.17		24	0.0486779	0.792104	0.256249	1.5422
27	0.591322	3.46837	1.3156	4.04832		27	2.96	9.3	3.6	8.68		27	0.29792	1.25243	0.181196	0.396572
30	0.701074	3.92482	1.63881	3.72908		30	3.34	9.81	4.01	8.84		30	0.181528	0.792104	0.181196	1.58629
33	0.726495	4.0384	1.97869	3.28491		33	3.96	10.39	4.01	9.31		33	0.229898	0.792104	0.186772	0.867659
36	0.770566	4.3776	1.83144	3.79256		36	4.3	10.97	4.58	10.11		36	0.217101	0.792104	0.256249	0.64227
39	0.876703	4.57062	1.86694	5.1939		39	4.68	11.14	4.58	11.08		39	0.329188	0.792104	0.256249	0.258907
42	0.976386	4.69719	2.05271	4.61075		42	5.02	11.5	4.99	12.14		42	0.332233	0.792104	0.181196	1.38684
45	1.14869	4.8239	1.75149	4.32902		45	5.72	12.64	5.4	12.33		45	0.102342	0.560101	0.181196	0.454153
48	1.16296	5.04101	1.65332	5.22826		48	5.96	12.87	5.81	13.17		48	0.207227	0.560101	0.181196	0.867659
51	0.993995	5.13762	1.63881	5.3356		51	6.46	13.19	6.22	13.94		51	0.118061	1.25243	0.181196	0.481701

## Sheet: 5E
Grade Analysis												Sidak's multiple comparisons test	Mean Diff.	95.00% CI of diff.	Significant?	Summary	Adjusted P Value
	shNC					shPXDN
PM1	0.5	0.333333	0.714286	0.75	0.559524	0	0.25	0.25	0	0.1		shNC - shPXDN
TSP	0.363636	0.333333	0.428571	0.375	0.5	0	0	0.25	0.25	0.1		PM1	0.4514	0.2196 to 0.6833	Yes	**	0.0014
												TSP	0.2801	0.04823 to 0.512	Yes	*	0.0212

## Sheet: 5D
IFN-γ+CD8+/CD3+CD45+ Cells												Sidak's multiple comparisons test	Mean Diff.	95.00% CI of diff.	Significant?	Summary	Adjusted P Value
	shNC					shPXDN
PM 1	6.02053	6.64092	5.40015	4.42728	5.5348	17.4588	16.6044	20.235	18.3024	16.6392		shNC - shPXDN
TSP	8.8	9.708	7.60128	6.1008	5.8196	18.9792	16.093	17.365	17.0316	15.065		PM 1	-12.24	-14.57 to -9.921	Yes	****	<0.0001
												TSP	-9.301	-11.62 to -6.978	Yes	****	<0.0001

## Sheet: 5F
LLC Model Tumor Burden (%)												Sidak's multiple comparisons test	Mean Diff.	95.00% CI of diff.	Significant?	Summary	Adjusted P Value
	shNC					shPXDN
PM1	41.6946	36.6009	43.6573	50.9952	43.7981	24.8203	23.1866	24.7117	11.3582	26.8948		shNC - shPXDN
TSP	64.9968	54.9671	46.9065	49.1145	55.9516	26.4216	13.7943	18.3186	20.108	22.3701		PM1	21.15	10.8 to 31.51	Yes	**	0.001
												TSP	34.18	23.83 to 44.53	Yes	****	<0.0001
AdCre Model Tumor Burden (%)												Sidak's multiple comparisons test	Mean Diff.	95.00% CI of diff.	Significant?	Summary	Adjusted P Value
	shNC					shPXDN
PM1	46.9065	57.4185	57.4572	66.8594	49.1145	11.0681	24.5379	20.4645	30.061	20.5646		shNC - shPXDN
TSP	38.1775	59.982	52.1818	41.7537	51.5871	23.9491	18.9814	25.4797	26.1898	17.803		PM1	34.21	23.73 to 44.7	Yes	****	<0.0001
												TSP	26.26	15.77 to 36.74	Yes	***	0.0003

## Sheet: 5G
LLC Model: Number of Tumor												Dunnett's multiple comparisons test	Mean Diff.	95.00% CI of diff.	Significant?	Summary	Adjusted P Value
	PBS			MMZ			PHG
PM 1	12	11	12	3	3	5	2	2	1			PM 1
TSP	8	9	9.5	4	2	3	1	1	4			PBS vs. MMZ	8	5.86 to 10.14	Yes	****	0.0001
												PBS vs. PHG	10	7.86 to 12.14	Yes	****	0.0001
												TSP
												PBS vs. MMZ	5.833	3.693 to 7.974	Yes	****	0.0001
												PBS vs. PHG	6.833	4.693 to 8.974	Yes	****	0.0001
LLC Model: Tumor Burden (%)												Dunnett's multiple comparisons test	Mean Diff.	95.00% CI of diff.	Significant?	Summary	Adjusted P Value
	PBS			MMZ			PHG
PM 1	71.1769	62.7102	57.8131	6.631	11.3209	7.9411	13.6039	12.7773	14.4305			PM 1
TSP	55.7403	67.2355	58.5648	12.843	9.256	16.43	15.0429	12.843	17.2428			PBS vs. MMZ	55.27	46.69 to 63.85	Yes	****	0.0001
												PBS vs. PHG	50.3	41.71 to 58.88	Yes	****	0.0001
												TSP
												PBS vs. MMZ	47.67	39.09 to 56.25	Yes	****	0.0001
												PBS vs. PHG	45.47	36.89 to 54.05	Yes	****	0.0001

## Sheet: 5H
LLC Model: Percent survival (%)
	TSP			PM1
Days	PBS	PHG	MMZ	PBS	PHG	MMZ
28	1
31	1
34	1
35	1
38	1
39	1
47	1
50	1
53	1
24				1
27				1
28				1
30				1
37				1
44				1
48				1
50				1
51				1
52				1
28					1
37					1
38					1
39					1
39					1
42					1
45					1
50					1
54					1
55					1
33						1
35						1
36						1
40						1
47						1
49						1
50						1
54						1
54						1
62						1
33		1
39		1
39		1
42		1
44		1
48		1
53		1
57		1
58		1
58		1
33			1
36			1
37			1
39			1
41			1
44			1
52			1
56			1
56			1
61			1

## Sheet: 5I
AdCre Model: Number of Tumor												Dunnett's multiple comparisons test	Mean Diff.	95.00% CI of diff.	Significant?	Summary	Adjusted P Value
	PBS			MMZ			PHG
PM 1	20	22	23	10	18	12	15	9	13			PM 1
TSP	21	26	24	10	12	16	10	16	13			PBS vs. MMZ	8.333	2.222 to 14.44	Yes	**	0.0096
												PBS vs. PHG	9.333	3.222 to 15.44	Yes	**	0.0046
												TSP
												PBS vs. MMZ	11	4.889 to 17.11	Yes	**	0.0014
												PBS vs. PHG	10.67	4.556 to 16.78	Yes	**	0.0017
AdCre Model: Tumor Burden (%)												Dunnett's multiple comparisons test	Mean Diff.	95.00% CI of diff.	Significant?	Summary	Adjusted P Value
	PBS			MMZ			PHG
PM 1	67.8279	68.3953	53.8932	15.3916	10.7281	20.0551	19.3541	27.1964	20.5118			PM 1
TSP	67.0893	68.9419	50.4847	26.3185	30.167	22.47	25.73	32.18	19.28			PBS vs. MMZ	47.98	34.35 to 61.61	Yes	****	0.0001
												PBS vs. PHG	41.02	27.39 to 54.64	Yes	****	0.0001
												TSP
												PBS vs. MMZ	35.85	22.23 to 49.48	Yes	****	0.0001
												PBS vs. PHG	36.44	22.82 to 50.07	Yes	****	0.0001

## Sheet: 5J
AdCre Model: Percent survival (%)
	TSP			PM1
Days	PBS	PHG	MMZ	PBS	PHG	MMZ
64
69
97
99
104
109
114
58				1
60				1
63				1
67				1
82				1
90				1
92				1
56	1
63	1
68	1
71	1
74	1
84	1
86	1
67					1
81					1
97					1
100					1
103					1
110					1
116					1
79						1
83						1
92						1
105						1
109						1
109						1
113						1
68		1
78		1
94		1
101		1
109		1
116		1
119		1
66			1
76			1
82			1
92			1
97			1
101			1
112			1
