# Supplementary material for: Air pollution particles hijack peroxidasin to disrupt immunosurveillance and promote lung cancer
Source: eLife journal article supplement (doi:10.7554/elife.75345), 2022-04-07
Supplement: supp [file elife-75345-supp-v1.zip › elife_poa_e75345_Supplementary_file_1.docx]

***Supplementary Information***

**Air Pollution Particles Hijack Peroxidasin to Disrupt Immunosurveillance and Promote Lung Cancer**

Zhenzhen Wang1, 2, Ziyu Zhai1, Chunyu Chen1, Xuejiao Tian1, Zhen Xing1, Panfei Xing2, Yushun Yang1, Junfeng Zhang1, *, Chunming Wang2, *, Lei Dong1, 3 *

1. State Key Laboratory of Pharmaceutical Biotechnology, School of Life Sciences, Nanjing University, Nanjing, Jiangsu 210023, China.

2. State Key Laboratory of Quality Research in Chinese Medicine, Institute of Chinese Medical Sciences, University of Macau, Taipa, Macau SAR.

3. Chemistry and Biomedicine Innovative Center, Nanjing University, Nanjing, Jiangsu 210023, China.

* Corresponding Authors:

L.D., Email: [leidong@nju.edu.cn](mailto:leidong@nju.edu.cn); C. W., Email: [cmwang@umac.mo](mailto:cmwang@umac.mo); J. Z., Email: [jfzhang@nju.edu.cn](mailto:jfzhang@nju.edu.cn).

TABLE OF CONTENT

[1. Characterization of FPM. 1](#_Toc83997229)

[2. Effect of FPM on Lung Tumorigenesis. 2](#_Toc83997230)

[3. Effect of FPM on Tumor Cells or Cytotoxic T Lymphocytes. 2](#_Toc83997231)

[4. Effect of FPM on CTLs’ Migration Potential. 5](#_Toc83997232)

[5. Effect of FPM on Lung Structure. 6](#_Toc83997233)

[6. The Effect of FPM on Col IV Crosslink. 11](#_Toc83997234)

[7. Detection of Tryptic Peptides Containing Crosslink Site. 12](#_Toc83997235)

[8. Preparation and Characterization of Protein Corona. 13](#_Toc83997238)

[9. Effect of FPM on PXDN’s Enzymatic Activity and Phase Separation. 13](#_Toc83997241)

[10. Effect of PXDN Inhibitor on Lung Tissue Microenvironment and Lung Tumorigenesis. 15](#_Toc83997244)

[10.1 Effect of PXDN Inhibitor on Lung Tissue Structure. 16](#_Toc83997245)

[10.2 Effect of PXDN Inhibitor on T Cell Migration. 17](#_Toc83997250)

[10.3 Effect of PXDN Inhibitor on Lung Tumorgenesis. 17](#_Toc83997253)

[11. Supplementary Reference 18](#_Toc83997258)

1. **Characterization of FPM.**

| **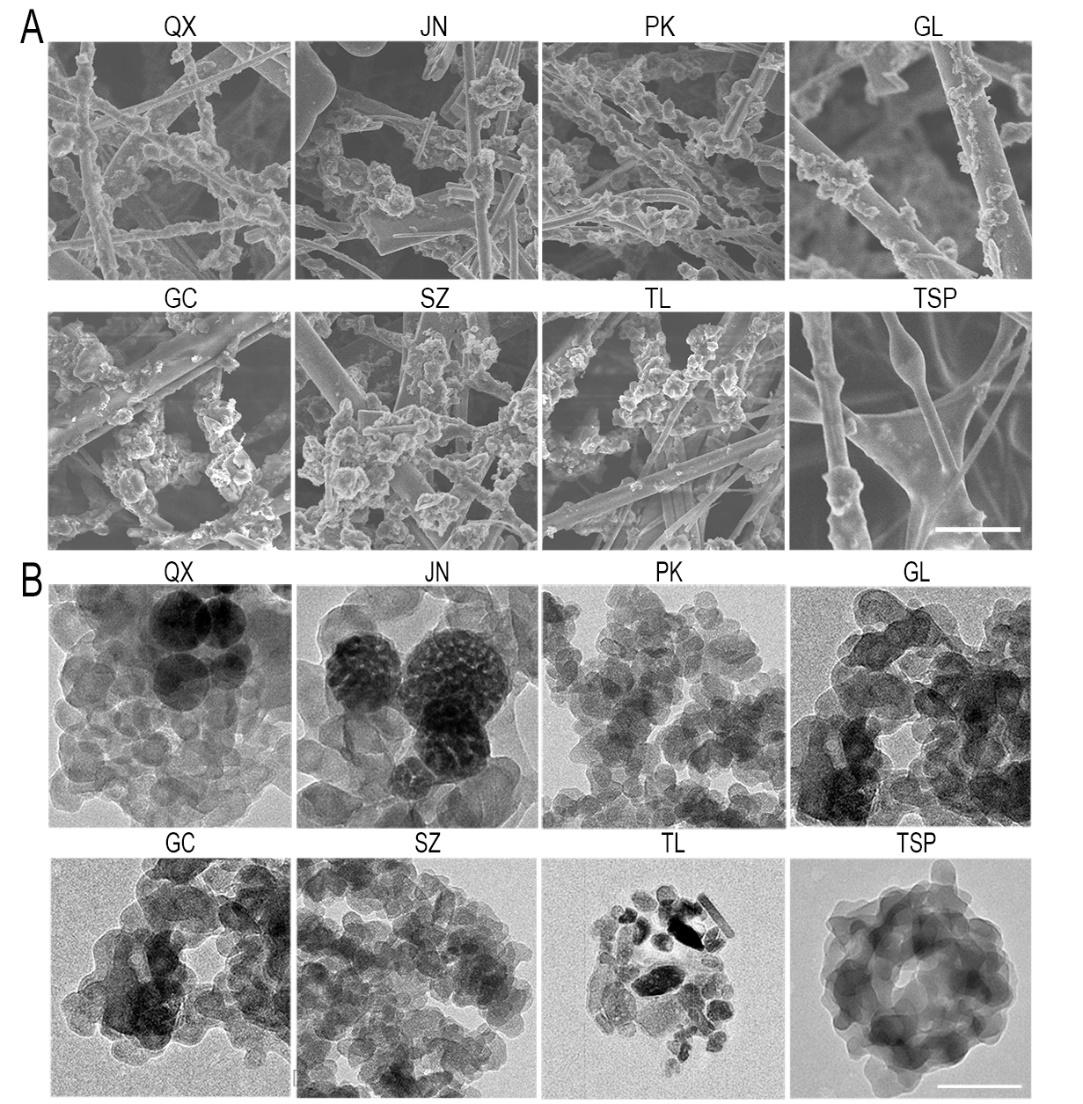** |
| --- |
| **Figure 1—figure supplement 1.** A. Representative scanning electronic microscope (SEM) for particles detained on the fiber filter membrane, which were collected from airborne pollution in 7 different locations, including Nanjing City (Qixia, Jiangning, Pukou, Gulou, and Gaochun) in Jiangsu Province, Suzhou City in Anhui Province and Tieling City in Liaoning Province (named as: QX, JN, PK, GL, GC, SZ and TL) and tobacco smoke particle (TSP). Scale bar = 5 μm; B. Representative transmission electron microscopy (TEM) images for detached particles from filter membrane in panel A. Scale bar = 100 nm. Images are representative for three independent experiments. |

1. **Effect of FPM on Lung Tumorigenesis.**

| **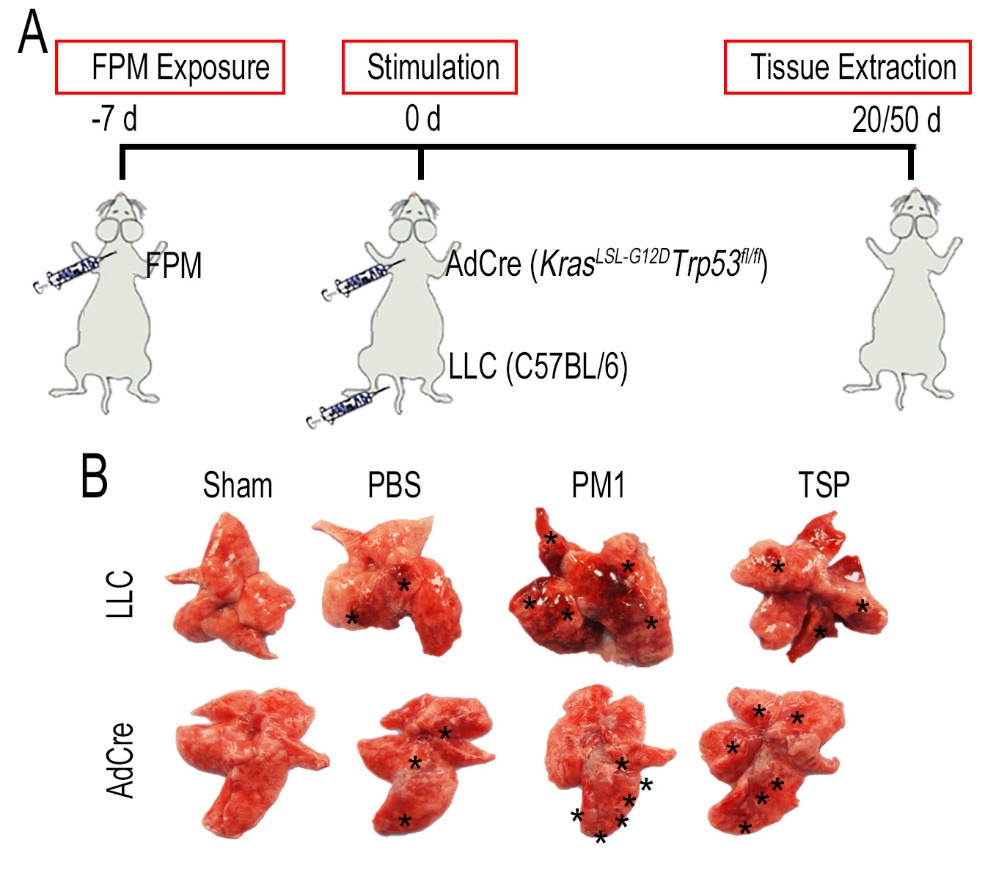** |
| --- |
| **Figure 1—figure supplement 2. A.** Schematic diagram of Lewis lung carcinoma (LLC)-stimulated or *KrasG12DTrp53-/-*-transgenic lung cancer model with FPM exposure; **B.** Gross lung tissue images in the FPM-exposed mice of LLC model or *KrasG12DTrp53-/-*- model 20 days or 50 days after mice were stimulated with LLC or Cre-inducible adevirus (AdCre). The tumor sites were labelled with black asterisk. |

1. **Effect of FPM on Tumor Cells or Cytotoxic T** **Lymphocytes.**

| **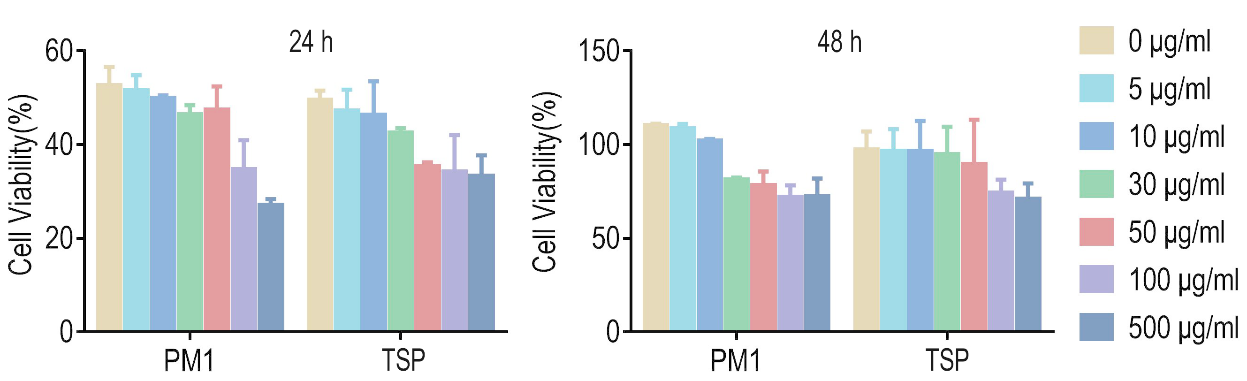** |
| --- |
| **Figure 1—figure supplement 3.** Cell cytotoxic analysis of LLC cells stimulated with a serial concentration of FPM (0, 5, 10, 30, 50, 100 and 500 μg/mL) for 24 h and 48 h. n=3. Results are shown as mean ± SD. |

| **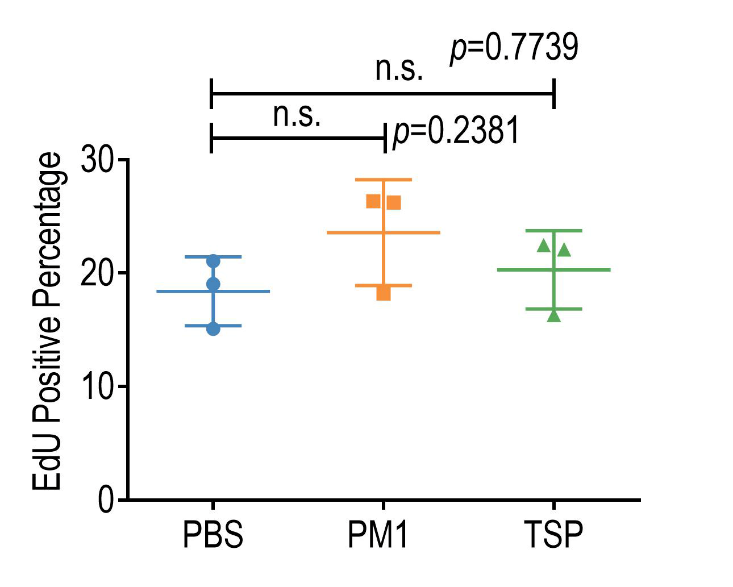** |
| --- |
| **Figure 1—figure supplement 4.** The quantified analysis of EdU-positive cells in tumor site of lung tissue of LLC model 20 days after tumor initiation. n=3. Results are shown as mean ± SD. n.s. indicates no statistical significance. |

| **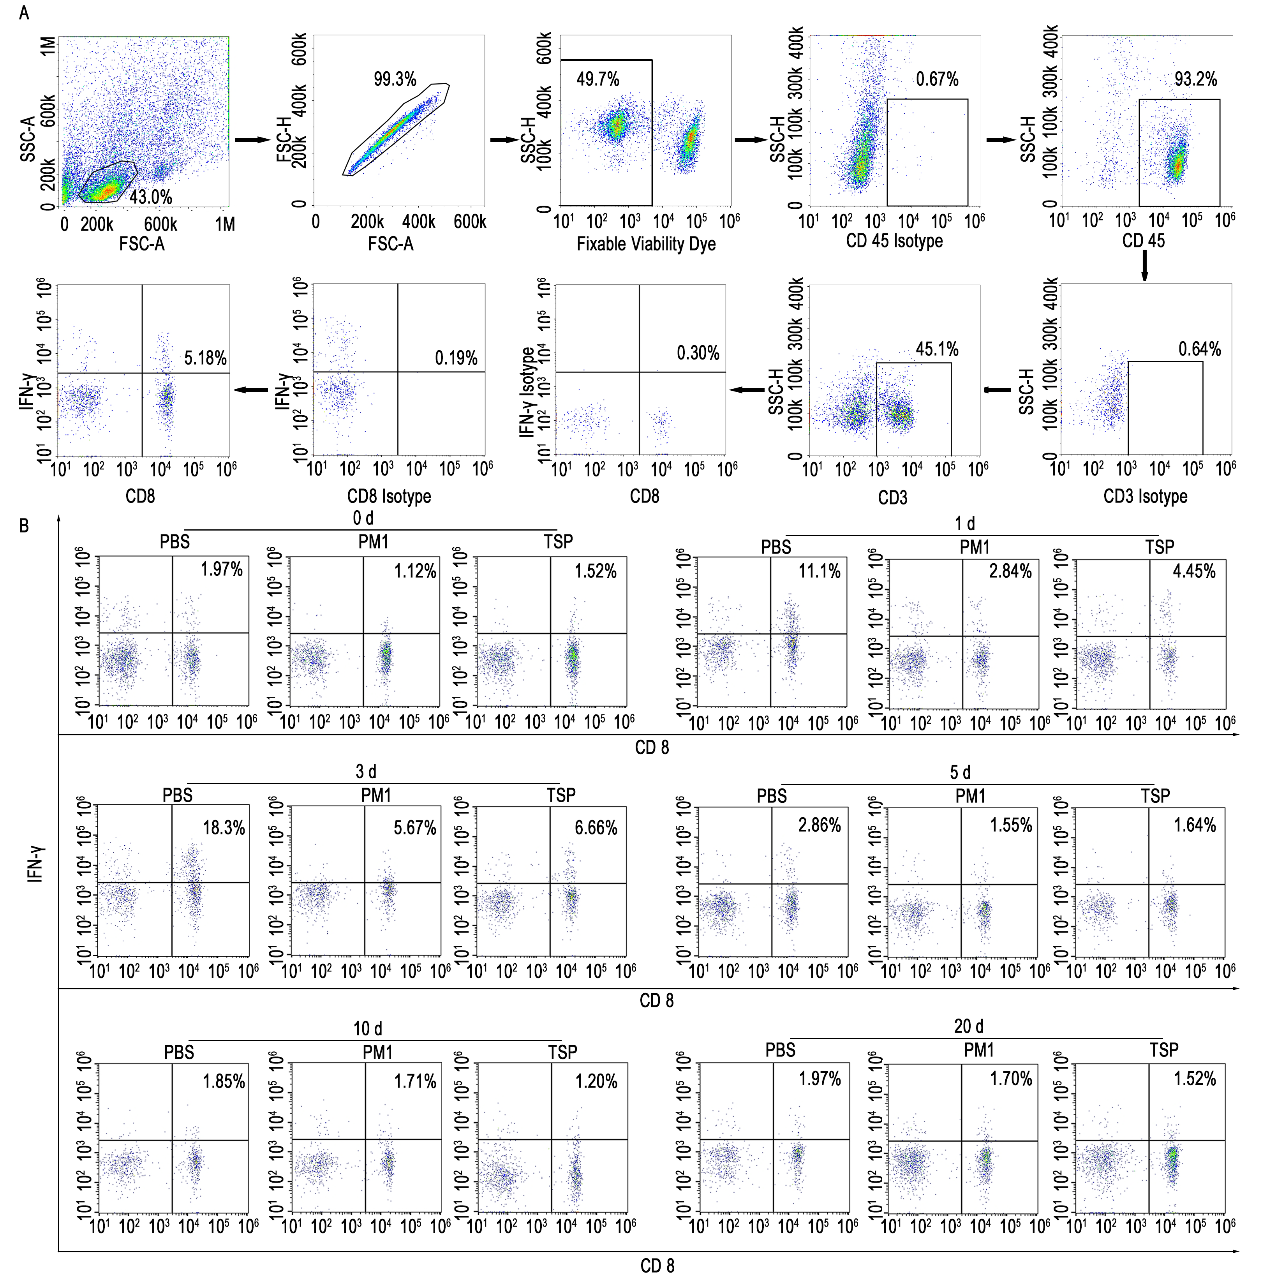** |
| --- |
| **Figure 1—figure supplement 5. A.** Gating strategy for the quantification of cytotoxic T lymphocytes CTLs cells (IFN-γ+CD8+/CD45+CD3+) in the lung tissues. **B.** Representative flow cytometry analysis of CTLs in FPM-exposed lung tissue of mice under the physical conditions (0 d) or at indicated days (0d, 1 d, 3d, 5 d, 10 d and 20 d) after intravenous injection with LLC. |

| **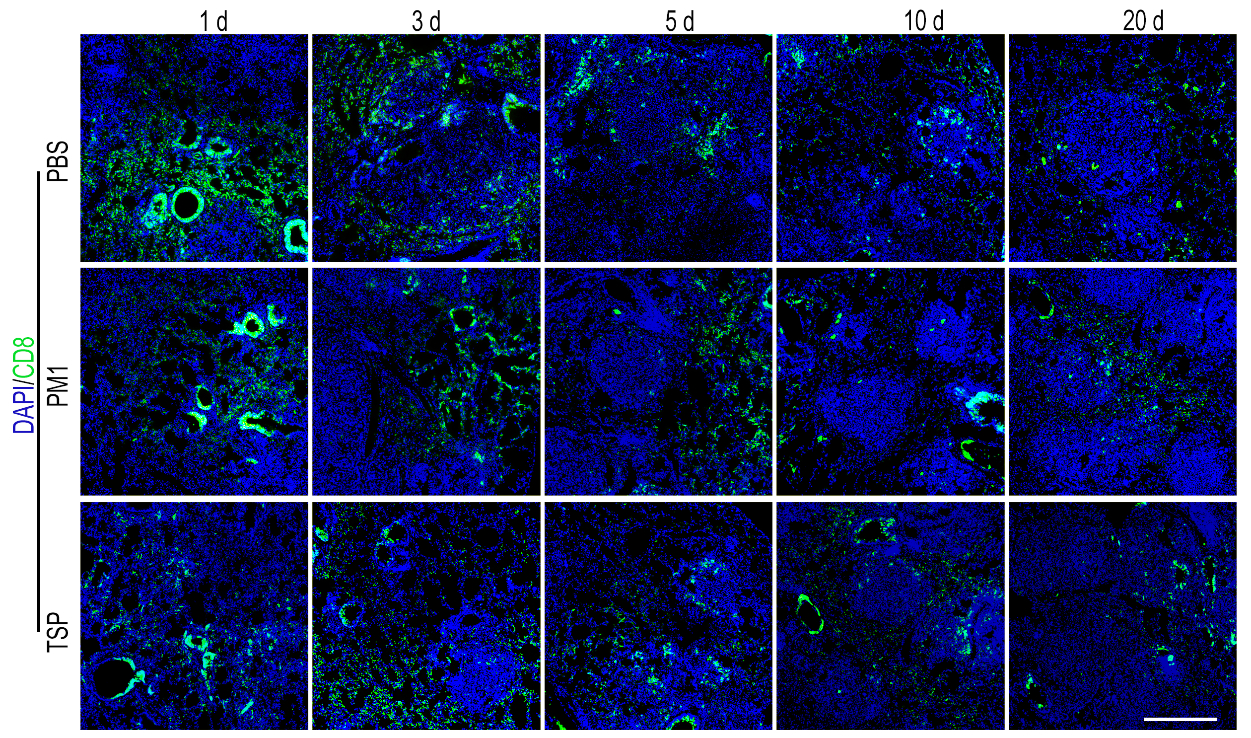** |
| --- |
| **Figure 1—figure supplement 6.** A. Representative immunofluorescence images of CTLs’ infiltration into the FPM-exposed lung tissue at indicated days (1 d, 3 d, 5 d, 10 d and 20 d) after intravenous injection with LLC. The CTLs were labelled with CD8 and shown in green. Images are representative for three independent experiments. Scale bar = 200 μm. |

| **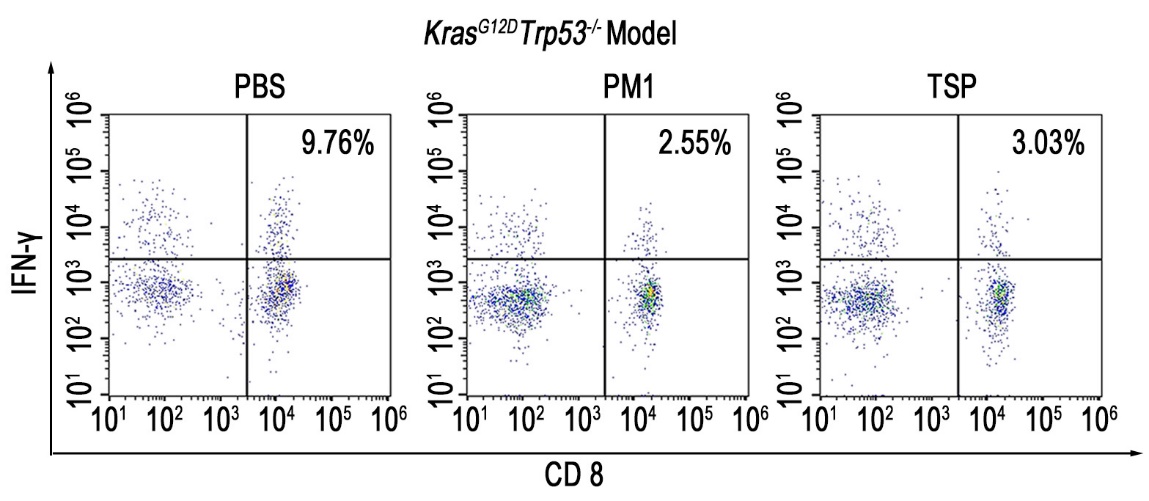** |
| --- |
| **Figure 1—figure supplement 7.** Representative flow cytometry analysis of CTLs (IFN-γ+CD8+/CD45+CD3+) in FPM-exposed lung tissue of *KrasG12DTrp53-/-* mice 4 weeks after tumor initiation with the intratracheal injection of AdCre. |

| **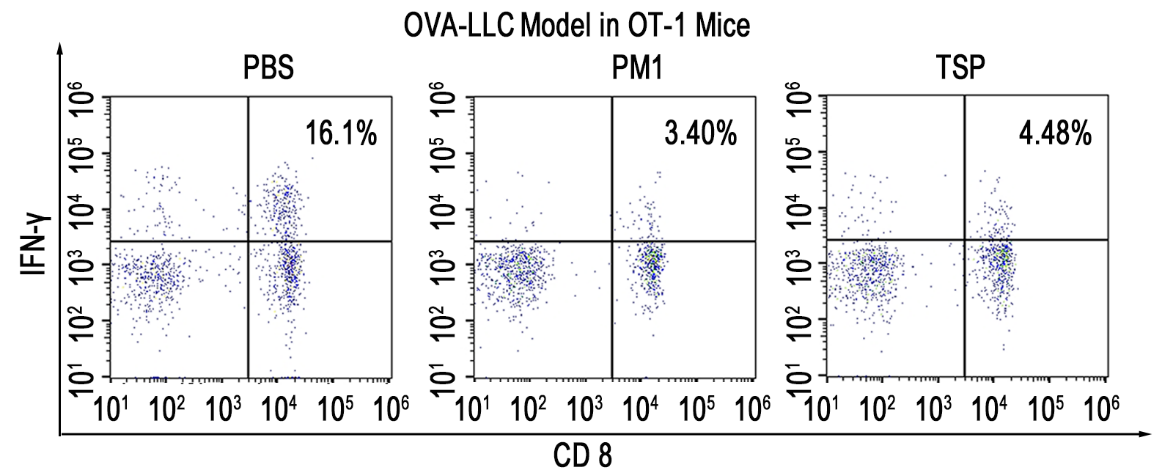** |
| --- |
| **Figure 1—figure supplement 8.** Representative flow cytometry analysis of CTLs (IFN-γ+CD8+/CD45+CD3+) in FPM-exposed lung tissue of OT-1 TCR transgenic mice 1 day after OVA-LLC stimulation. |

| **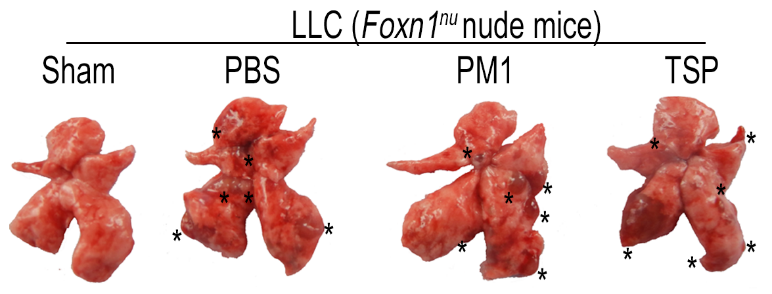** |
| --- |
| **Figure 1—figure supplement 9.** Gross lung tissue images in FPM-exposed *Foxn1nu* nude mice 20 days after they were intravenously injected with LLC.   | **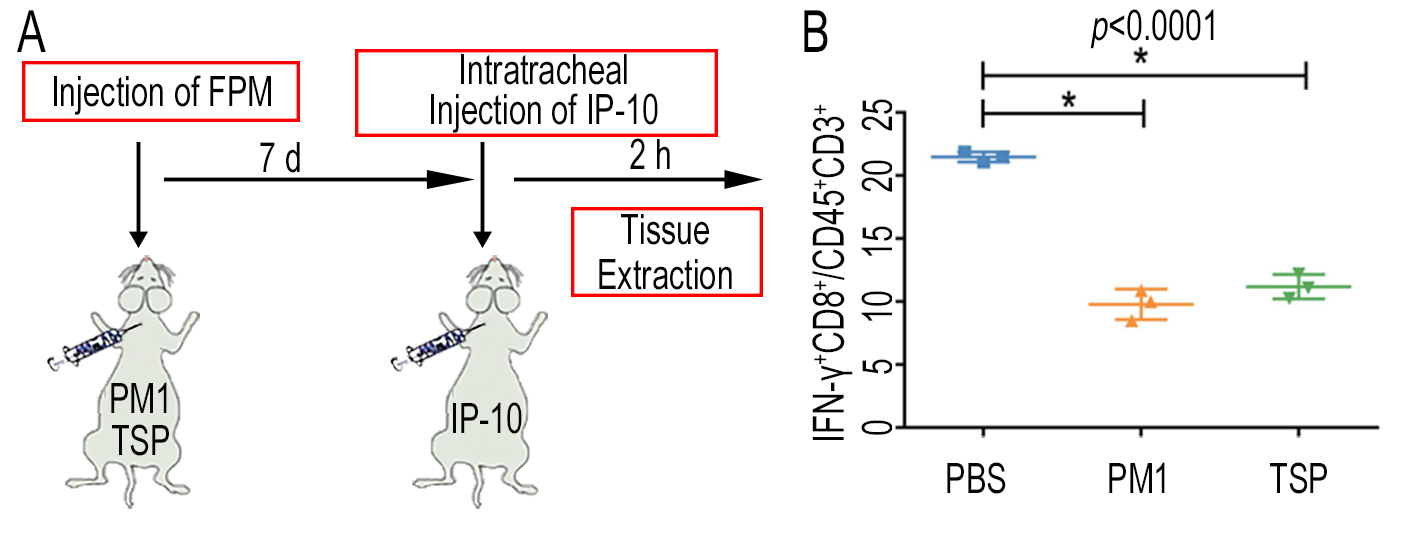** | | --- | | **Figure 1—figure supplement 10.** A. Scheme of analyzing the effect of T cell chemokines IP-10 on the CTLs’ infiltration into the FPM-exposed mice; B. Statistical flow cytometry analysis of CTLs cells (IFN-γ+CD8+/CD45+CD3+) in lung tissue 2 hours after the mice were stimulated with 5 μg/kg IP-10 through intratracheal injection. n=3. Results are shown as mean ± SD. **p*<0.05 after ANOVA with Dunnett’s tests. | |

1. **Effect of FPM on CTLs’ Migration Potential.**

| **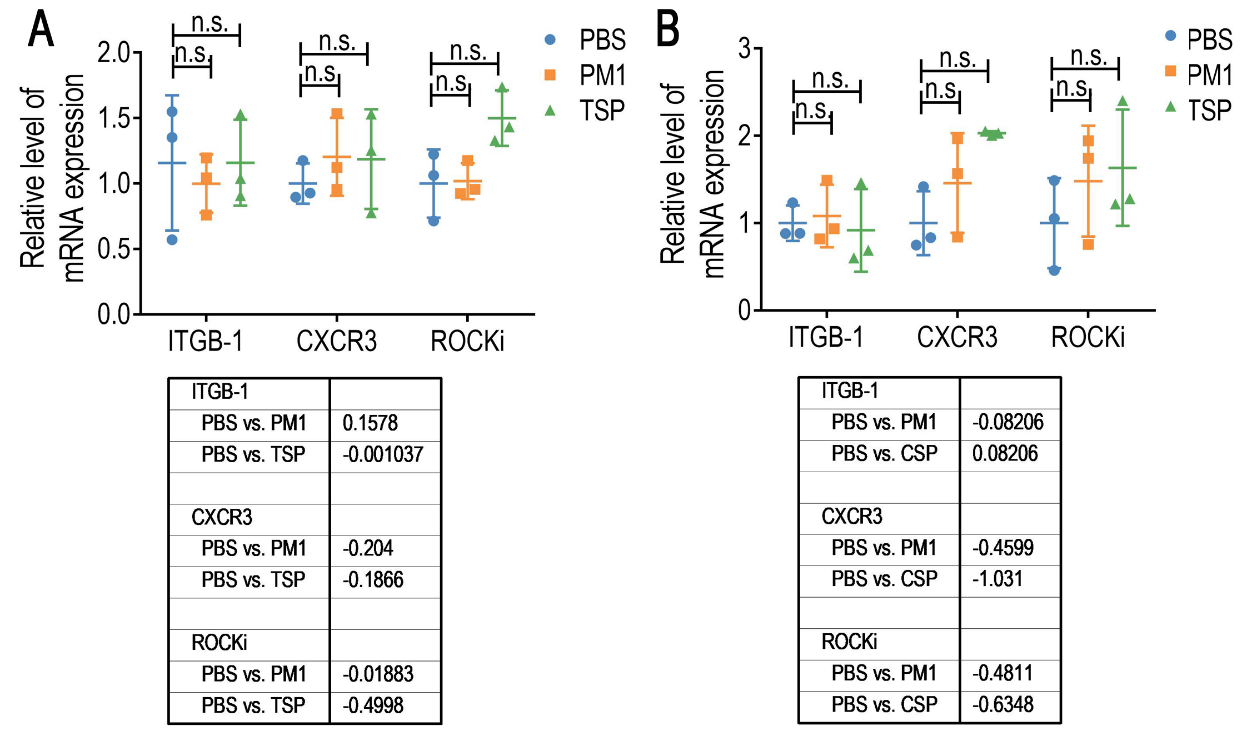** |
| --- |
| **Figure 2—figure supplement 1.** Transcriptional level of typical markers related to CTLs’ migration, integrin-1 (ITGB-1), C-X-C motif chemokine receptor 3 (CXCR 3) and Rho-associated kinase (ROCKi), in Jurkat T cells after they were stimulated with FPM for 48 h (A) or in the CTLs separated from lung tissue exposed to FPM for 7 days (B). n=3. Results are shown as mean ± SD. n.s. indicates no statistical significance. *p* values were listed underneath. |

1. **Effect of FPM on Lung Structure.**

| **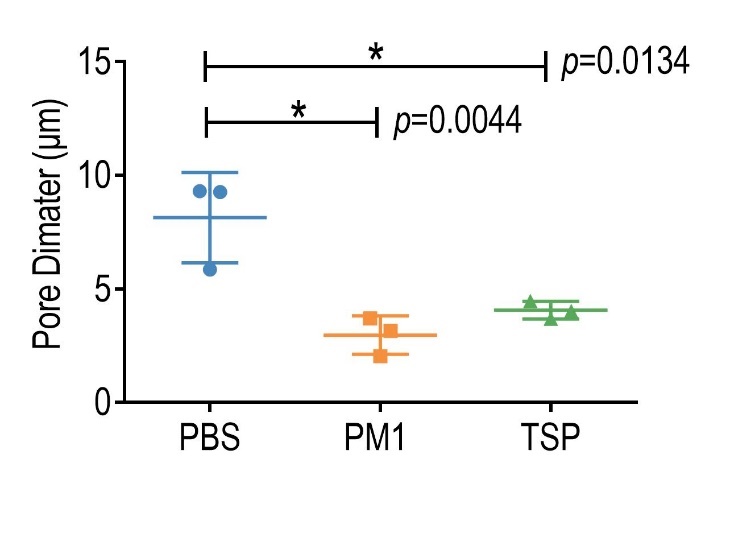** |
| --- |
| **Figure 2—figure supplement 2.** The quantified analysis of pore diameter of interstitial matrix in the lung tissue, based on the scanning electron microscope (SEM) images and analyzed by Image J. n=3. Results are shown as mean ± SD. **p*<0.05 after ANOVA with Dunnett’s tests.   | 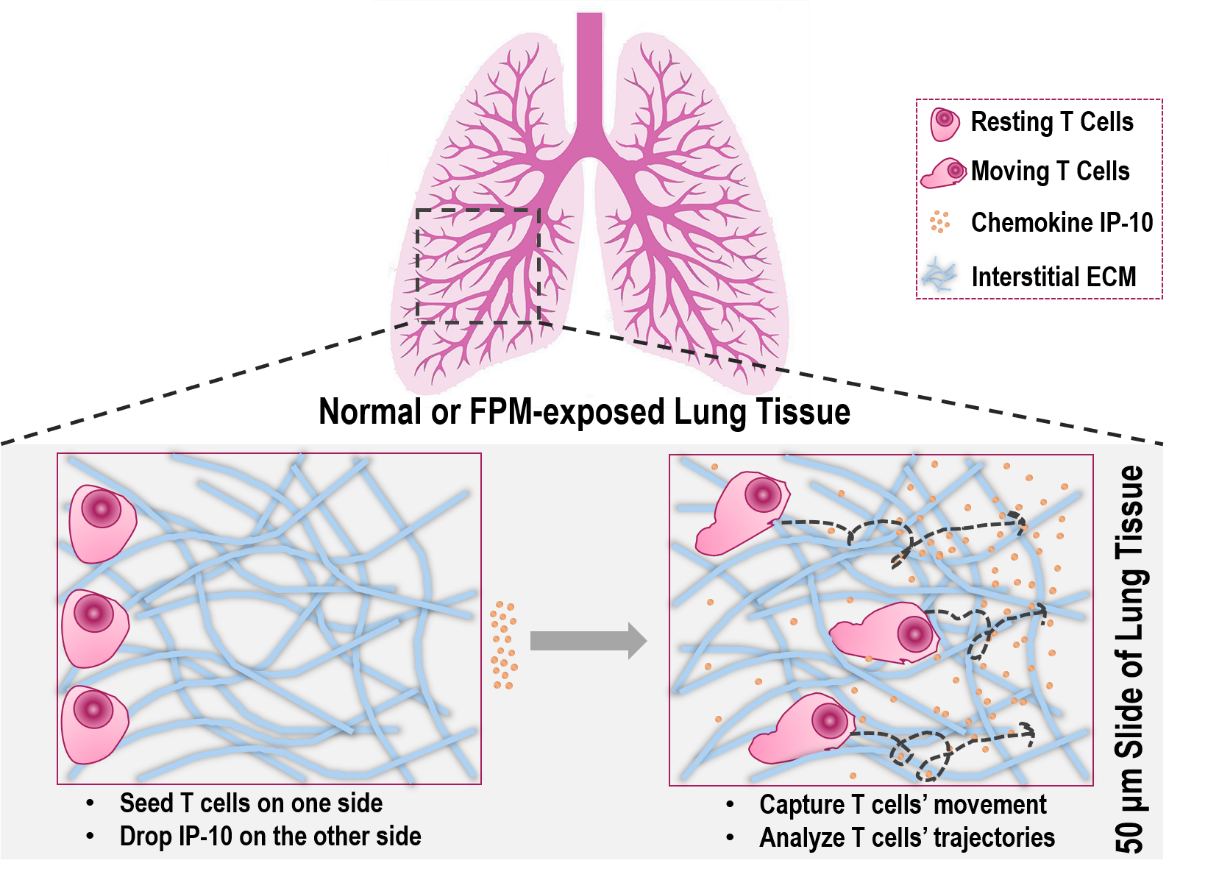 | | --- | | **Figure 2—figure supplement 3.** Schematic diagram of analyzing of CTLs’ migration in lung tissue slice of FPM-exposed mice or PBS group. | |

**Figure 2—video 1-3.** Dynamic migration videos of T cells in the slice of lung tissue exposed to FPM. Jurkat T cells were pre-stained with Calcein-AM and labelled as green in videos.

| 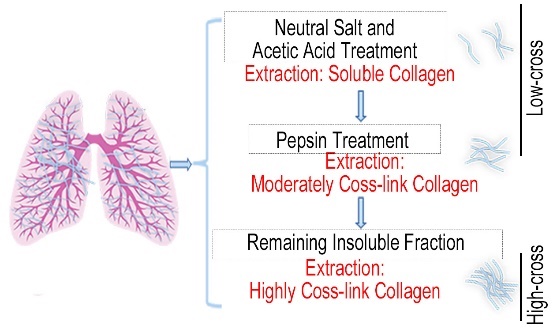 |
| --- |
| **Figure 2—figure supplement 4**. Schematic diagram of separating collagen fraction with different crosslink level. The part separated by neutral salt, acetic acid and pepsin was defined as ‘low-cross’ and the residual ones was regarded as ‘high-cross’, according to the reported literature (1). |

**
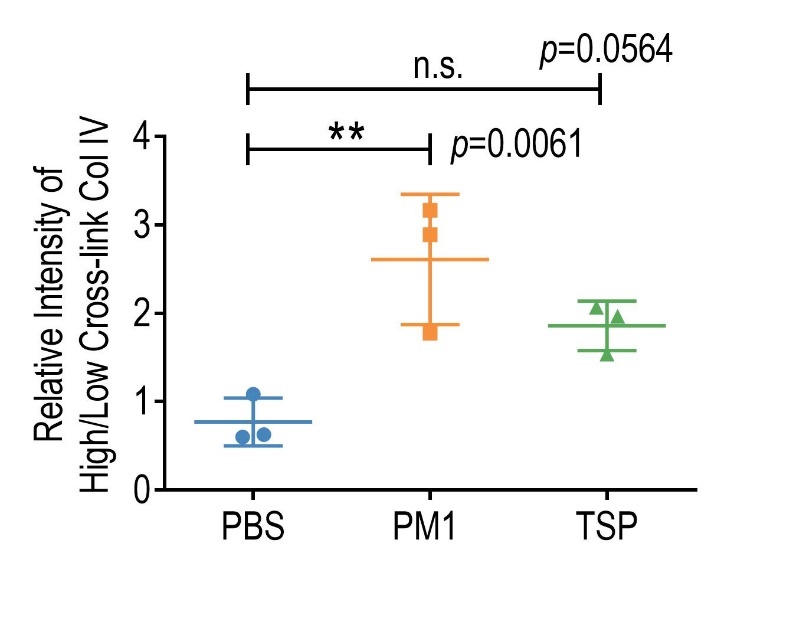
**

| **Figure 2—figure supplement 5.** The relative intensity of high-crosslink Col IV to low-crosslink ones according to the WB results of lung tissue exposed to FPM for 7 days, based on the Image J analysis. n=3. Results are shown as mean ± SD. **p*<0.05 after ANOVA with Dunnett’s tests. n.s. indicates no statistical significance. |
| --- |
| | **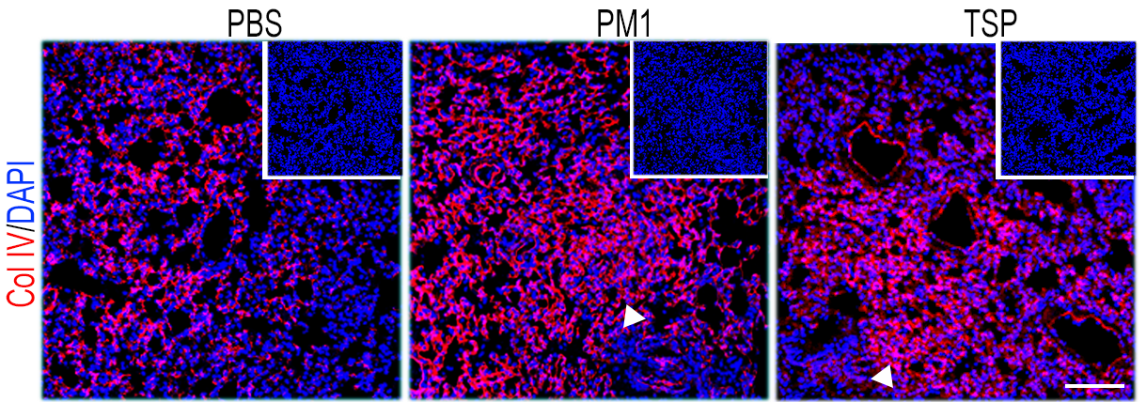** | | --- | | **Figure 2—figure supplement 6.** Representative Col IV immunofluorescence images of lung tissue in the mice exposed to FPM for 7 days, with the blue DAPI staining images shown in the inserted box. Scale bar = 100 μm. | |

| **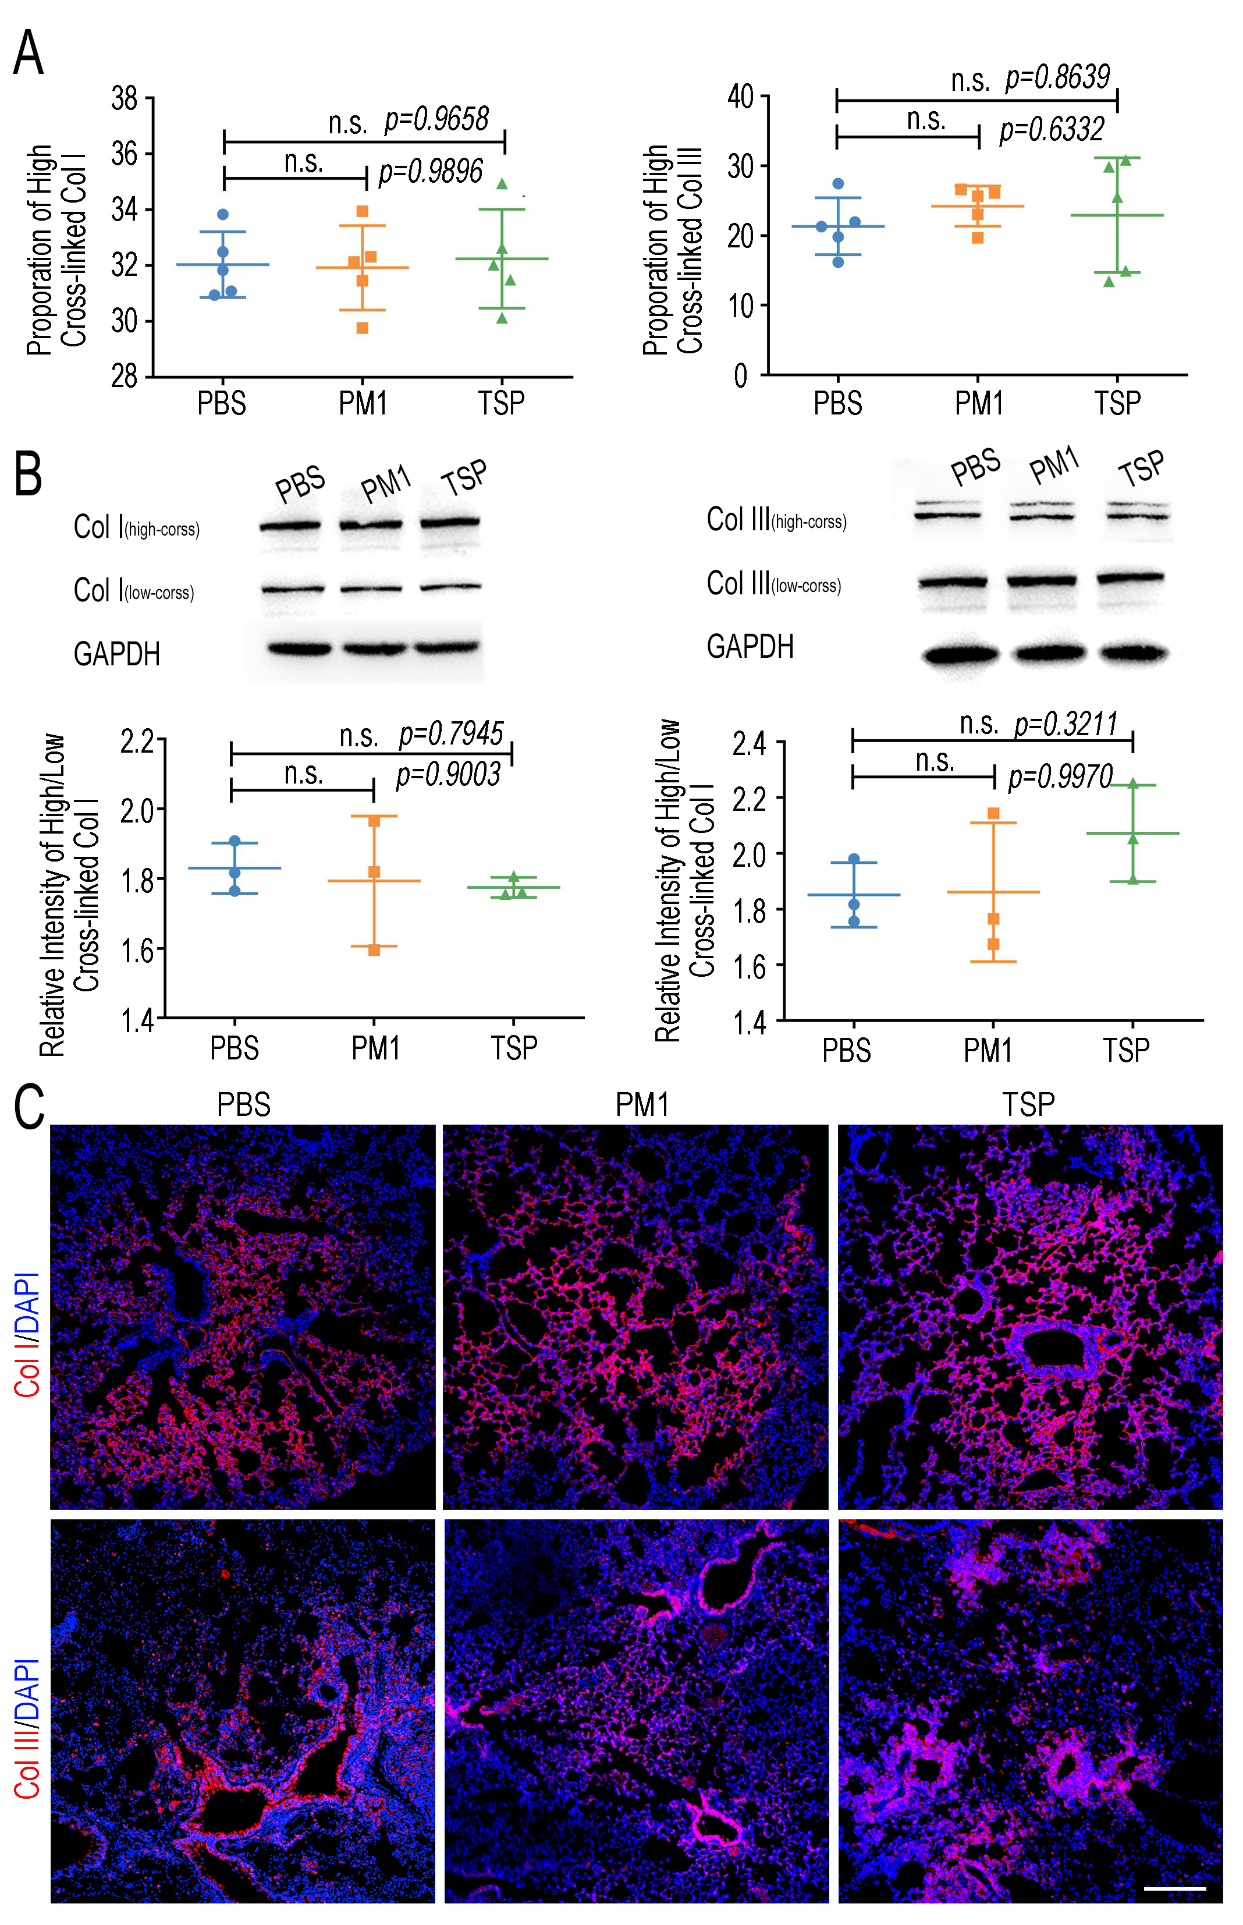** |
| --- |
| **Figure 2—figure supplement 7.** A. Proportion of high-crosslink Col I (left) and Col III (right) in lung tissue of mice exposed to FPM or PBS for 7 days, which was calculated by the ‘high-cross’ fragment divided by the sum of different fraction (‘low-cross’ ones and ‘high-cross’ ones). The content of each part was detected by enzyme linked immunosorbent assay (ELISA). n=5.; B. Western blotting analysis of ‘low-cross’ collagen and ‘high-cross’ Col I (left) and Col III (right) in lung tissue of mice exposed to FPM or PBS for 7 days. Their relative intensity analyzed by Image J was shown underneath. n=3; C. Representative Col I and Col III immunofluorescence images of lung tissue in the mice exposed to FPM for 7 days. Scale bar = 100 μm. Results are shown as mean ± SD. n.s. indicates no statistical significance. |

| **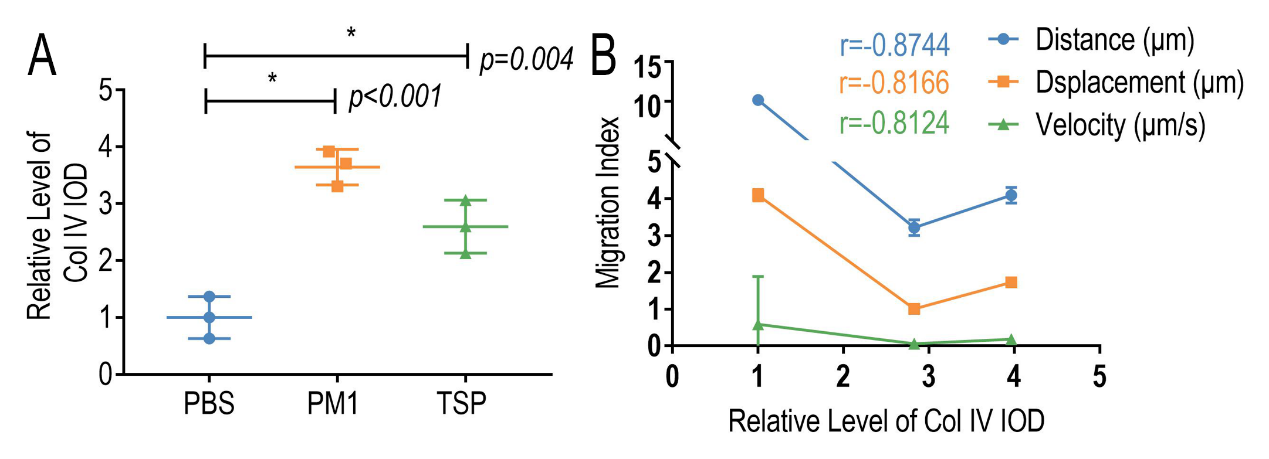** |
| --- |
| **Figure 2—figure supplement 8. A.** The integrated optical density (IOD) of Col IV immunofluorescence images of lung tissue exposed to FPM for 7 days, based on Image J analysis. n=3. Results are shown as mean ± SD. *p<0.05 after ANOVA with Dunnett’s tests. **B.** Pearson’s correlation line of the migration index (migration distance, displacement and velocity) of different groups with integrated optical density (IOD) of Col IV in corresponding lung tissue slice as panel A. n=3. Results are shown as mean ± SD. *p<0.05 after ANOVA with Dunnett’s tests. |

| **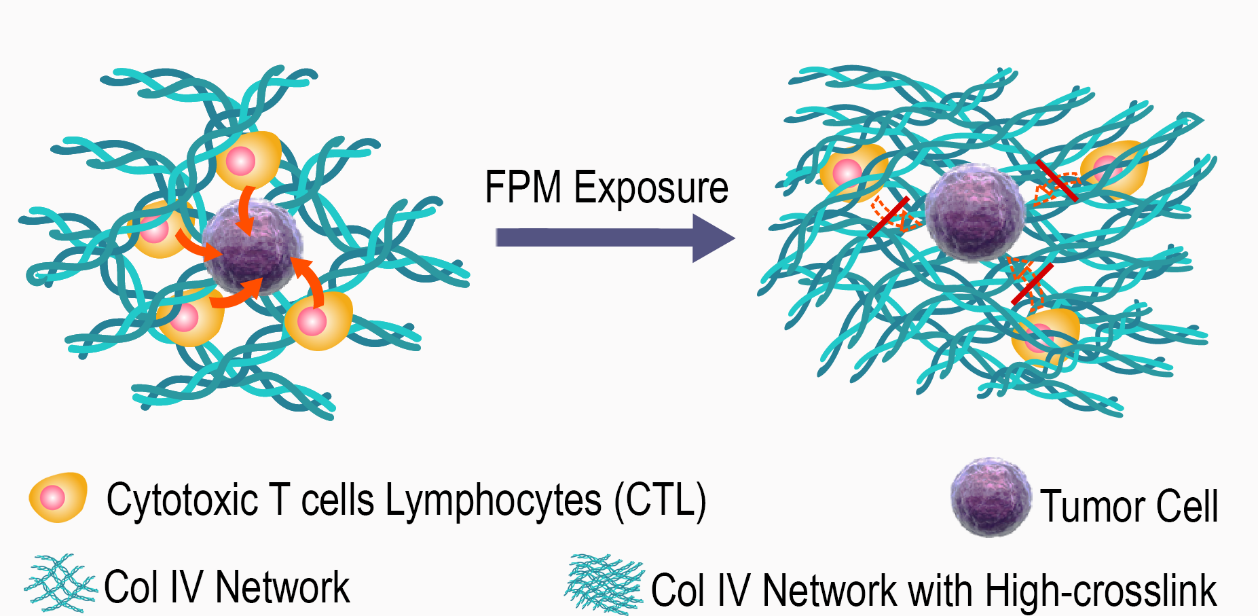** |
| --- |
| **Figure 2—figure supplement 9.** Schematic diagram about CTLs’ migration on the lung tissue exposed to FPM. |

**Figure 2—video 4-7.** Dynamic migration videos of T cells on FPM-exposed lung tissue pre-treated with collagenase D (0.05 mg/mL) for 5 min. Jurkat T cells were pre-stained with Calcein-AM and labelled as green in videos. Collagen IV in lung tissue were labelled as red.

1. **The Effect of FPM on Col IV Crosslink.**

| **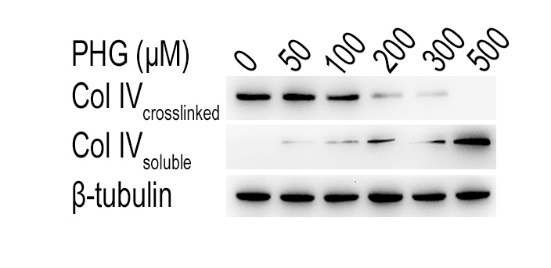** |
| --- |
| **Figure 3—figure supplement 1.** Western blotting analysis of ‘soluble’ and ‘crosslinked’ Col IV fraction in M2-10B4 cells lysate after the cells were treated with different concentration of crosslink inhibitor phloroglucinol (PHG) for 7 days.   | 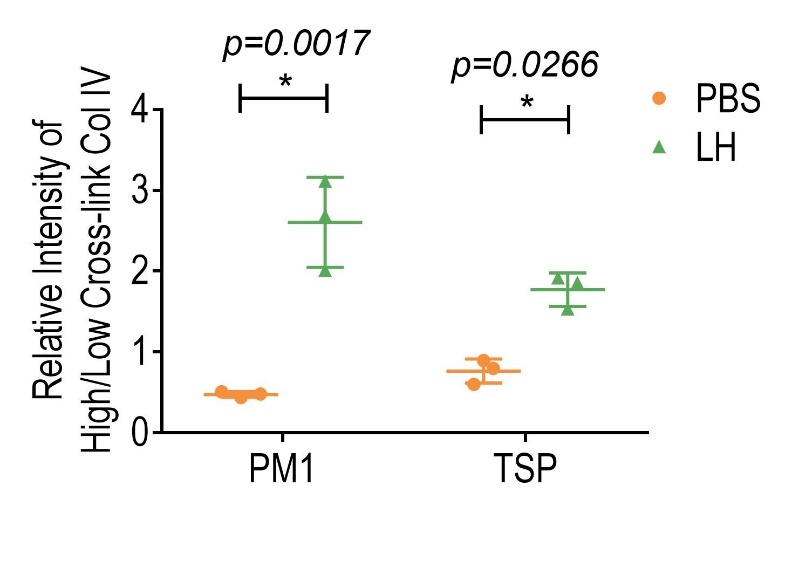 | | --- | | **Figure 3—figure supplement 2.** The relative intensity of high-crosslink Col IV to low-crosslink ones according to the WB results in M2-10B4 cells lysate enriched with soluble collagen after their treatment with FPM or the mixture of lung homogenate (LH) and FPM, that is, LH-FPM. n=3. Results are shown as mean ± SD. **p*<0.05 after ANOVA with Dunnett’s tests. | |

1. **Detection of Tryptic Peptides Containing Crosslink Site.**

| **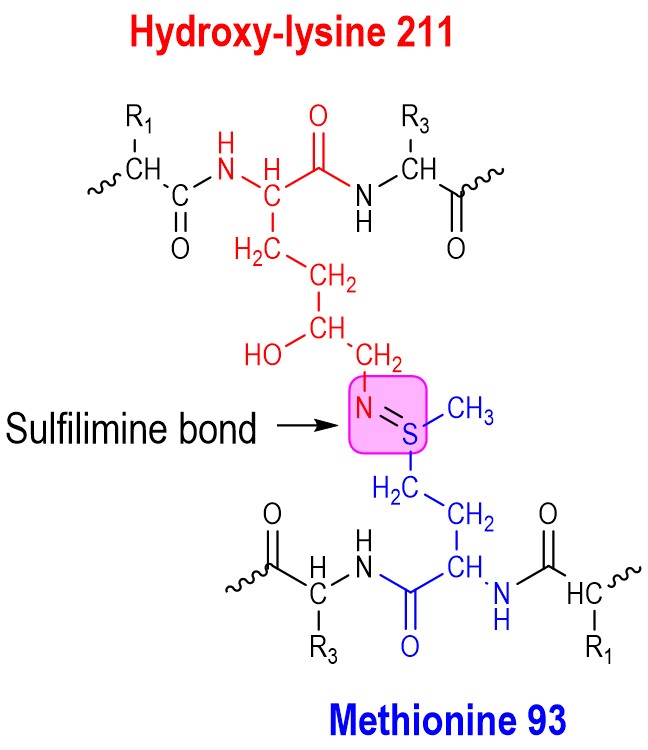** |
| --- |
| **Figure 3—figure supplement 3.** Structure of sulfilimine bond formed at the covalent crosslinks of NC1 domains, shown in the lilac box. |

| **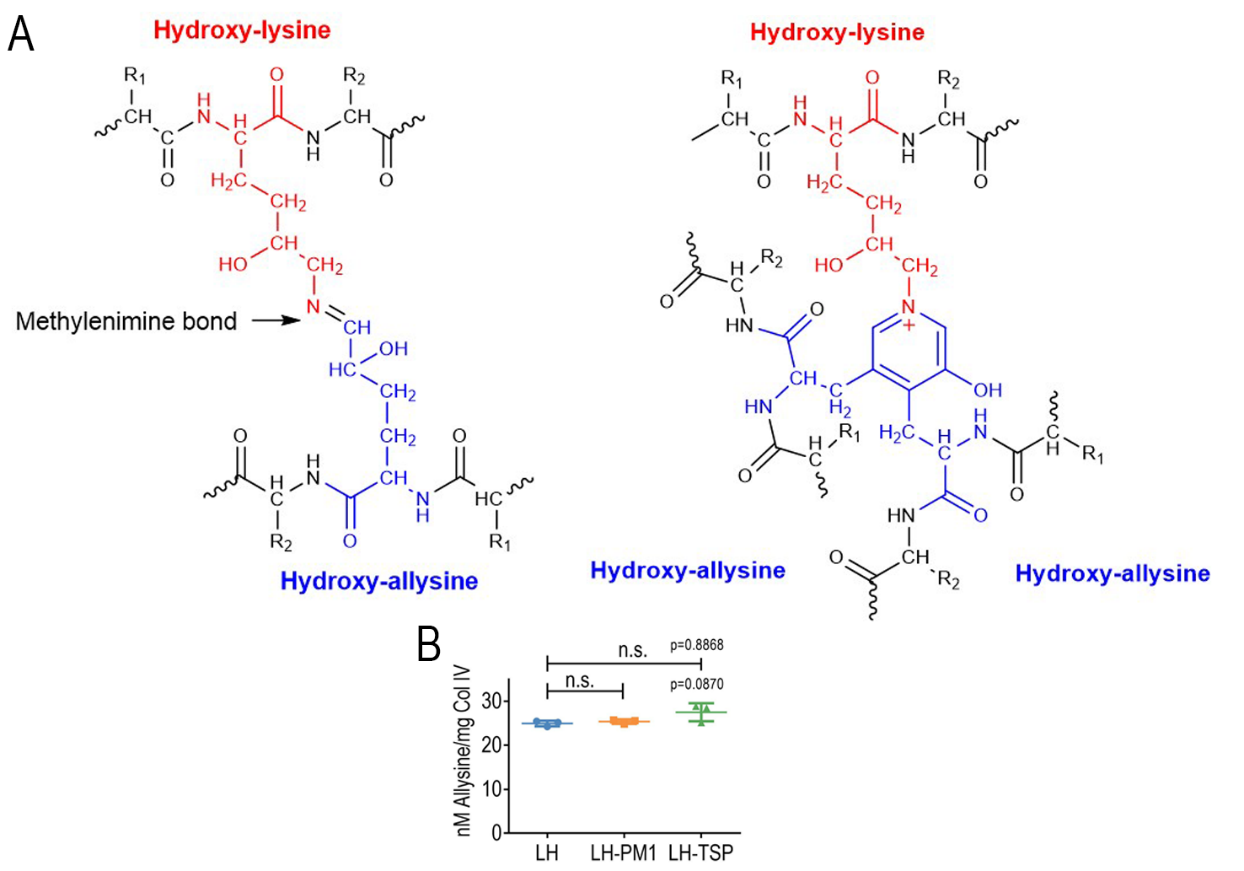** |
| --- |
| **Figure 3—figure supplement 4.** A. The potential crosslink site formed at 7S domain, containing methylenimine bond (-C=N-, left) or pyridinum crosslink (right), shown in the lilac box; B. The allysine generated during the Col IV crosslinking after soluble Col IV were incubated with LH per se or the mixture of LH-FPM (LH-PM 1 and LH-TSP) for 30 min, detected with specific probes for allysine, with a serial content of oxidized bovine serum albumin containing known aldehydes as the internal standard (2). n=3. Results are shown as mean ± SD. n.s. indicates no statistical significance. |
|  |

1. **Preparation and Characterization of Protein Corona.**

| **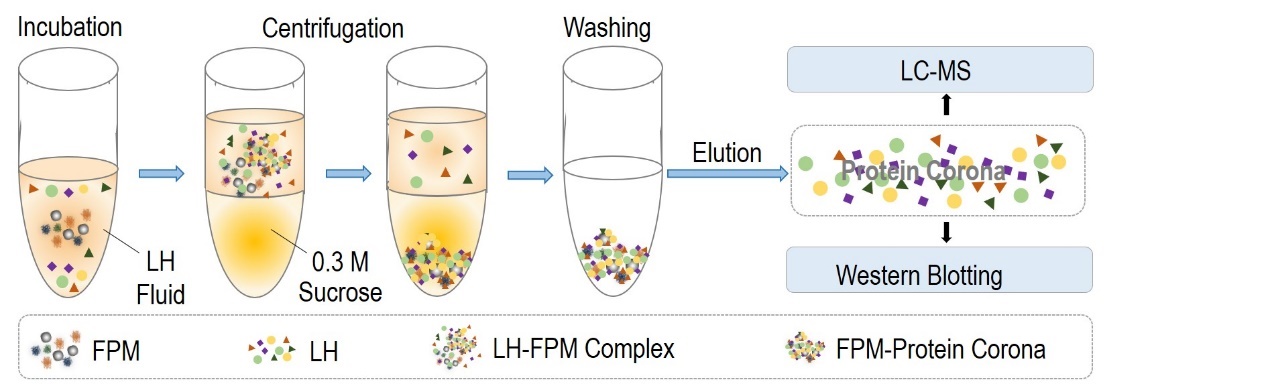** |
| --- |
| **Figure 4—figure supplement 1.** Schematic diagram of separation and preparation of FPM’ protein corona in lung homogenate (LH). |

1. **Effect of FPM on PXDN’s Enzymatic Activity and Phase Separation.**

| **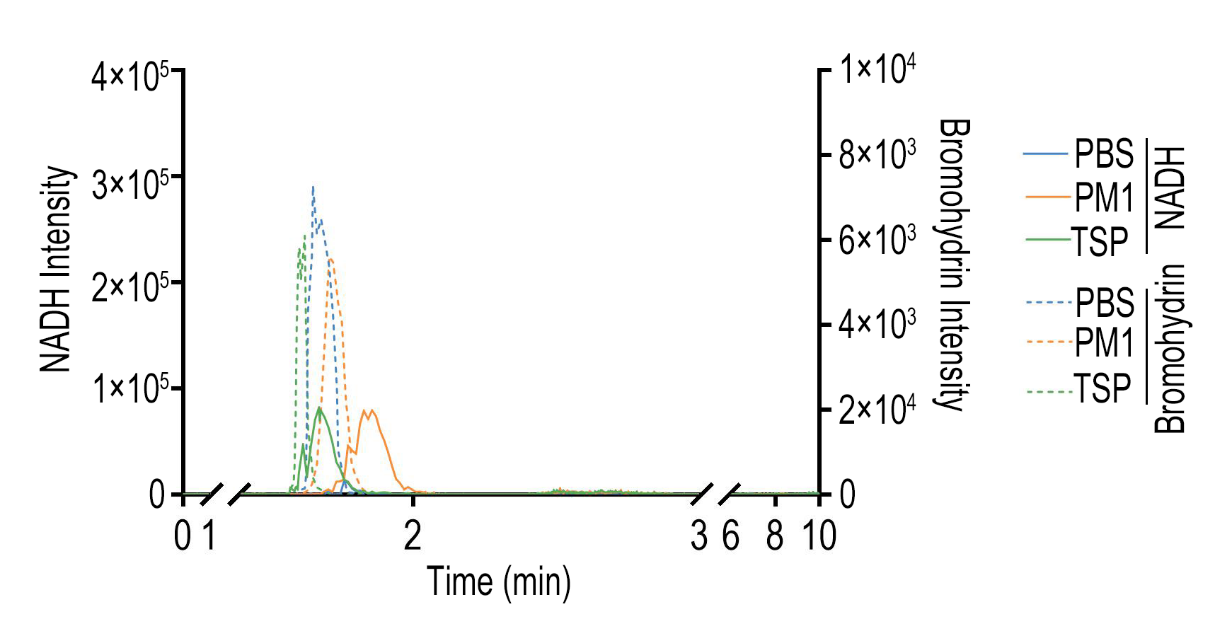** |
| --- |
| **Figure 4—figure supplement 2.** Liquid chromatography-mass spectrometry (LC-MS) spectrum for NADH (dotted line) and the bromohydrin (line), according to the reported literature (3). The analysis was performed after the enzyme PXDN was incubated with FPM for 30 min and then catalyzed in the presence of 100 μM H2O2 and 200 μM NaBr at 37°C for 30 min. |
| | 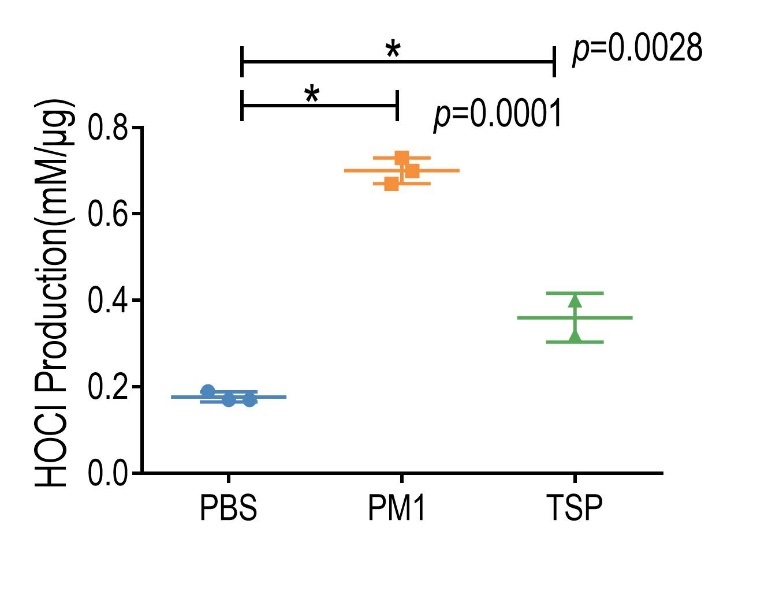 | | --- | | **Figure 4—figure supplement 3.** HOCl production induced by PXDN measured with HClO detecting fluorescent probes, after the enzyme was incubated with FPM for 30 min and then catalyzed in the presence of 100 mM H2O2 and 200 mM NaCl, with a serial concentration of HClO as internal control. n=3. Results are shown as mean ± SD. **p*<0.05 after ANOVA with Dunnett’s tests. | | |
|  | |
| **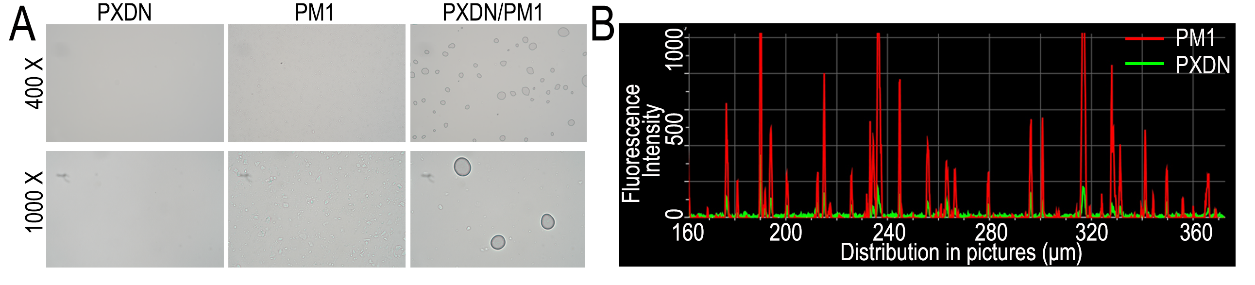** | |
| **Figure 4—figure supplement 4. Effect of FPM on PXDN’s phase separation.** A. Phase contrast microscopy of PXDN *per se* or incubated with FPM for 30 min in LH; B. The fluorescence distribution profiles of the cross-sectional region of liquid-like droplets on the FPM after FITC-labelled PXDN was incubated with rhodamine-labelled FPM in LH for 30 min. | |
| **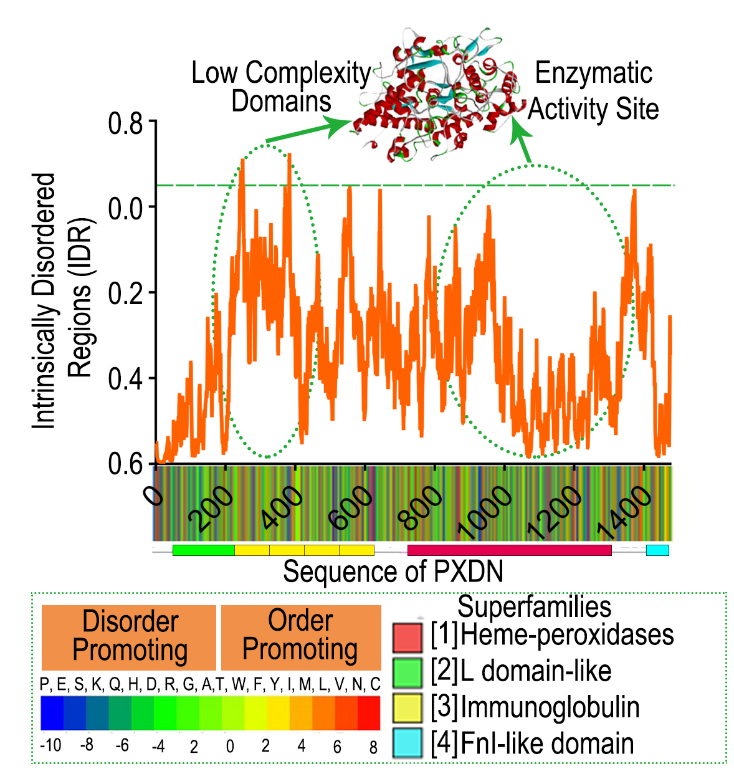** | |
| **Figure 4—figure supplement 5.** Intrinsically disordered regions (IDRs) analysis of PXDN domains by the IUPred algorithm. The low complexity domains and enzymatic activity site were respectively labelled with dotted green circles. PXDN’s template crystal structures were shown on the upper. Besides, bioinformatics analysis of the amino acid sequence of full-length PXDN shown underneath. The kinds of amino acids with order or disorder potential were listed with different color and the superfamily of PXDN was shown on the lower right (4). | |

1. **Effect of PXDN Inhibitor on Lung Tissue Microenvironment and Lung Tumorigenesis.**

**10.1 Effect of PXDN Inhibitor on Lung Tissue Structure.**

| **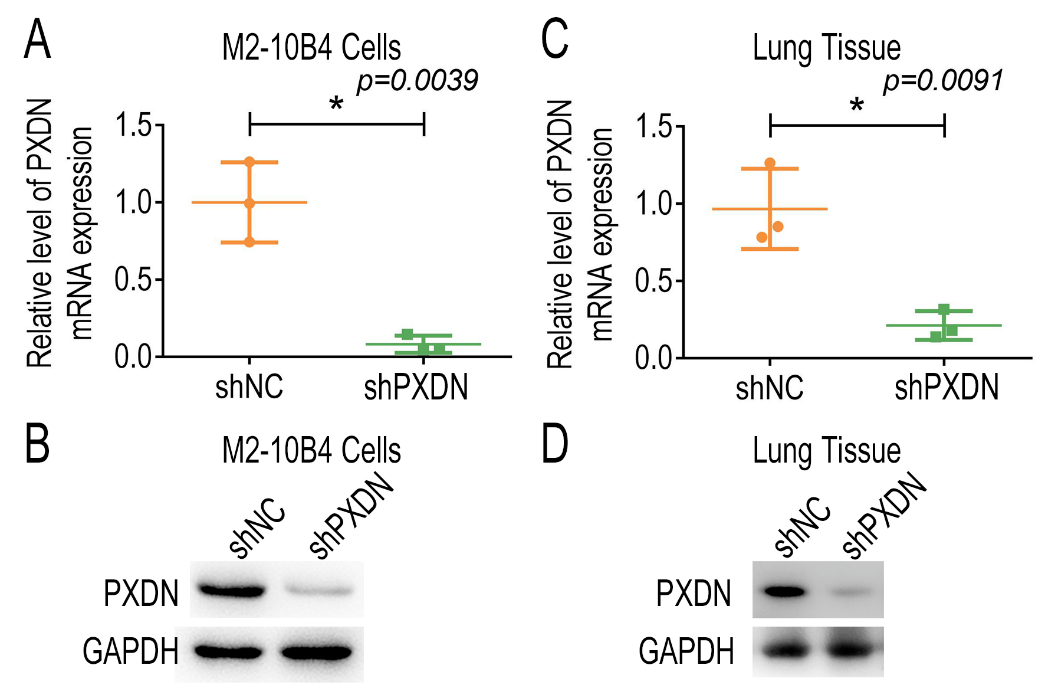** |
| --- |
| **Figure 5—figure supplement 1. A and B.** The transcriptional level analysis (**A**) and Western blotting analysis (**B**) of PXDN in M2-10B4 cells after they were transfected with plasmids capable of ectopically expressing PXDN specific short hairpin RNA (PXDN shRNA, shPXDN) or control shRNA (shNC) for 48 h; **C and D.** The transcriptional level analysis (**C**) and Western blotting analysis (**D**) of PXDN in lung tissue after the mice were administrated with 4 μg plasmids capable of ectopically expressing shPXDN mixed in the *in vivo*-jetPEI gene transfer regent through trachea injection every 3 day for 4 times. |
| **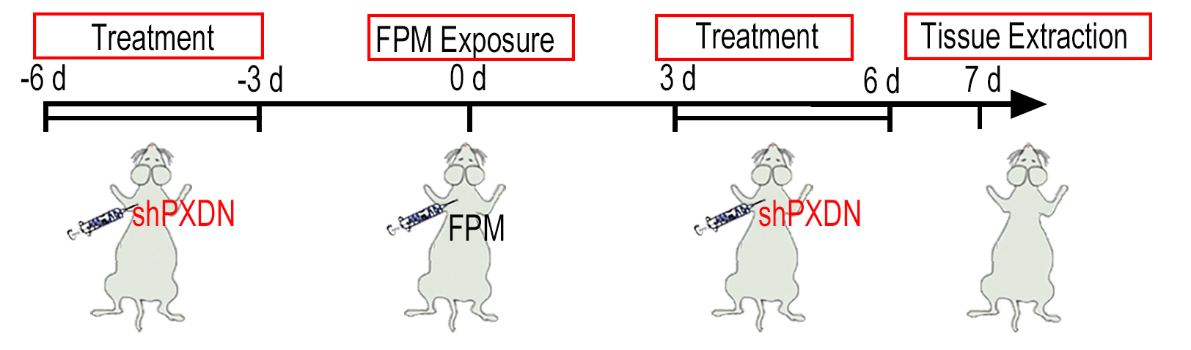** |
| **Figure 5—figure supplement 2.** Schematic diagram of analyzing the effect of PXDN specific short hairpin RNA interference (PXDN shRNA, shPXDN) on the structure of FPM-exposed lung tissue. |
| **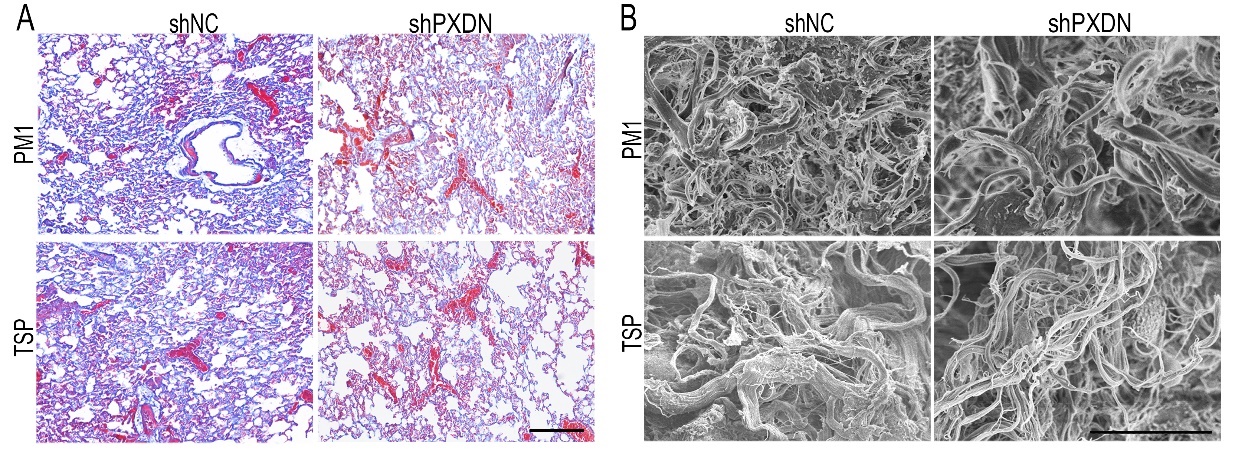** |
| **Figure 5—figure supplement 3. A.** Representative Massons’ trichrome histological analysis of lung tissue in FPM-exposed mice administrated with shPXDN (PXDN shRNA). Scale bar = 100 μm; **B.** Representative SEM images of interstitial matrix in the lung tissue in FPM-exposed mice administrated with shPXDN. Scale bar = 50 μm. |

**10.2 Effect of PXDN Inhibitor on T Cell Migration.**

| **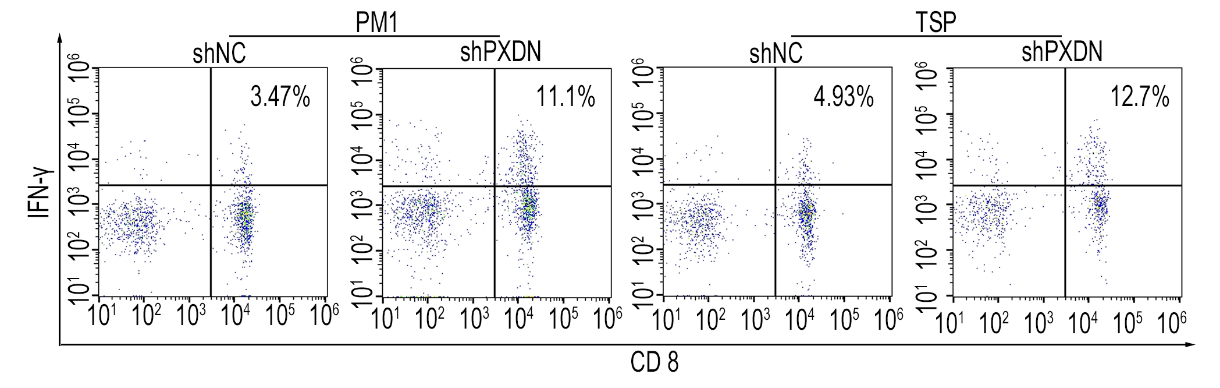** |
| --- |
| **Figure 5—figure supplement 4.** Representative flow cytometry analysis of CTLs’ infiltration (IFN-γ+CD8+/CD45+CD3+) into lung tissue of FPM-exposed group pretreated with shPXDN 1 day after they were stimulated with the LLC. |

**10.3 Effect of PXDN Inhibitor on Lung Tumorigenesis.**

| **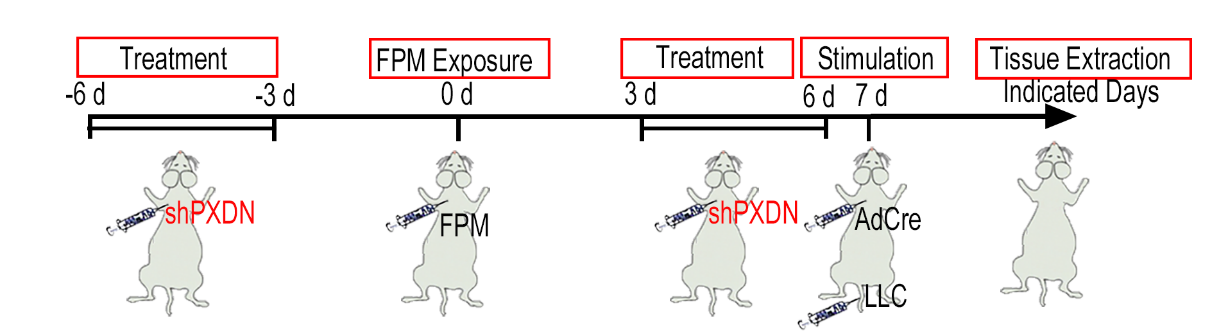** |
| --- |
| **Figure 5—figure supplement 5. A.** Schematic diagram of analyzing the therapeutic effect of shPXDN on LLC-stimulated or *KrasG12DTrp53-/-*-transgenic lung cancer model with FPM exposure. |

| **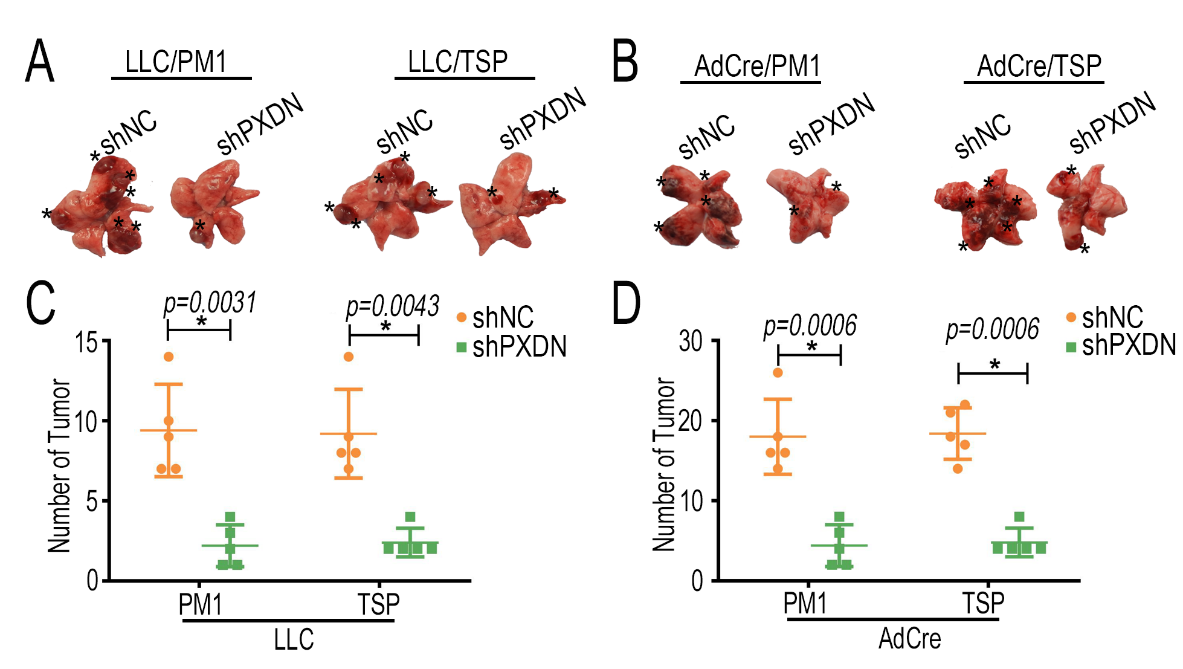** |
| --- |
| **Figure 5—figure supplement 6. A and B.** Gross lung tissue images in LLC-stimulated (**A**) or *KrasG12DTrp53-/-*-transgenic lung cancer model (**B**) administrated with shPXDN; **C and D.** Statistical analysis of tumor number in LLC-stimulated (**C**) or *KrasG12DTrp53-/-*-transgenic lung cancer model (**D**) administrated with shPXDN. n=5. Results are shown as mean ± SD. **p*<0.05 after ANOVA with Dunnett’s tests. |

| **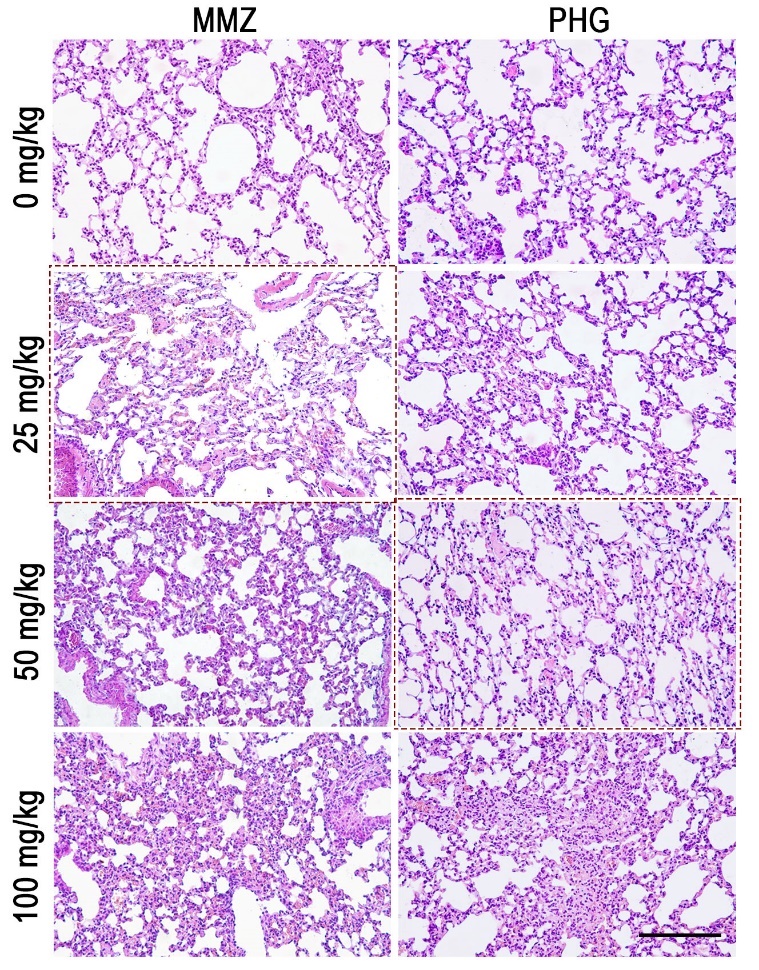** |
| --- |
| **Figure 5—figure supplement 7.** Representative H&E staining images of lung tissue with intratracheal injection with different concentration of methimazole (MMZ) and phloroglucinol (PHG) for 3 days. Scale bar = 100 μm. The concentration at the indicated group with red dotted lines was chosen as the subsequent administration dose. |
| **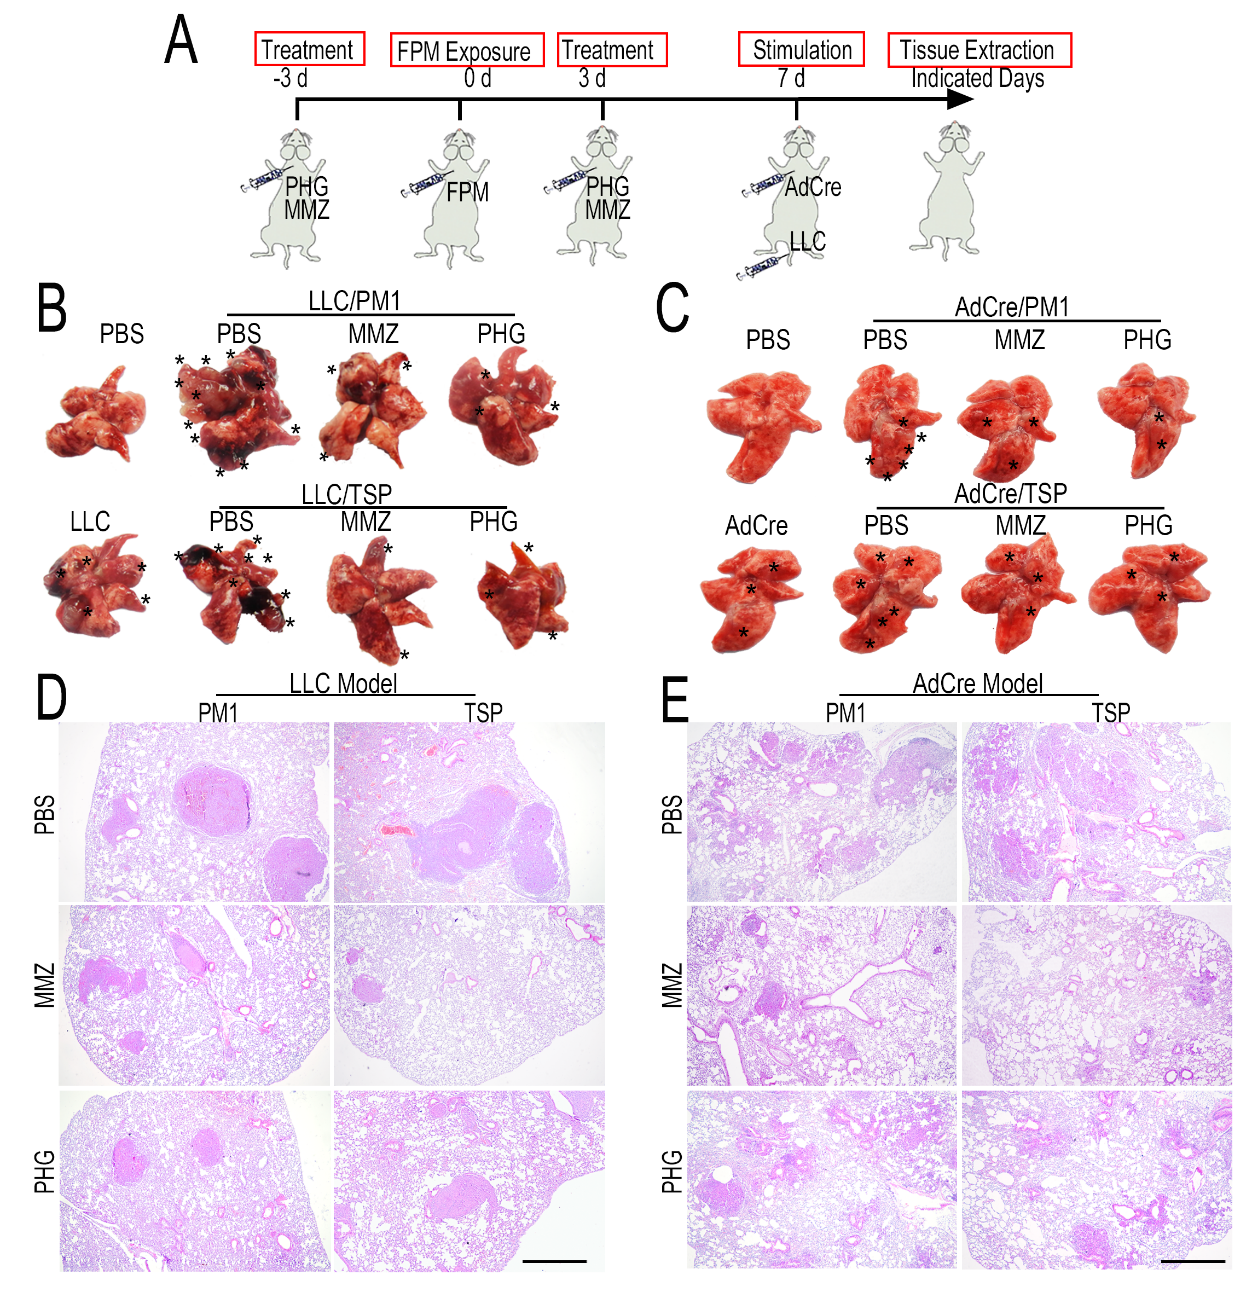** |
| **Figure 5—figure supplement 8. A.** Schematic diagram of analyzing the therapeutic effect of PXDN inhibition (MMZ or PHG) on LLC-stimulated or *KrasG12DTrp53-/-*-transgenic lung cancer model with FPM exposure; **B and C.** Gross images of lung tissue yielded from LLC-induced model (**B**) or *KrasG12DTrp53-/-*-transgenic lung cancer model (**C**) 20 days or 50 days after mice pretreated with MMZ or PHG were stimulated with LLC or AdCre; **D and E.** Representative H&E staining images of lung tissue yielded from LLC-induced model (**D**) or *KrasG12DTrp53-/-*-transgenic lung cancer model (**E**) as panel B and C. Images are representative for three independent experiments. |

1. **Supplementary Reference**

1. Popov, Y., Sverdlov, D.Y., Sharma, A.K., Bhaskar, K.R., Li, S., Freitag, T.L., Lee, J., Dieterich, W., Melino, G., and Schuppan, D. (2011) **Tissue transglutaminase does not affect fibrotic matrix stability or regression of liver fibrosis in mice** *Gastroenterology* **140**: 1642-1652.

2. Waghorn, P.A., Jones, C.M., Rotile, N.J., Koerner, S.K., Ferreira, D.S., Chen, H.H., Probst, C.K., Tager, A.M., and Caravan, P. (2017) **Molecular Magnetic Resonance Imaging of Lung Fibrogenesis with an Oxyamine-Based Probe** *Angewandte Chemie* **56**: 9825-9828.

3. Bathish, B., Turner, R., Paumann-Page, M., Kettle, A.J., and Winterbourn, C.C. (2018) **Characterisation of peroxidasin activity in isolated extracellular matrix and direct detection of hypobromous acid formation** *Arch Biochem Biophys* **646**: 120-127.

4. Bernardes, A., Textor, L.C., Santos, J.C., Cuadrado, N.H., Kostetsky, E.Y., Roig, M.G., Bavro, V.N., Muniz, J.R., Shnyrov, V.L., and Polikarpov, I. (2015) **Crystal structure analysis of peroxidase from the palm tree Chamaerops excelsa** *Biochimie* **111**: 58-69.
