# Supplementary figures and images for: Air pollution particles hijack peroxidasin to disrupt immunosurveillance and promote lung cancer
Source: eLife journal article supplement (doi:10.7554/elife.75345), 2022-04-07

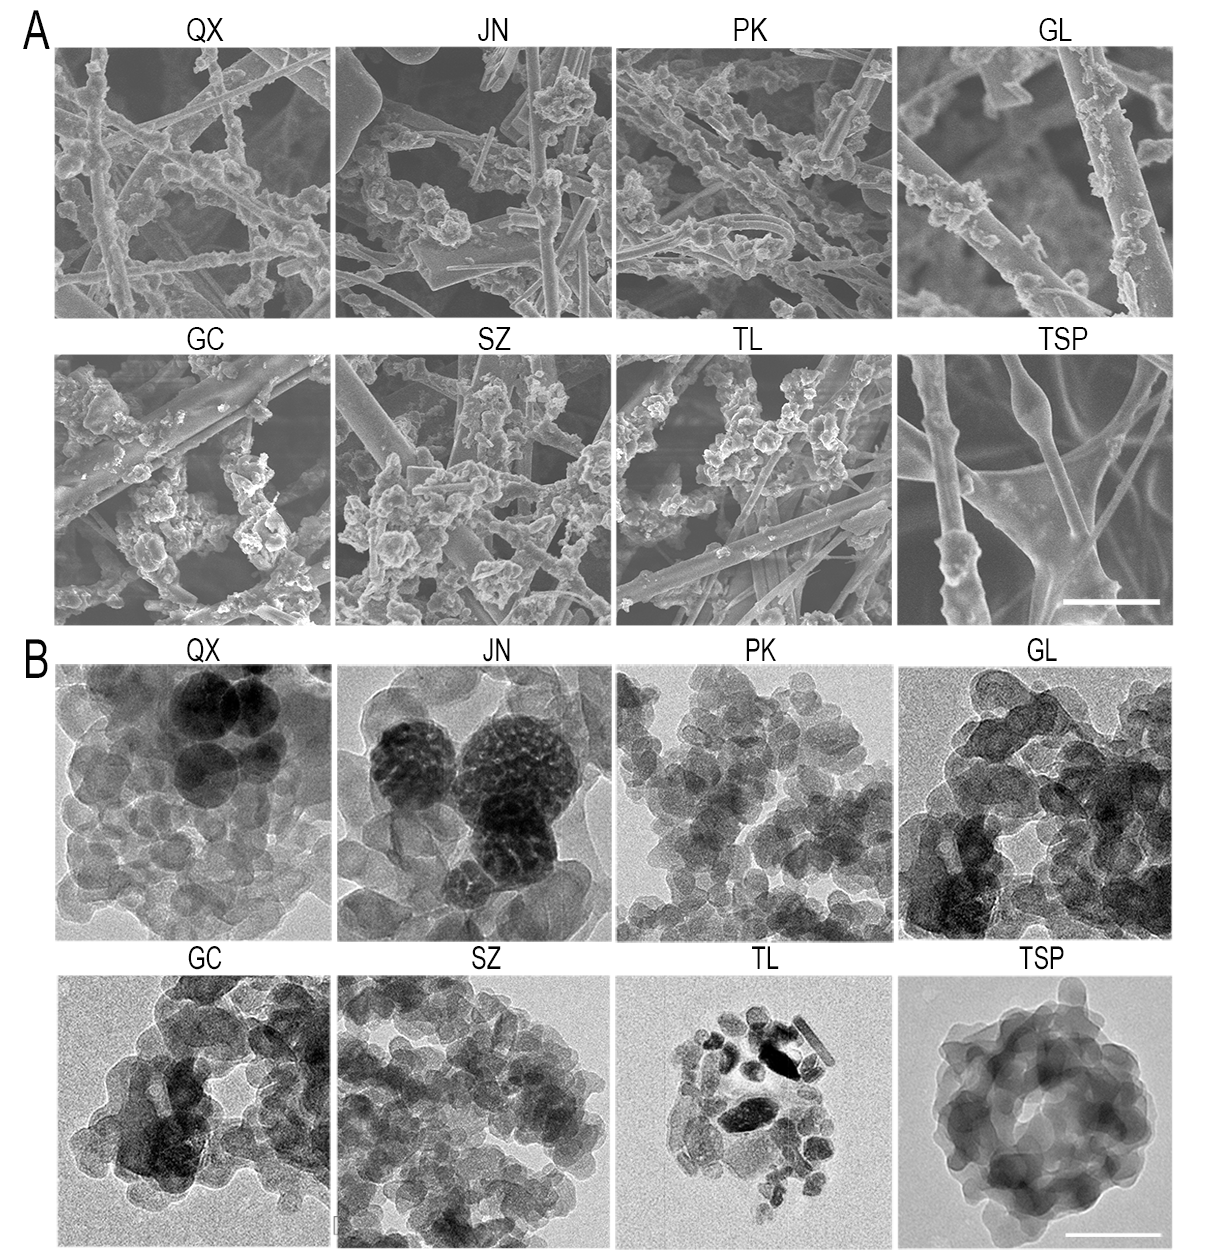

Supplement: supp [file elife-75345-supp-v1.zip › elife_poa_e75345_Figure_1_figure_supplement_1.tif]

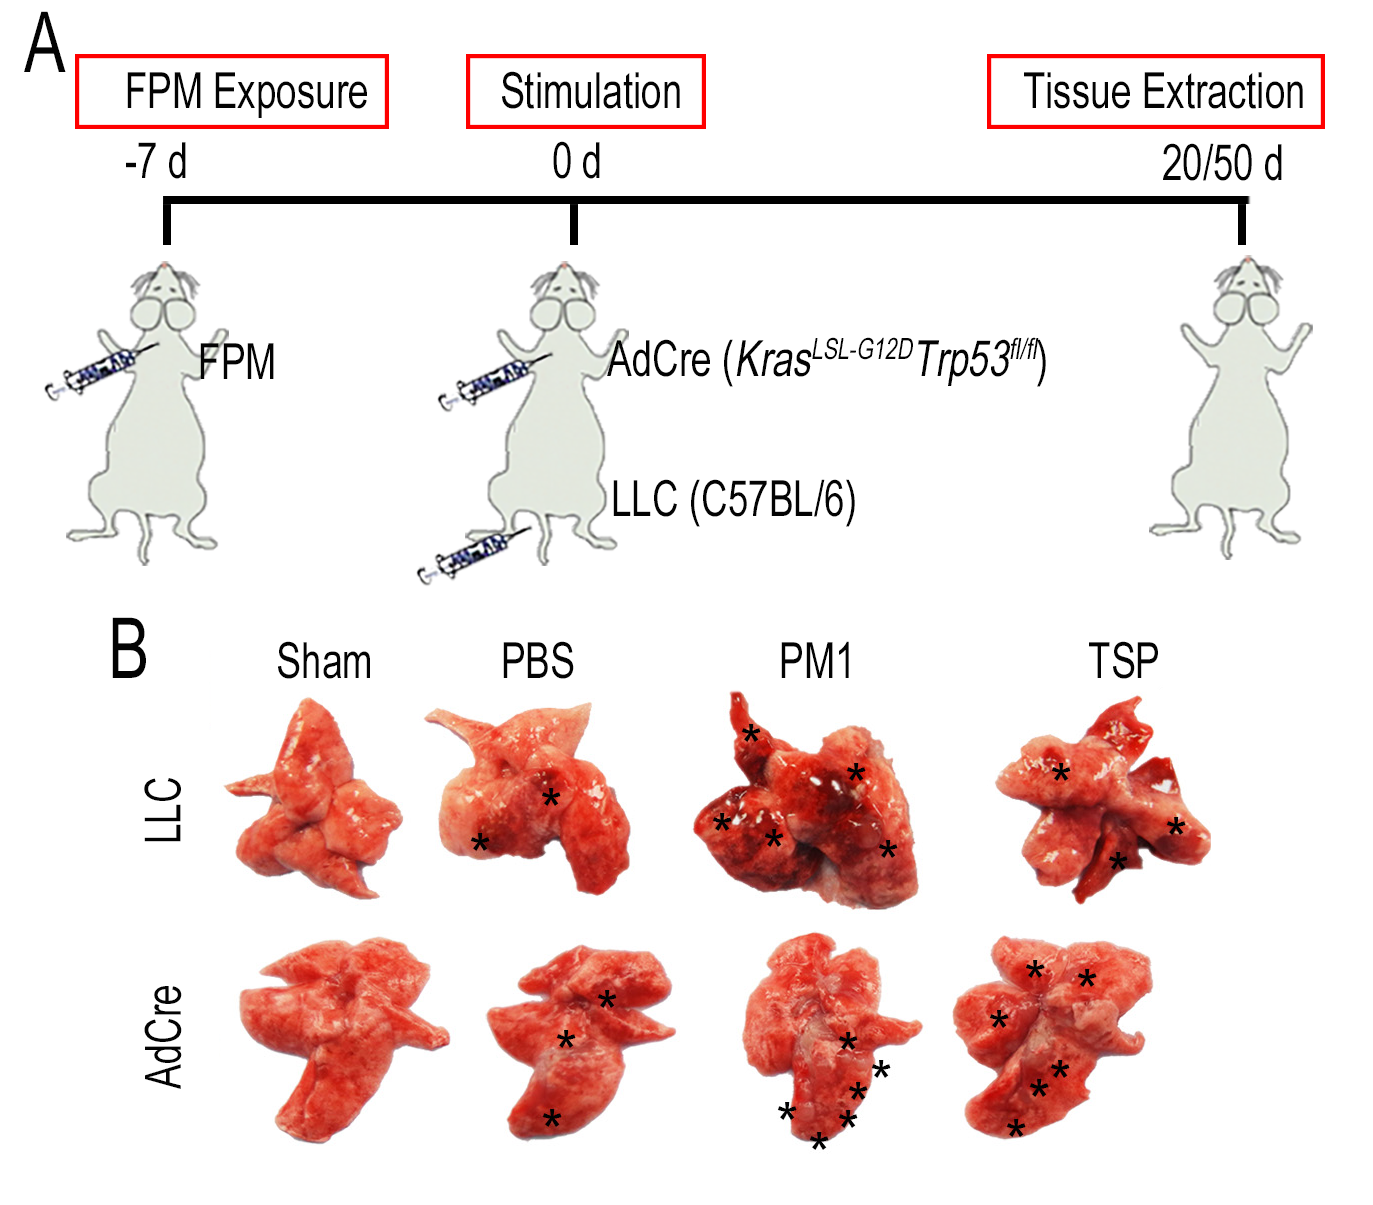

Supplement: supp [file elife-75345-supp-v1.zip › elife_poa_e75345_Figure_1_figure_supplement_2.tif]

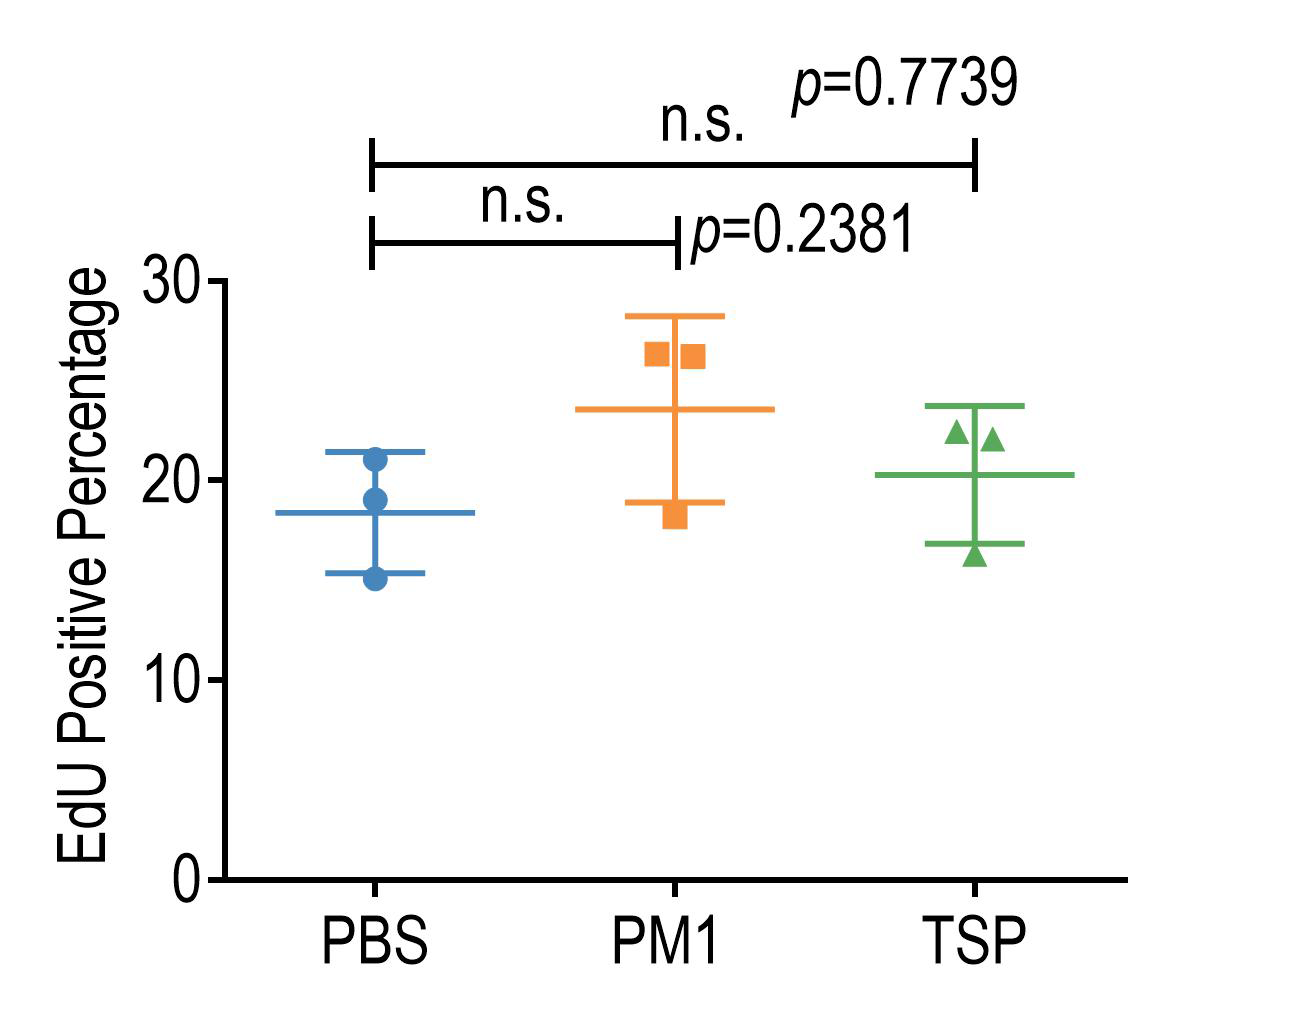

Supplement: supp [file elife-75345-supp-v1.zip › elife_poa_e75345_Figure_1_figure_supplement_4.tif]

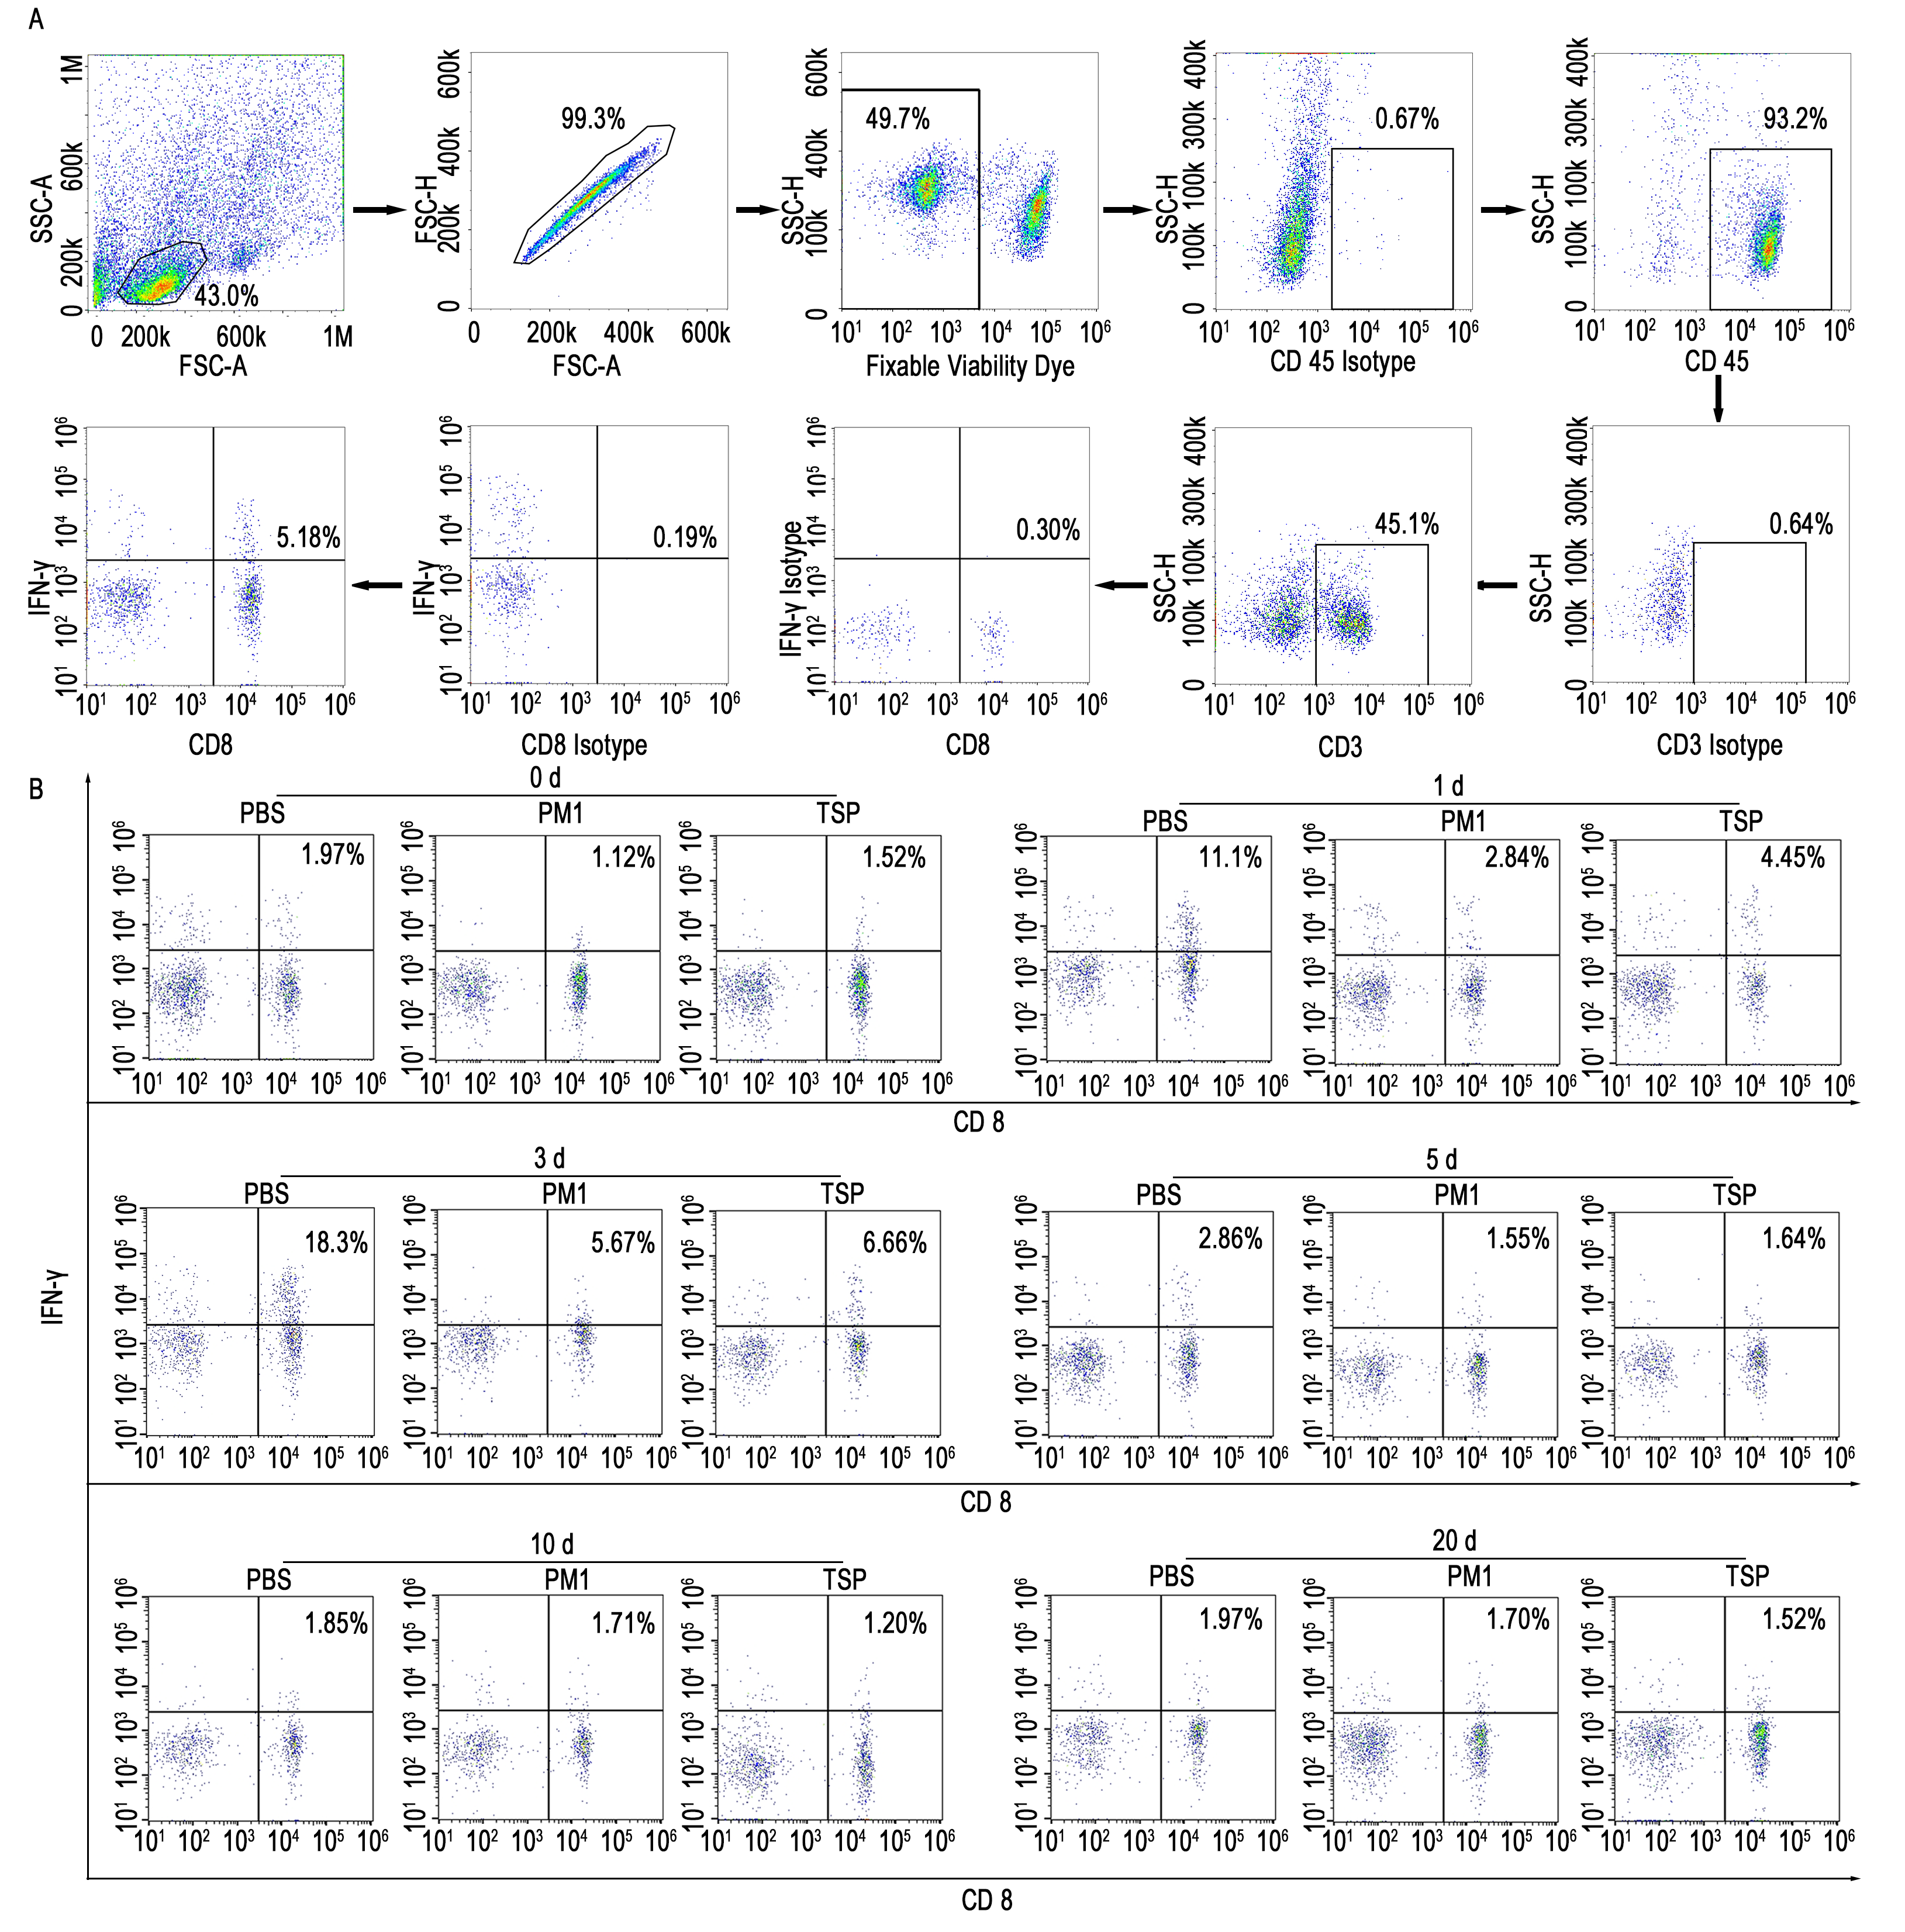

Supplement: supp [file elife-75345-supp-v1.zip › elife_poa_e75345_Figure_1_figure_supplement_5.tif]

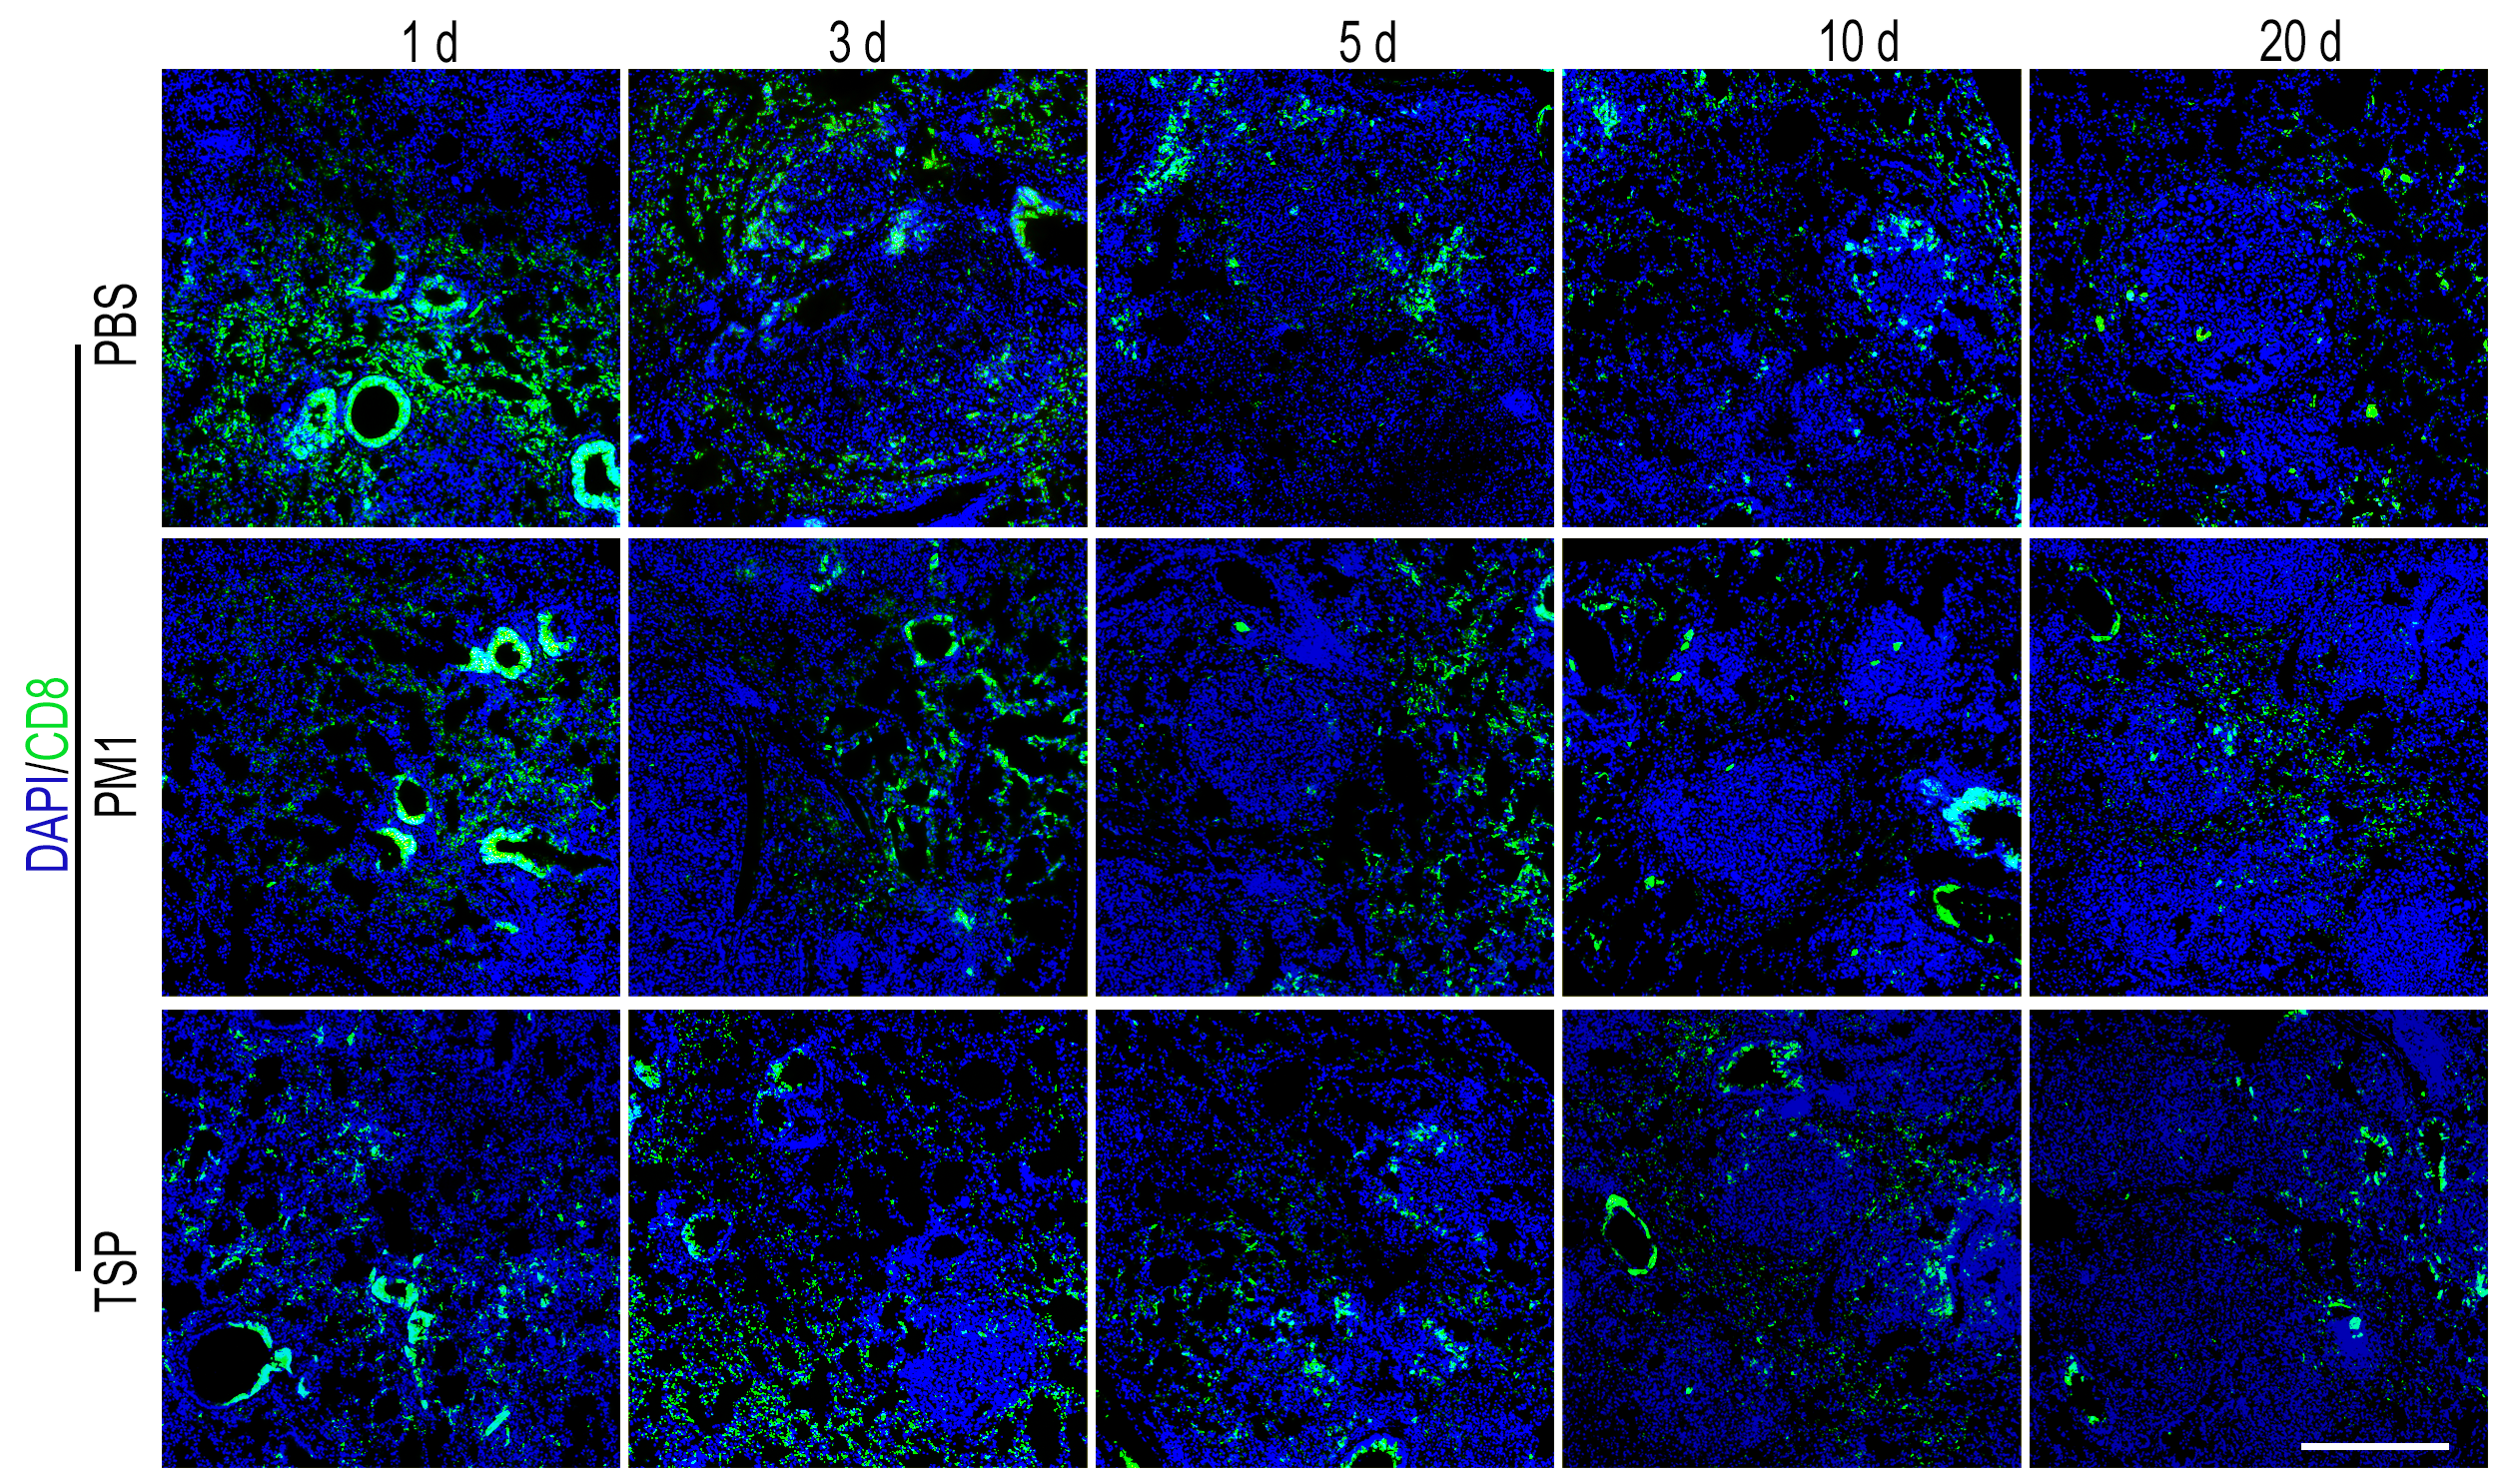

Supplement: supp [file elife-75345-supp-v1.zip › elife_poa_e75345_Figure_1_figure_supplement_6.tif]

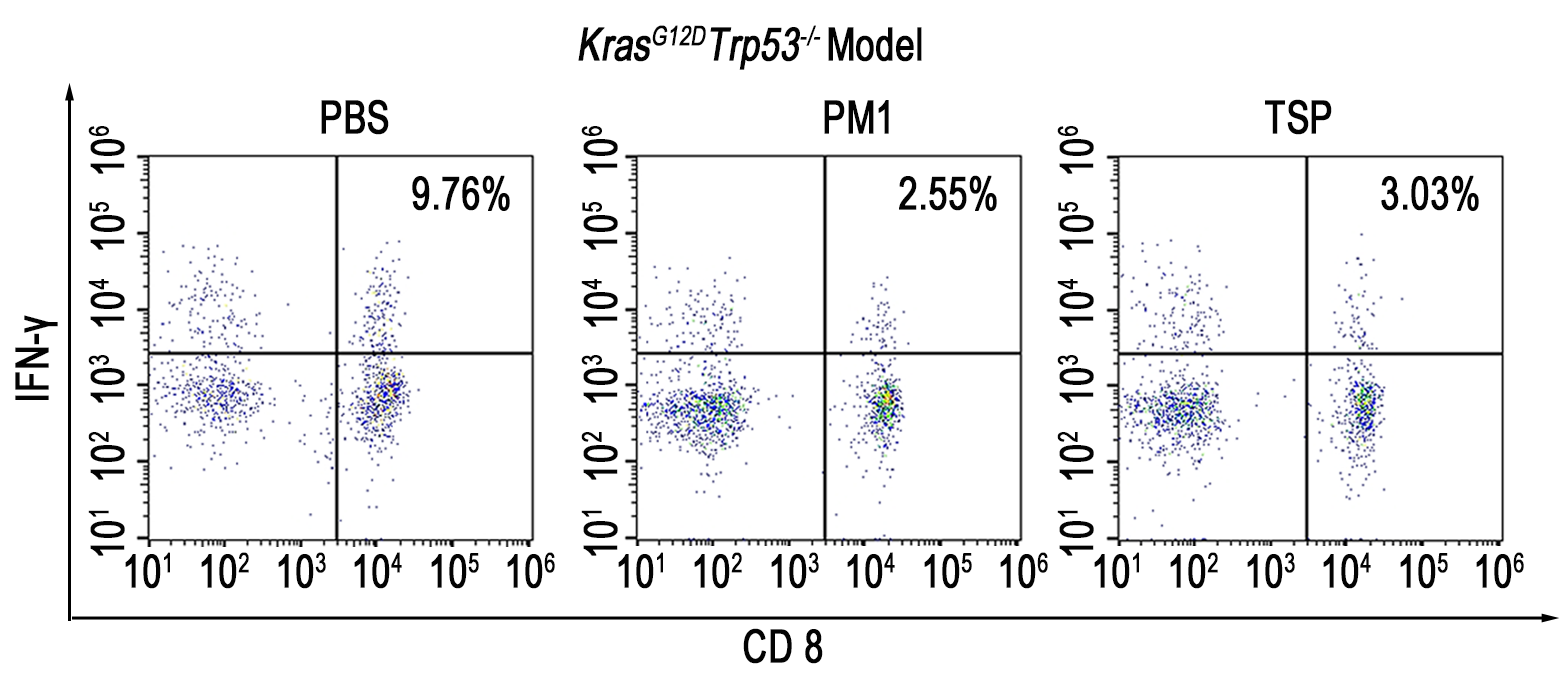

Supplement: supp [file elife-75345-supp-v1.zip › elife_poa_e75345_Figure_1_figure_supplement_7.tif]

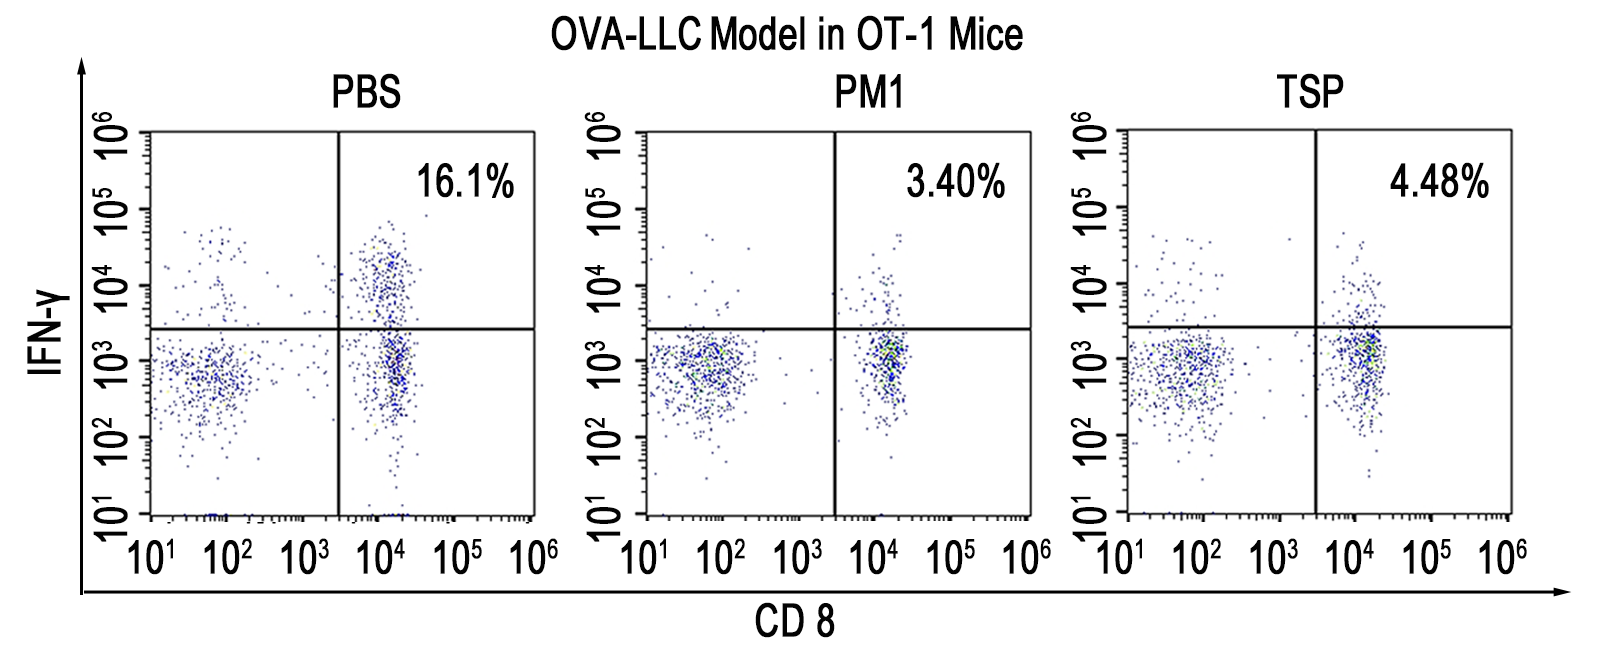

Supplement: supp [file elife-75345-supp-v1.zip › elife_poa_e75345_Figure_1_figure_supplement_8.tif]

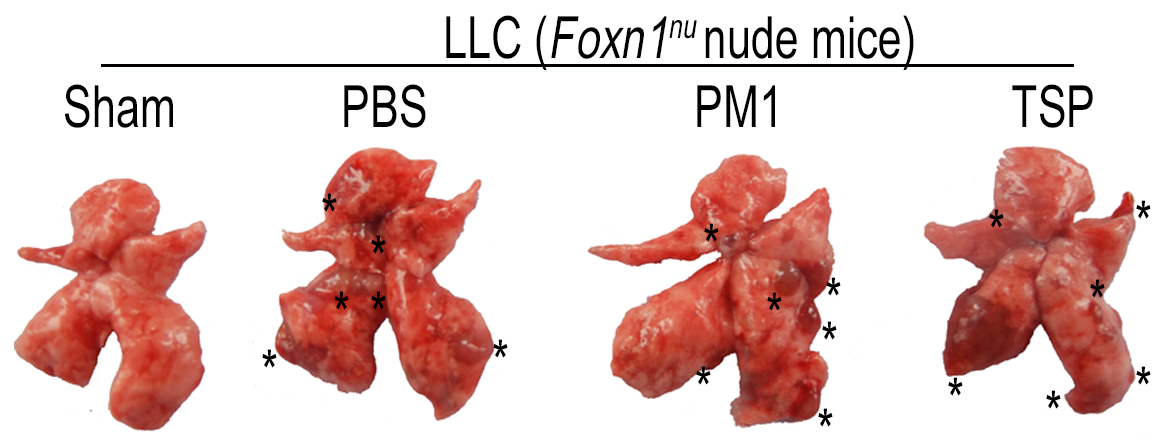

Supplement: supp [file elife-75345-supp-v1.zip › elife_poa_e75345_Figure_1_figure_supplement_9.tif]

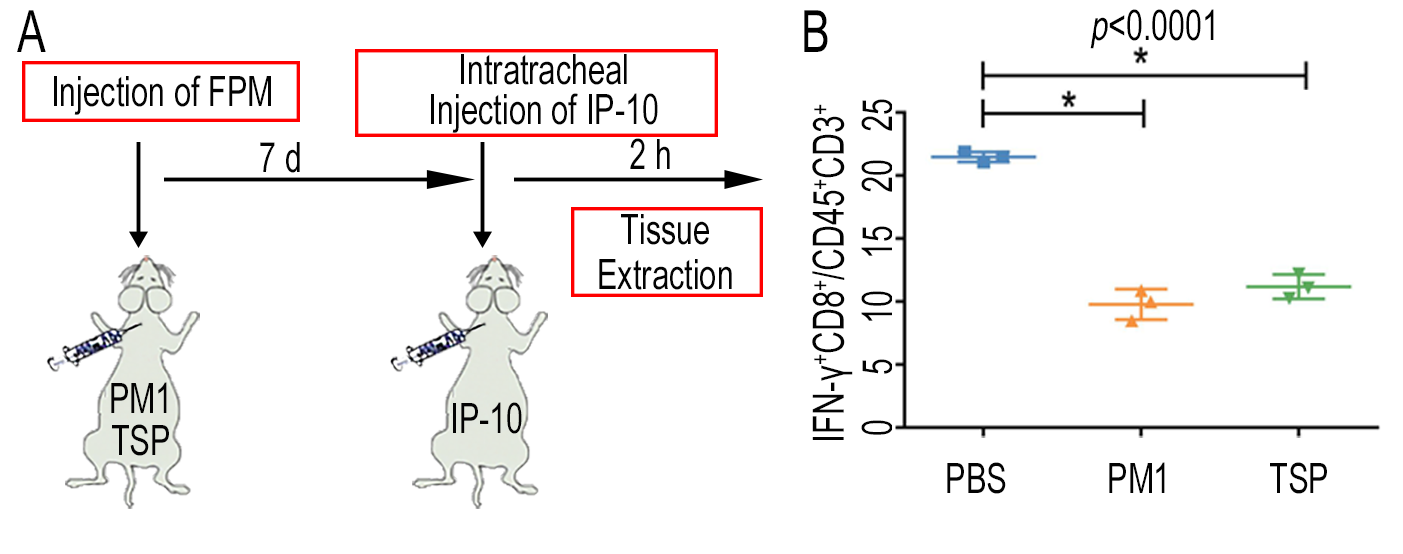

Supplement: supp [file elife-75345-supp-v1.zip › elife_poa_e75345_Figure_1_figure_supplement_10.tif]

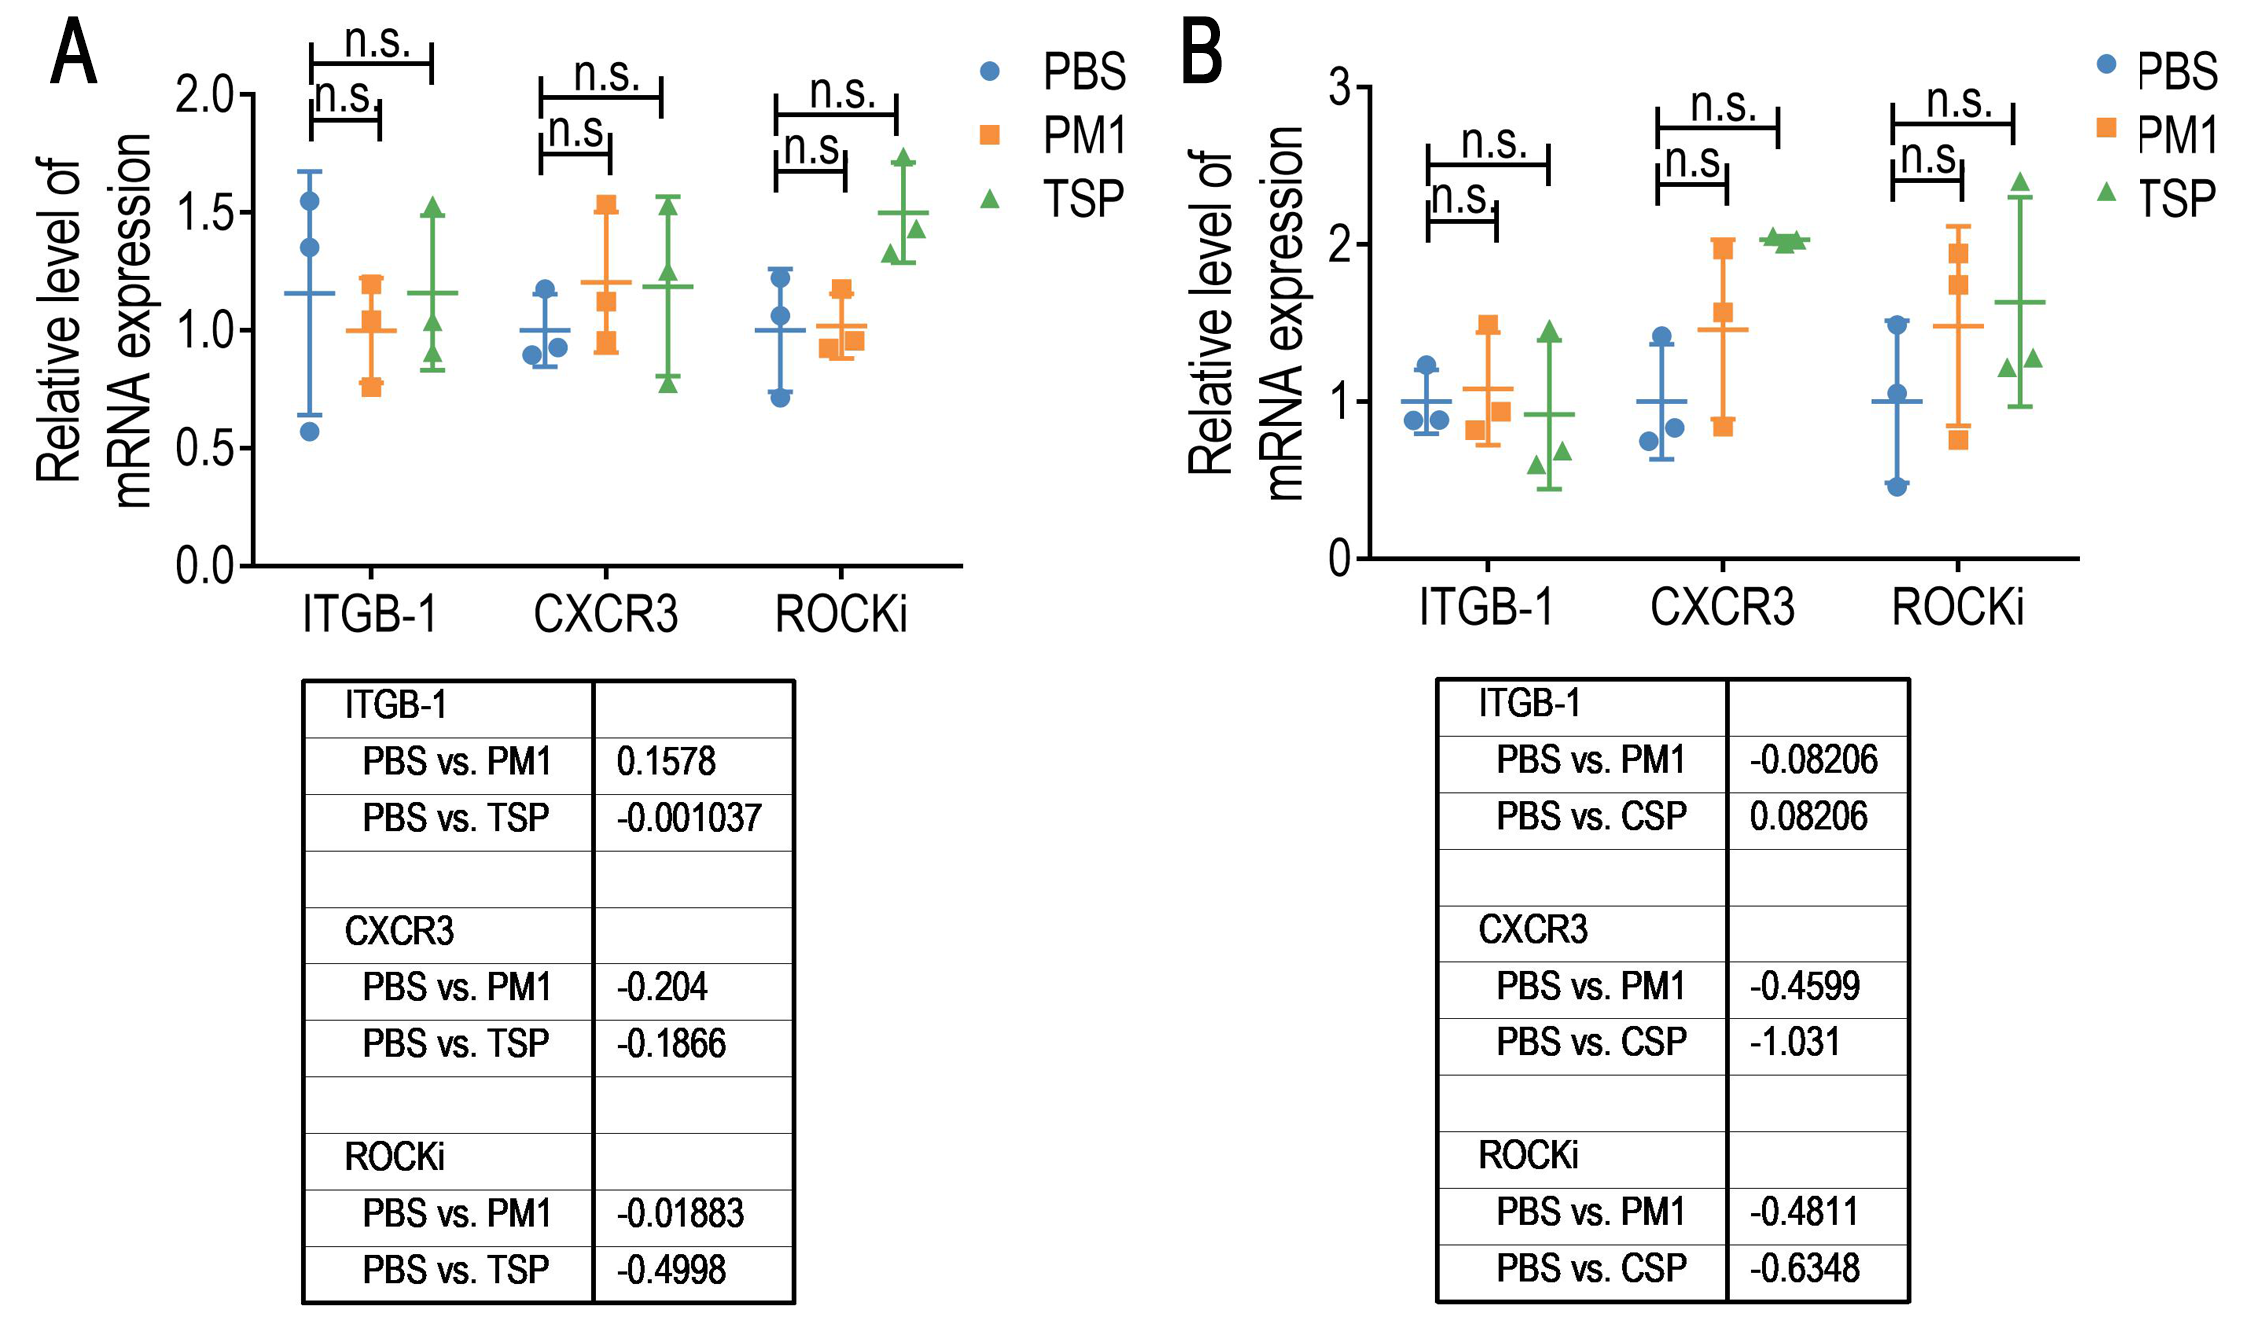

Supplement: supp [file elife-75345-supp-v1.zip › elife_poa_e75345_Figure_2_figure_supplement_1.tif]

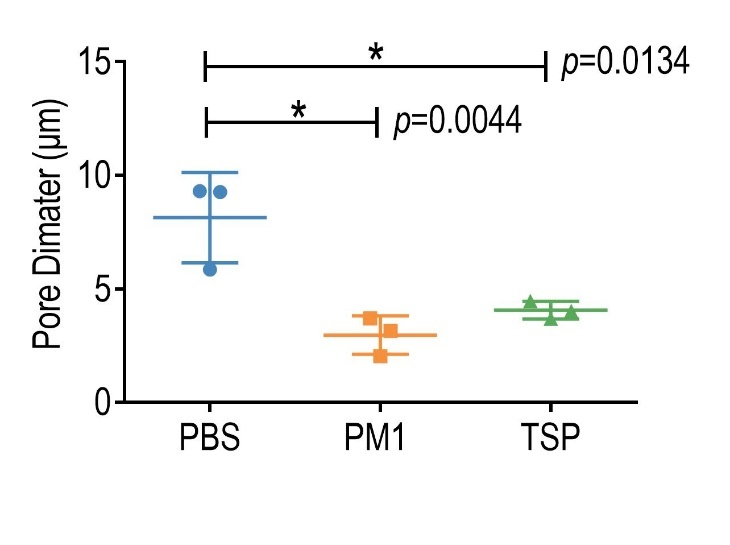

Supplement: supp [file elife-75345-supp-v1.zip › elife_poa_e75345_Figure_2_figure_supplement_2.tif]

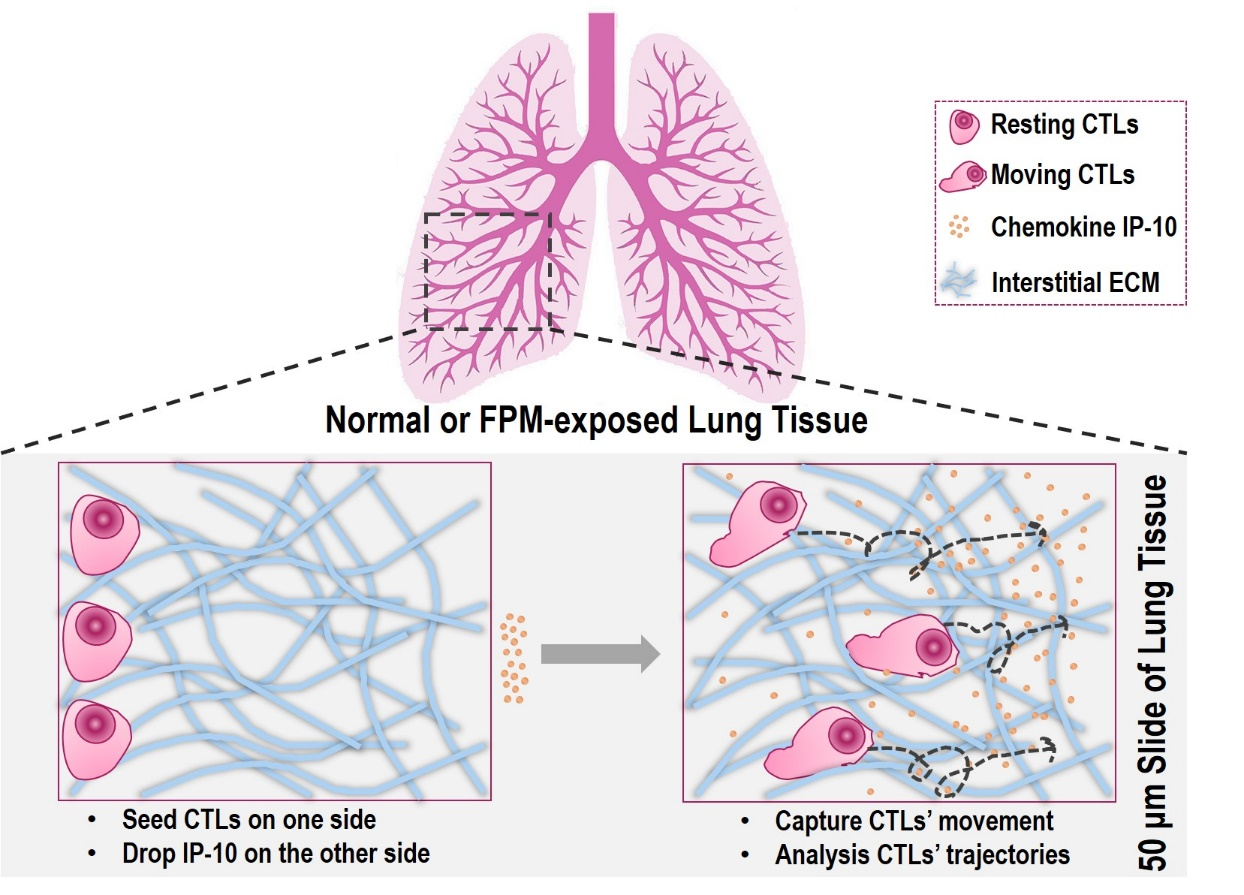

Supplement: supp [file elife-75345-supp-v1.zip › elife_poa_e75345_Figure_2_figure_supplement_3.tif]

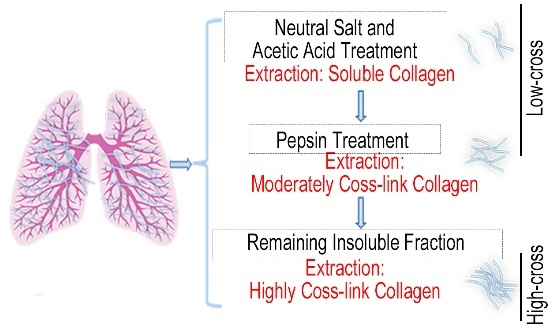

Supplement: supp [file elife-75345-supp-v1.zip › elife_poa_e75345_Figure_2_figure_supplement_4.tif]

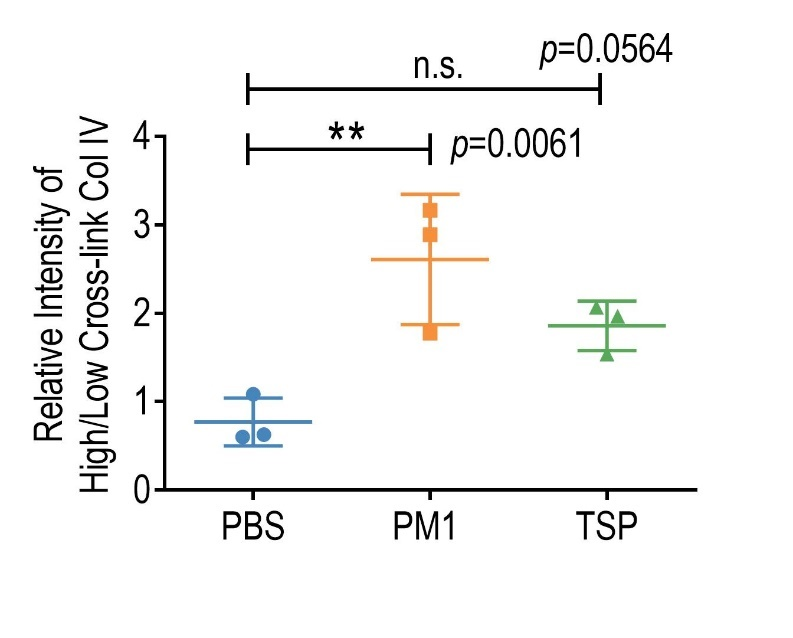

Supplement: supp [file elife-75345-supp-v1.zip › elife_poa_e75345_Figure_2_figure_supplement_5.tif]

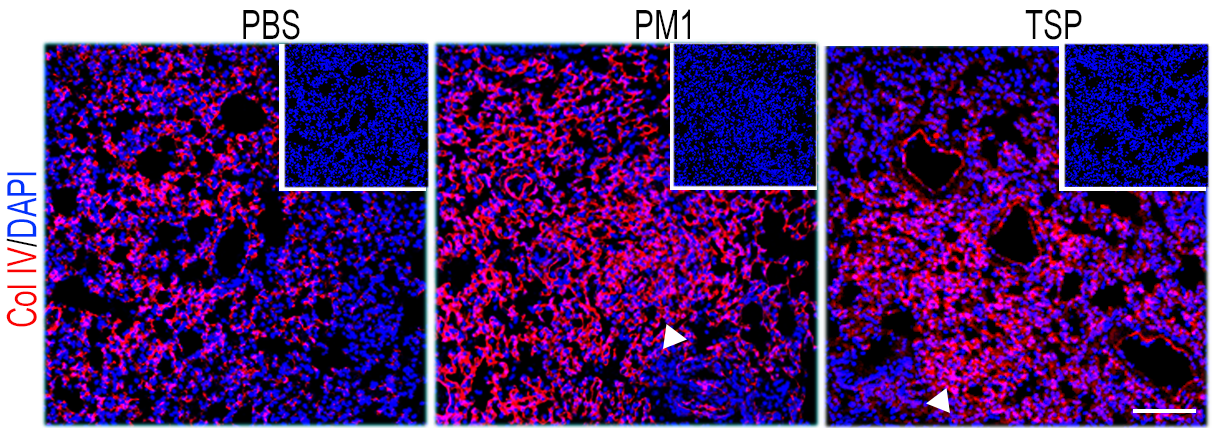

Supplement: supp [file elife-75345-supp-v1.zip › elife_poa_e75345_Figure_2_figure_supplement_6.tif]

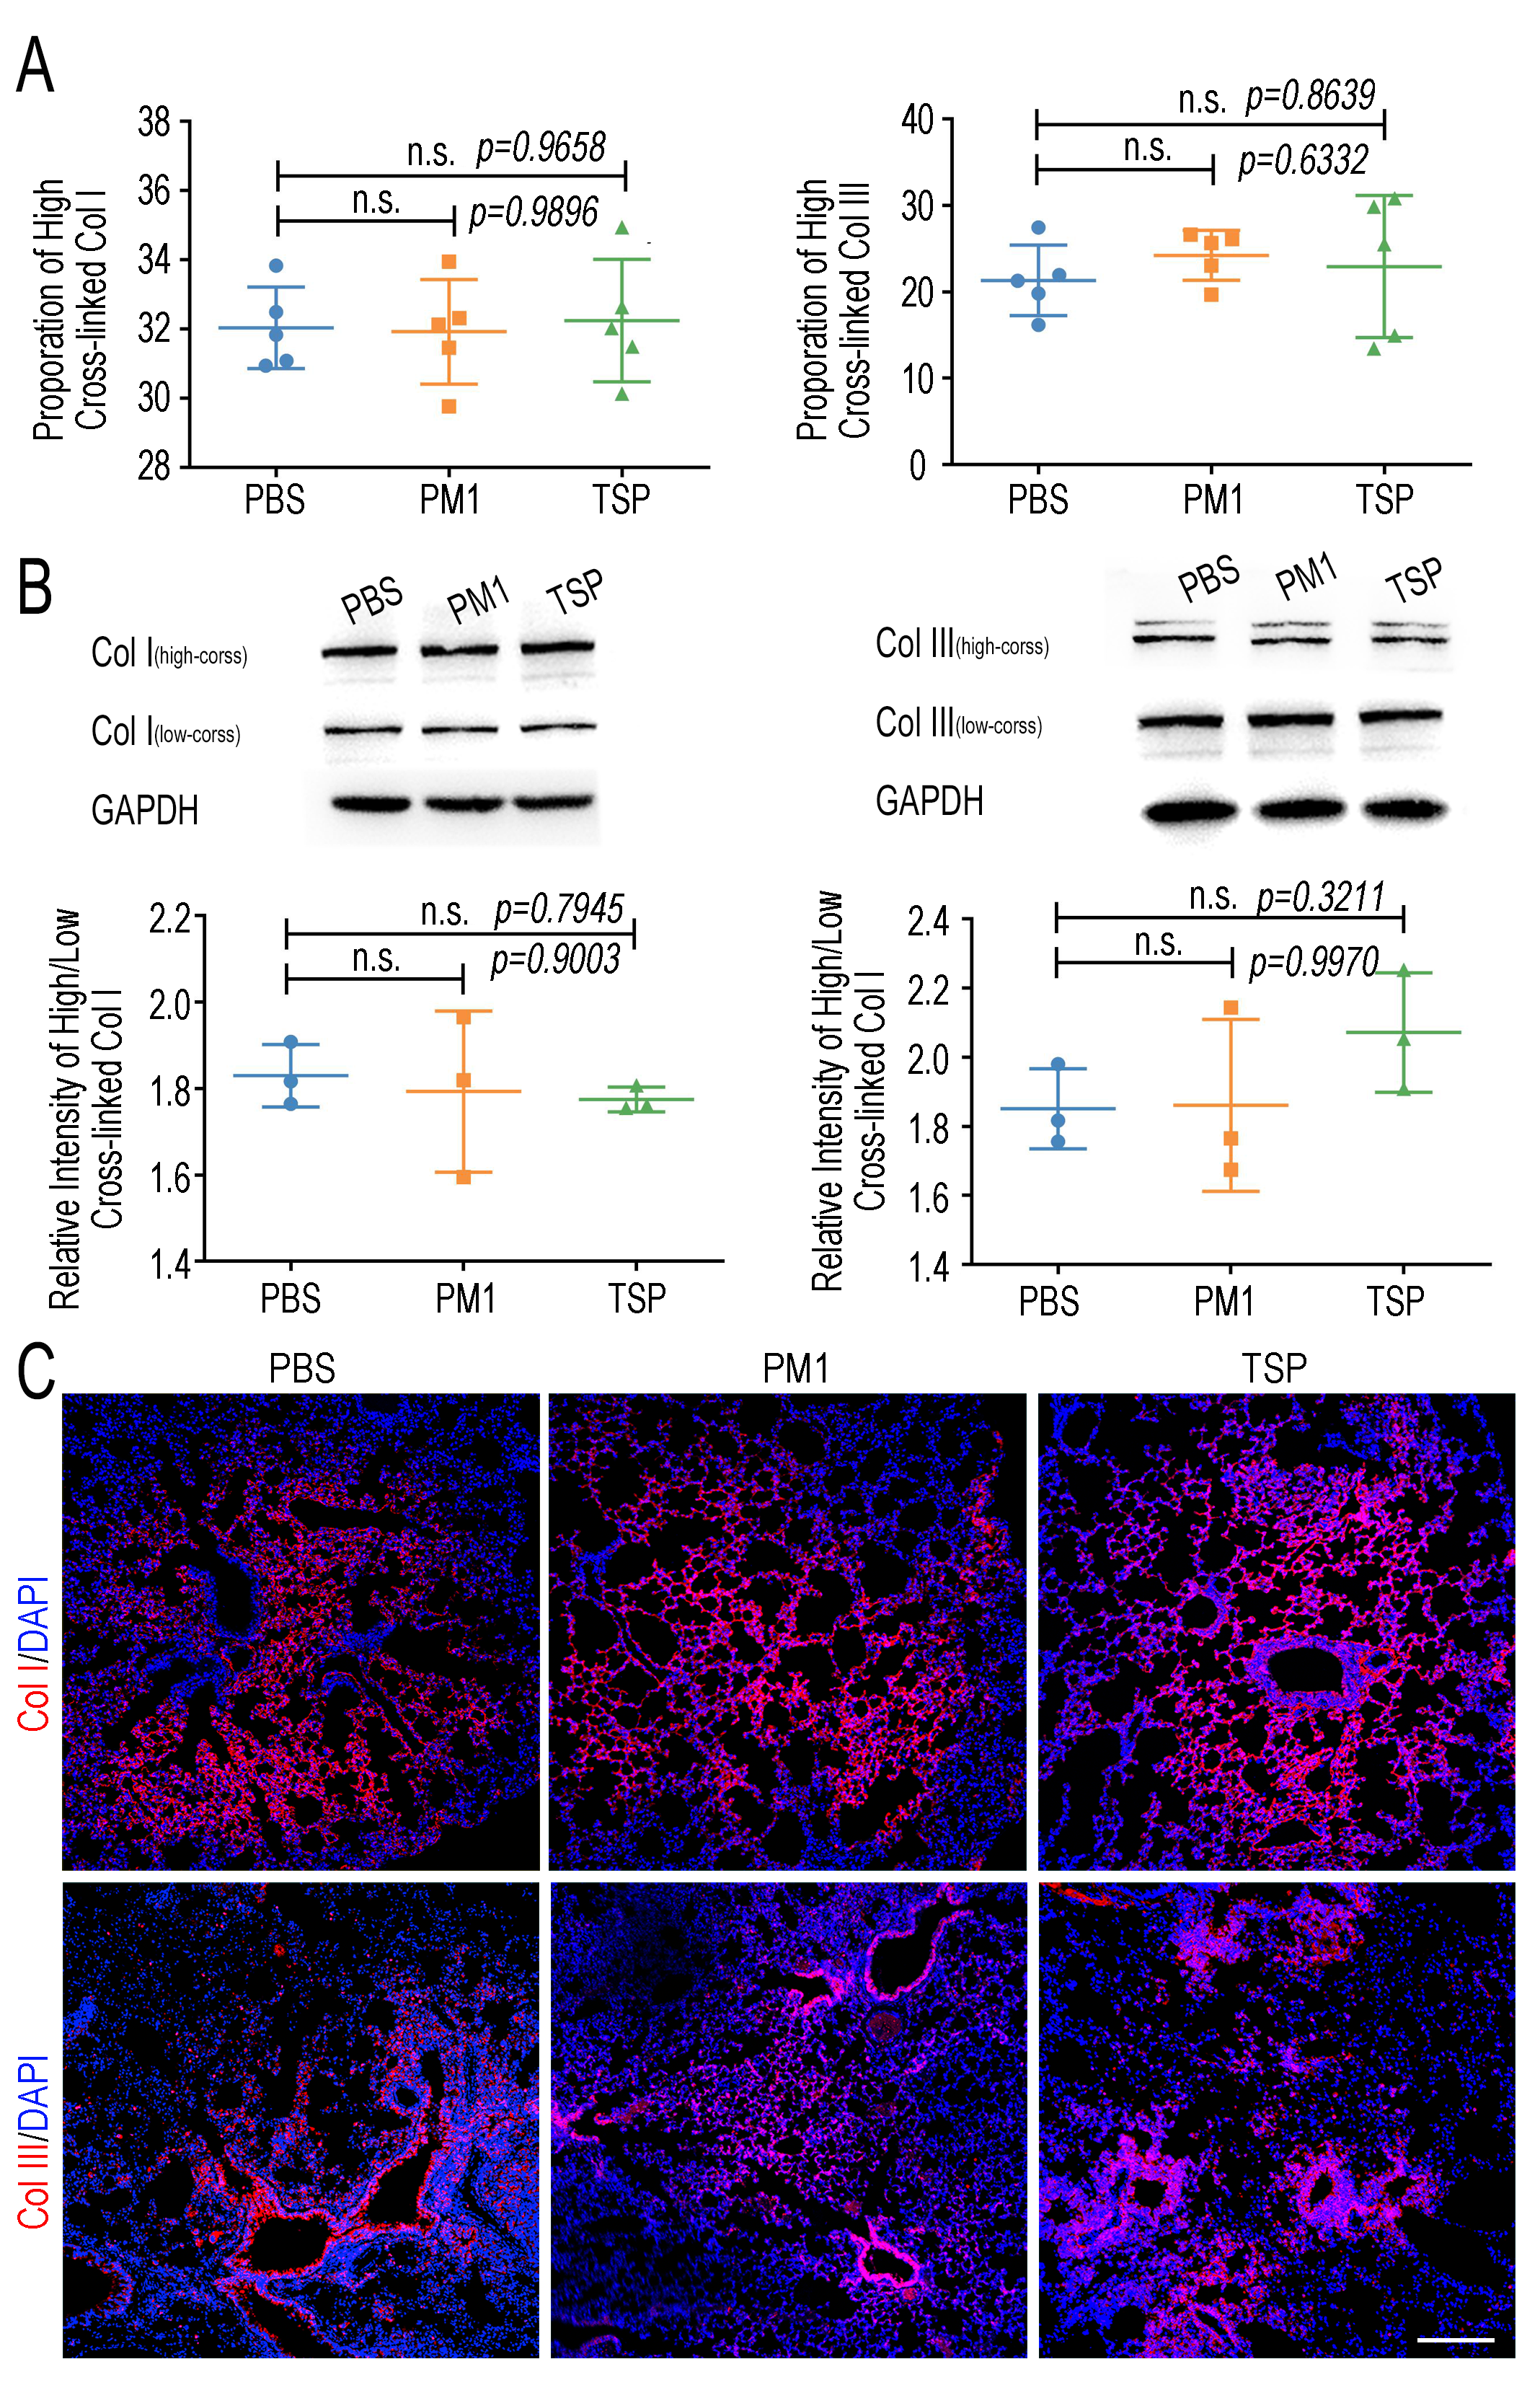

Supplement: supp [file elife-75345-supp-v1.zip › elife_poa_e75345_Figure_2_figure_supplement_7.tif]

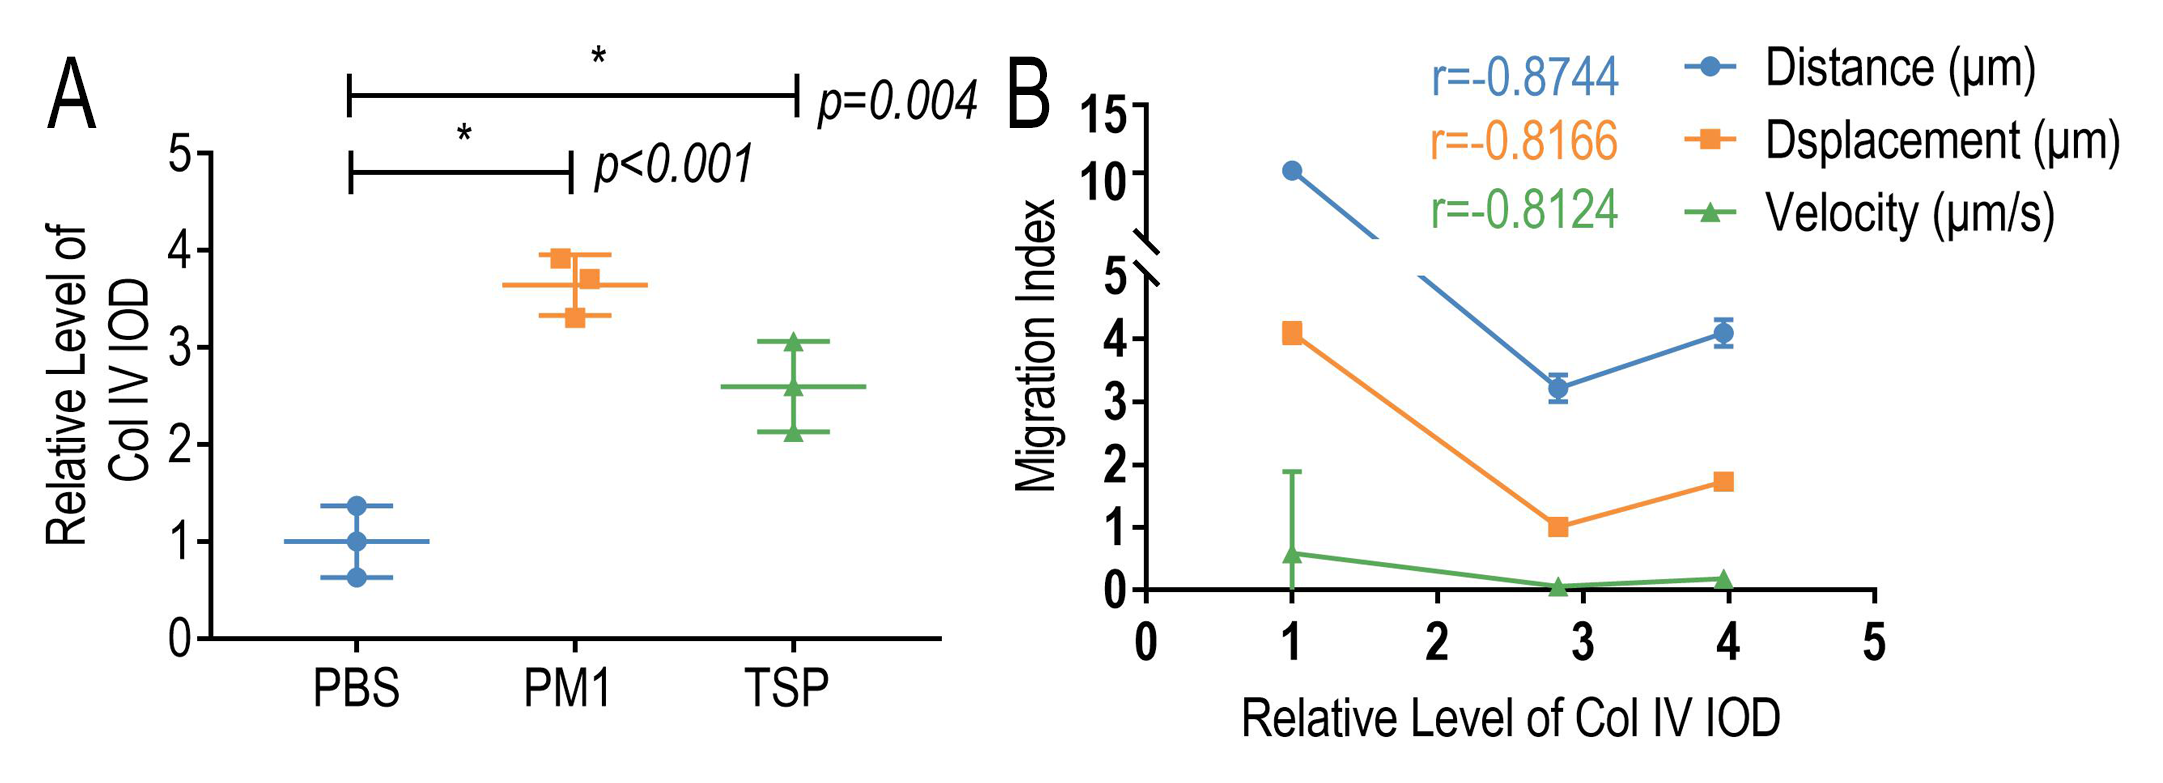

Supplement: supp [file elife-75345-supp-v1.zip › elife_poa_e75345_Figure_2_figure_supplement_8.tif]

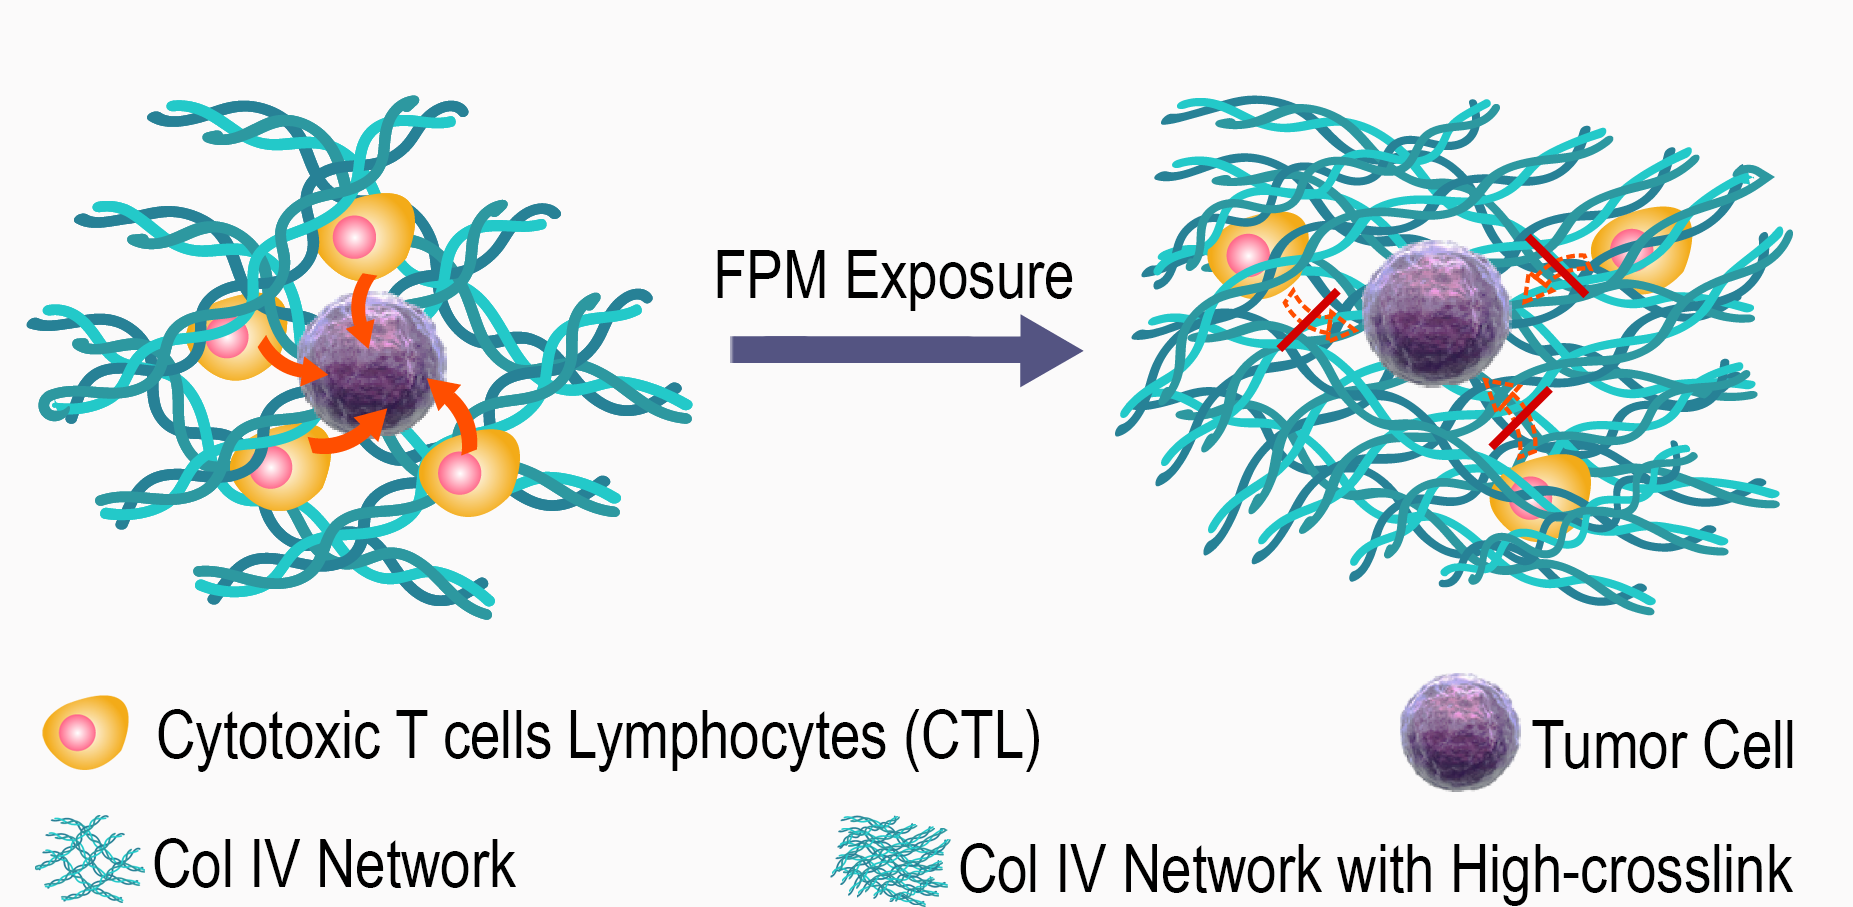

Supplement: supp [file elife-75345-supp-v1.zip › elife_poa_e75345_Figure_2_figure_supplement_9.tif]

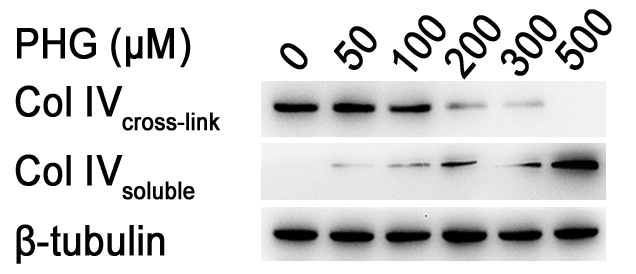

Supplement: supp [file elife-75345-supp-v1.zip › elife_poa_e75345_Figure_3_figure_supplement_1.tif]

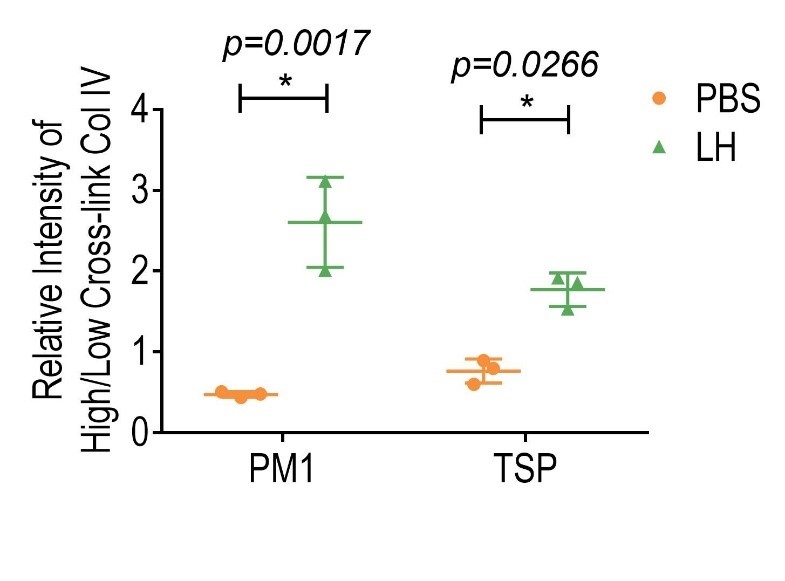

Supplement: supp [file elife-75345-supp-v1.zip › elife_poa_e75345_Figure_3_figure_supplement_2.jpg]

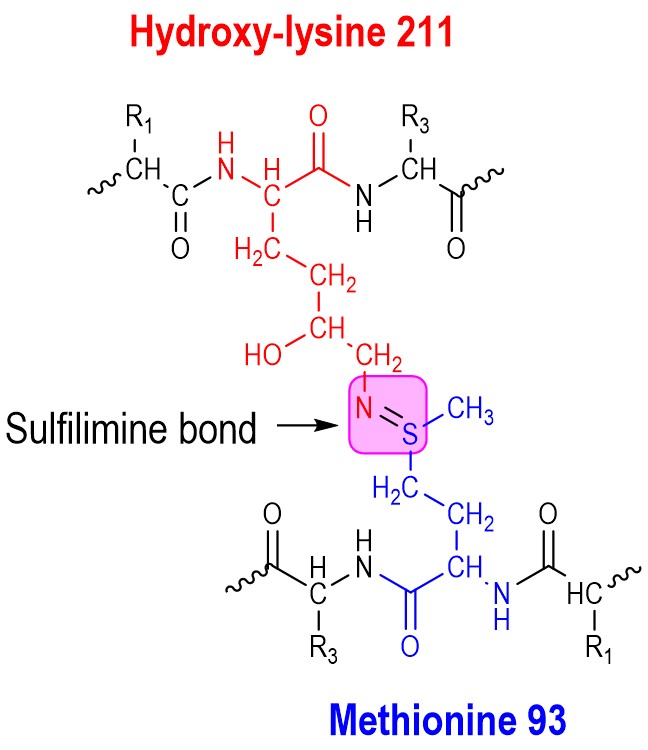

Supplement: supp [file elife-75345-supp-v1.zip › elife_poa_e75345_Figure_3_figure_supplement_3.jpg]

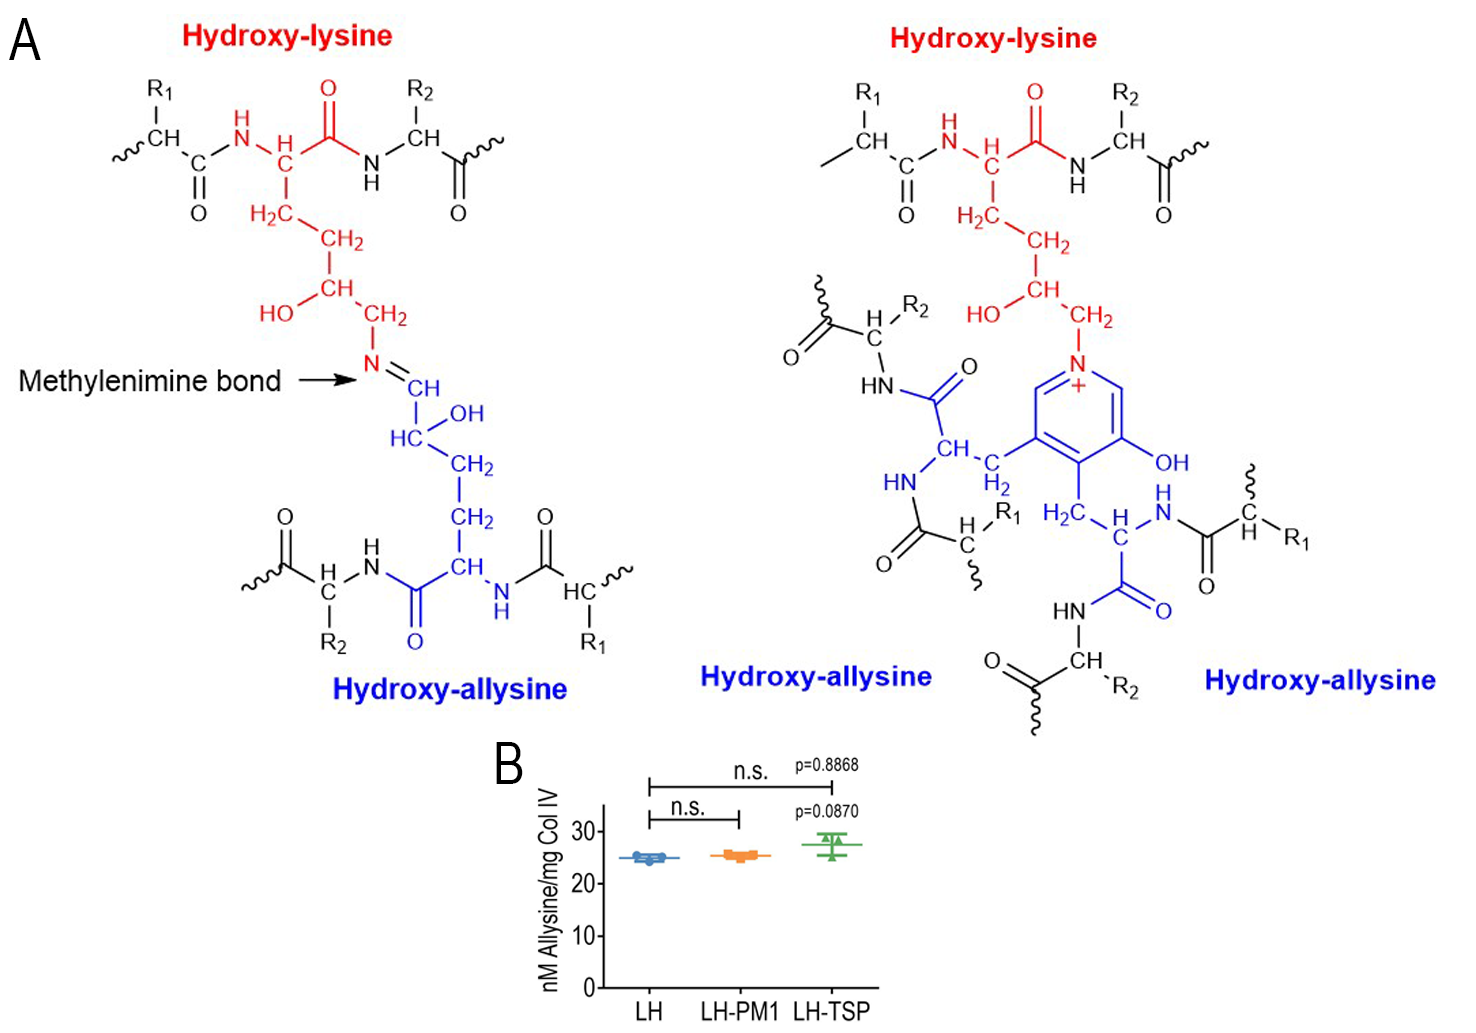

Supplement: supp [file elife-75345-supp-v1.zip › elife_poa_e75345_Figure_3_figure_supplement_4.tif]

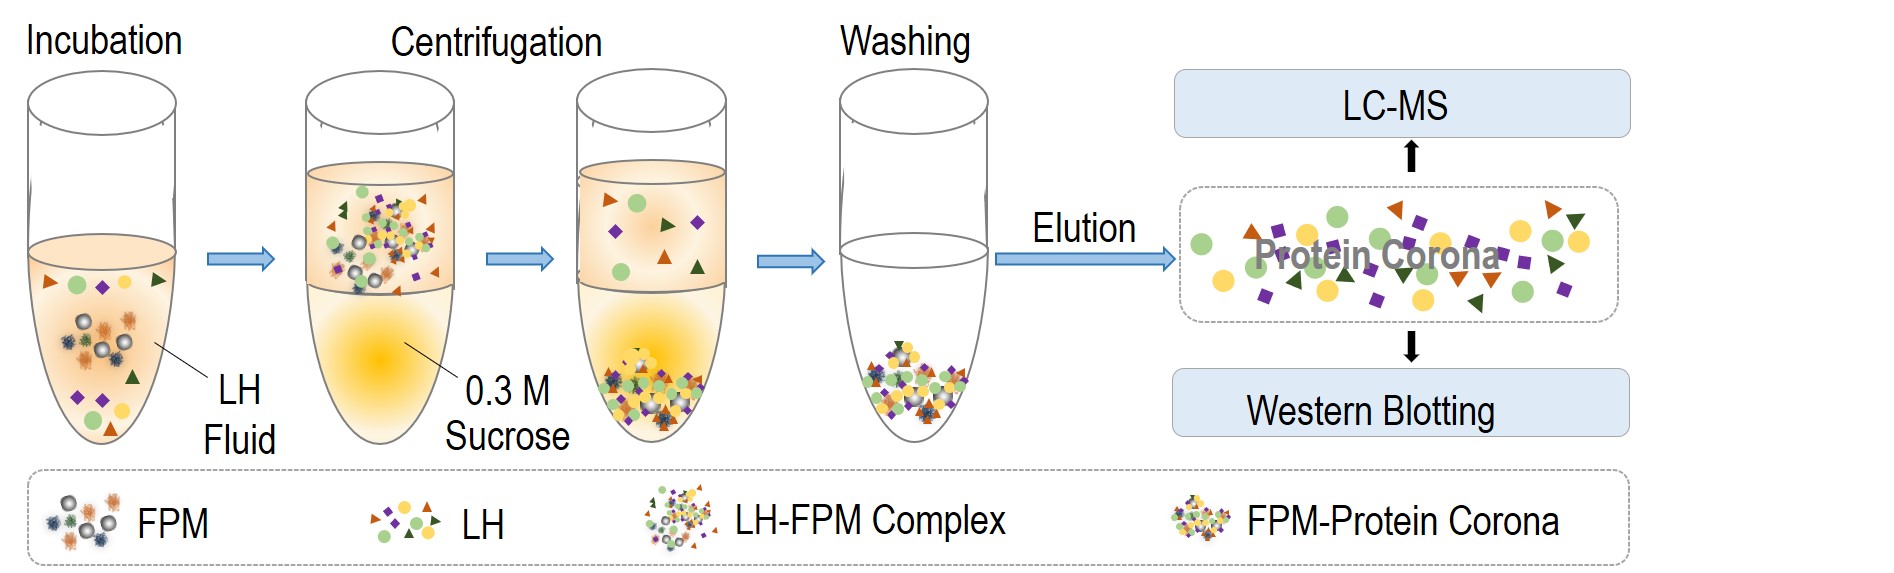

Supplement: supp [file elife-75345-supp-v1.zip › elife_poa_e75345_Figure_4_figure_supplement_1.jpg]

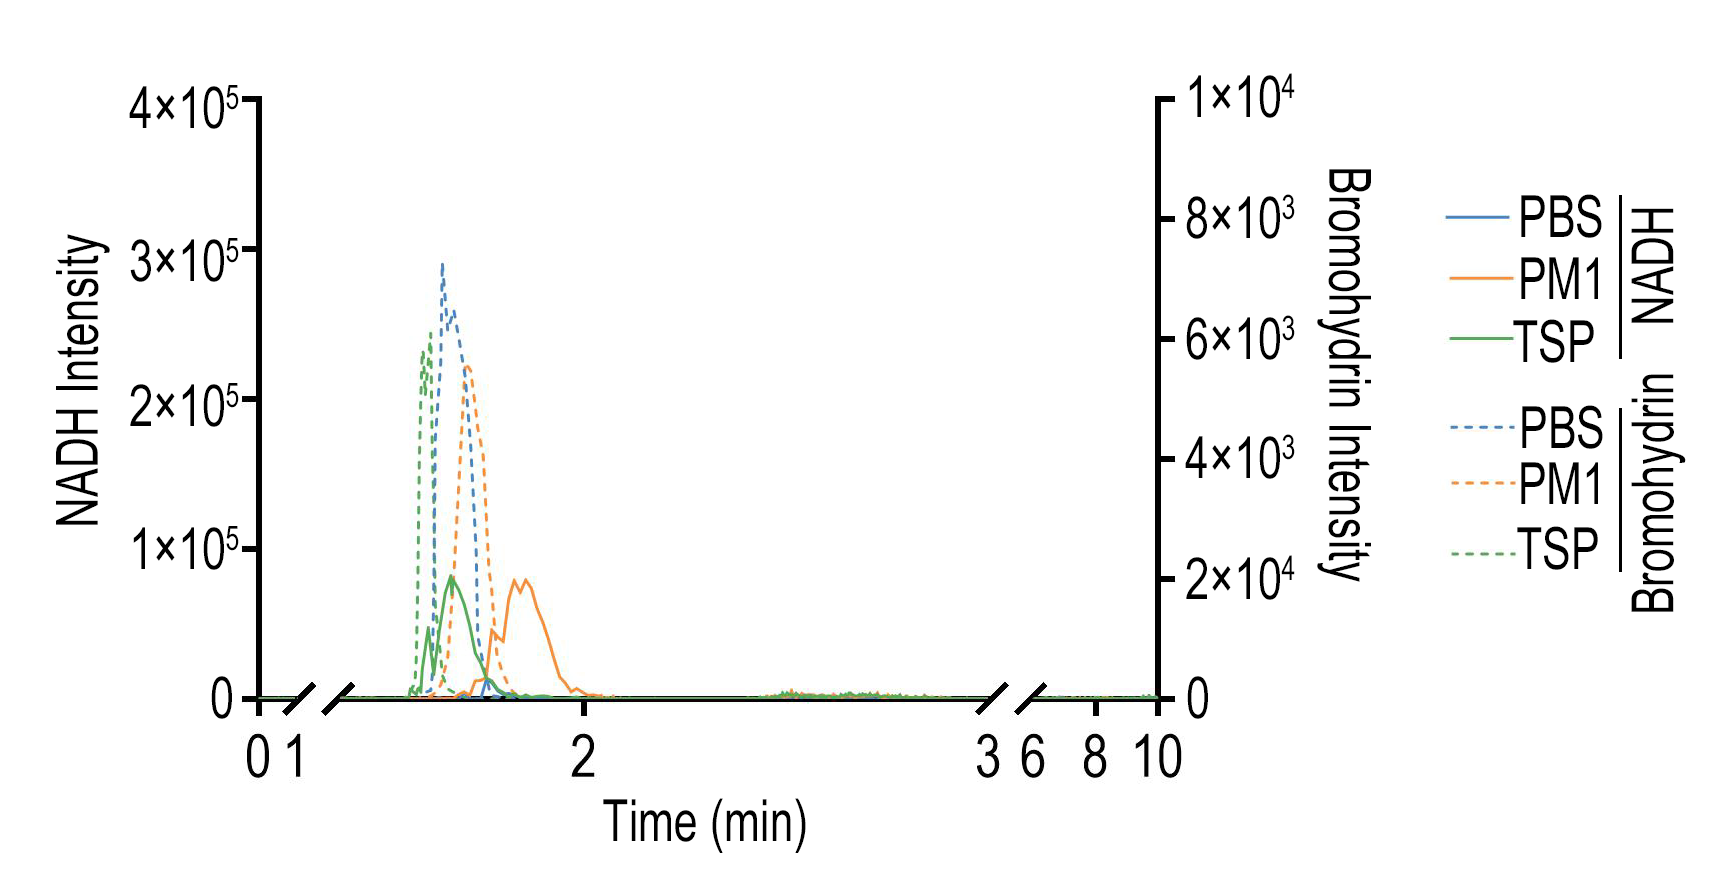

Supplement: supp [file elife-75345-supp-v1.zip › elife_poa_e75345_Figure_4_figure_supplement_2.tif]

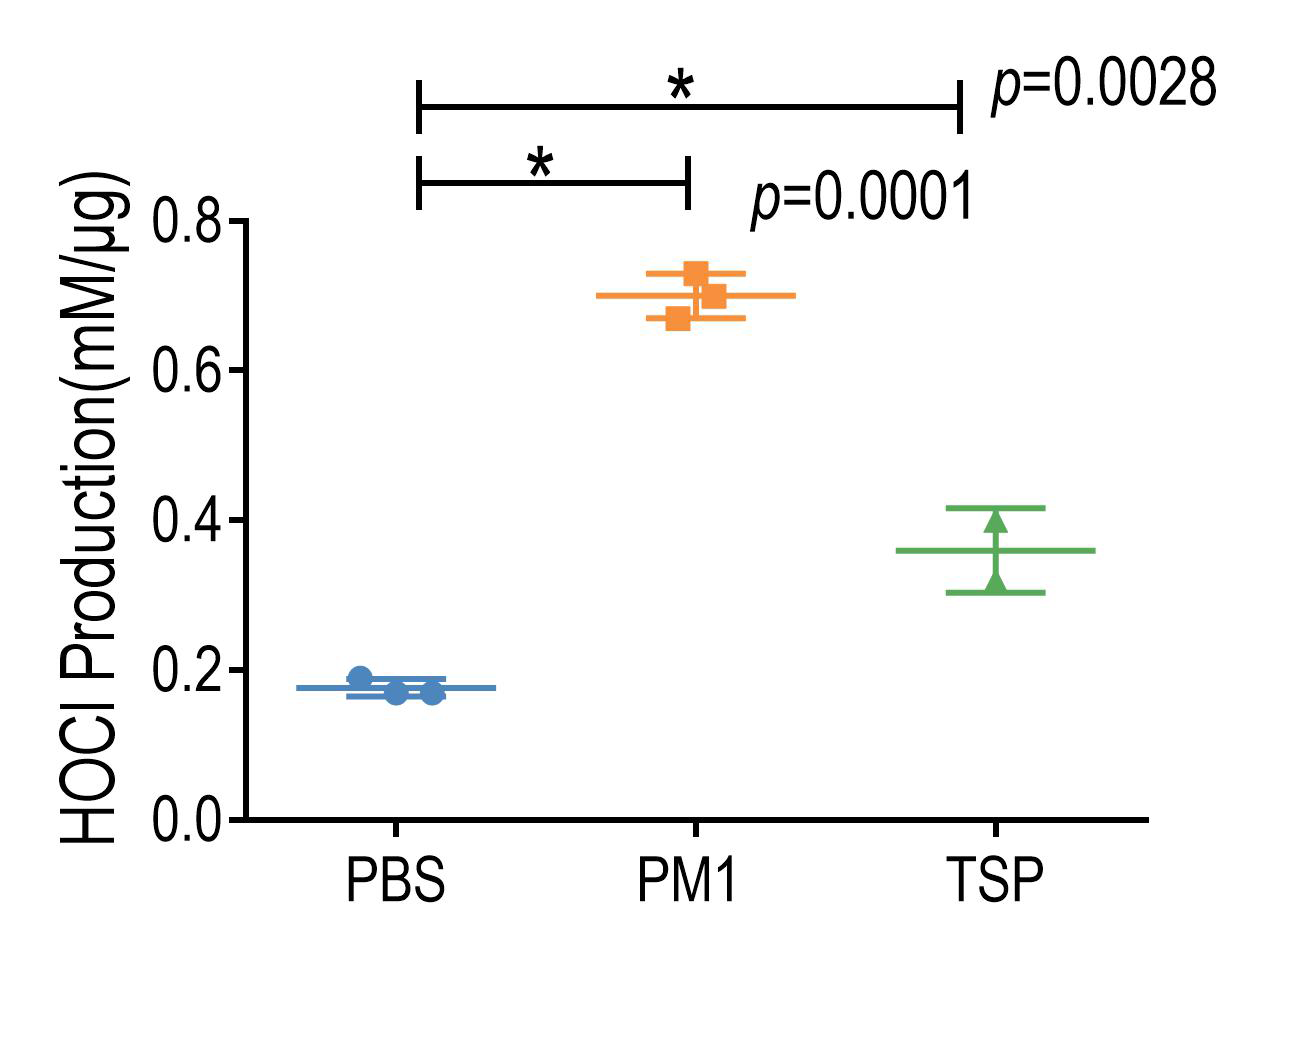

Supplement: supp [file elife-75345-supp-v1.zip › elife_poa_e75345_Figure_4_figure_supplement_3.tif]

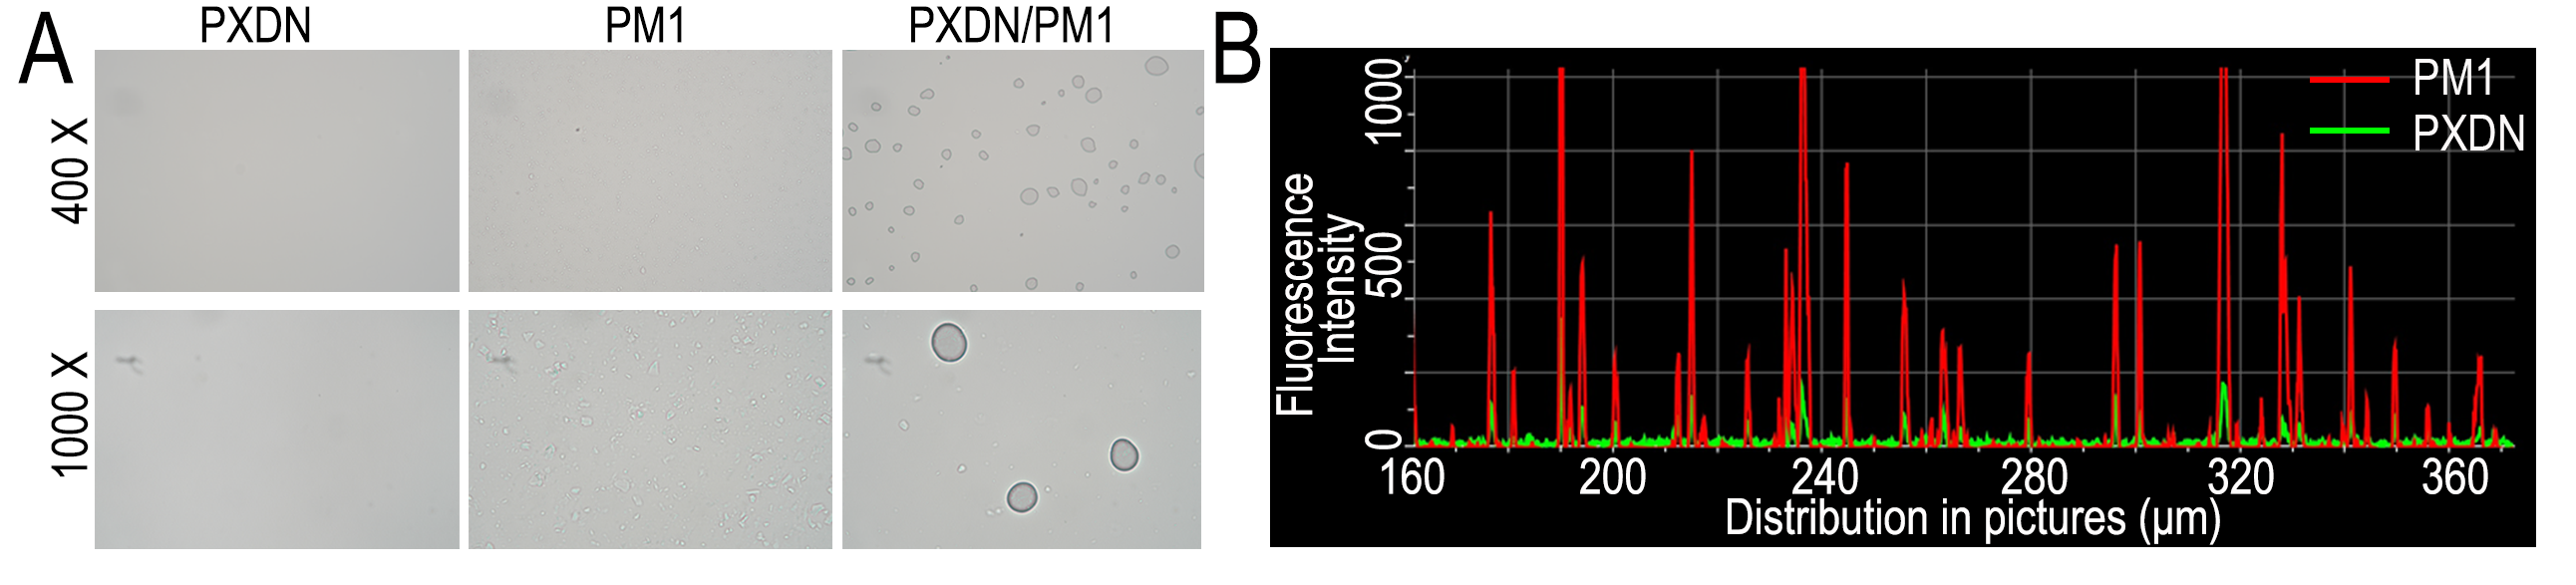

Supplement: supp [file elife-75345-supp-v1.zip › elife_poa_e75345_Figure_4_figure_supplement_4.tif]

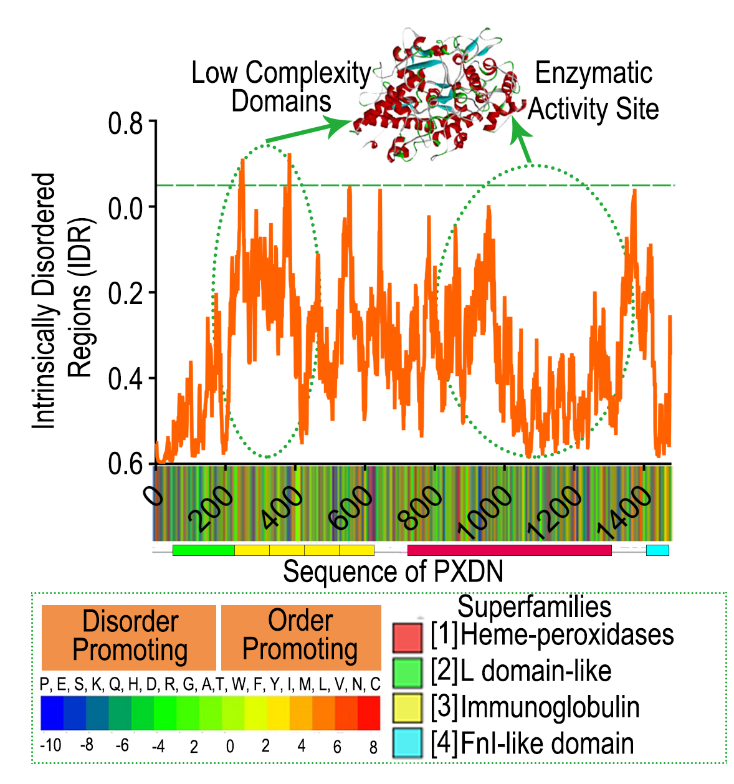

Supplement: supp [file elife-75345-supp-v1.zip › elife_poa_e75345_Figure_4_figure_supplement_5.tif]

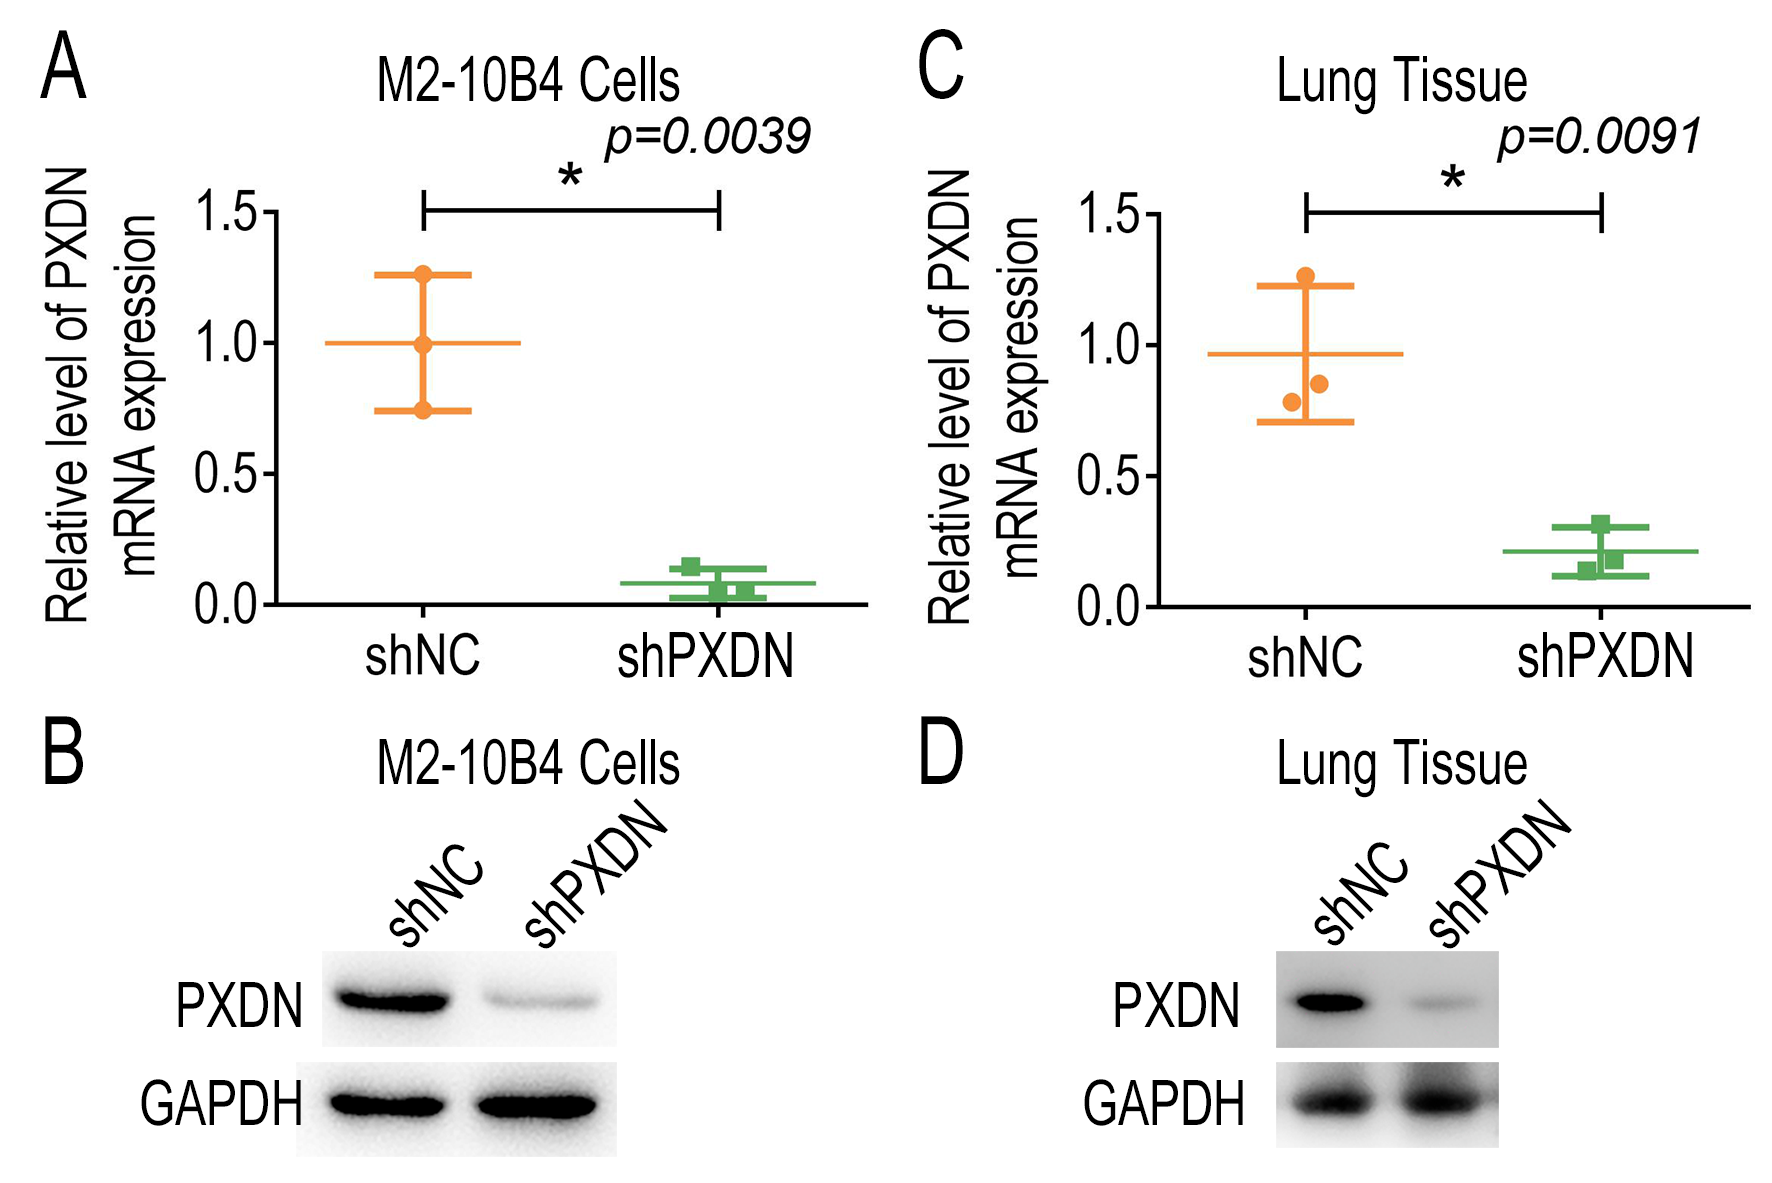

Supplement: supp [file elife-75345-supp-v1.zip › elife_poa_e75345_Figure_5_figure_supplement_1.tif]

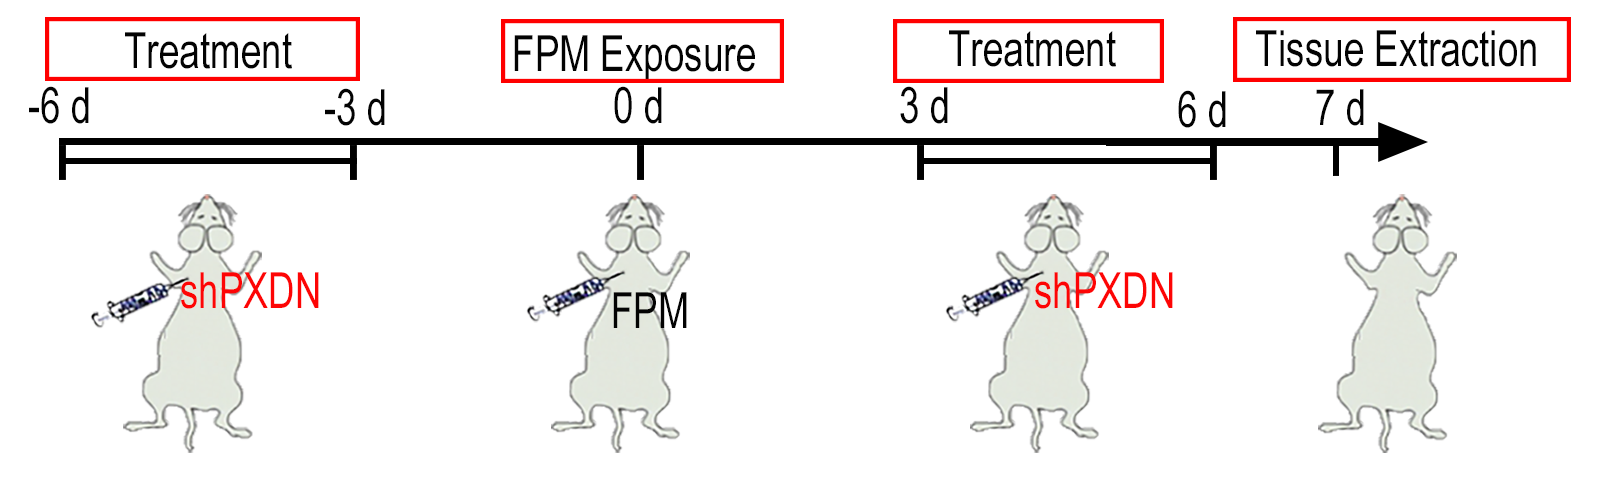

Supplement: supp [file elife-75345-supp-v1.zip › elife_poa_e75345_Figure_5_figure_supplement_2.tif]

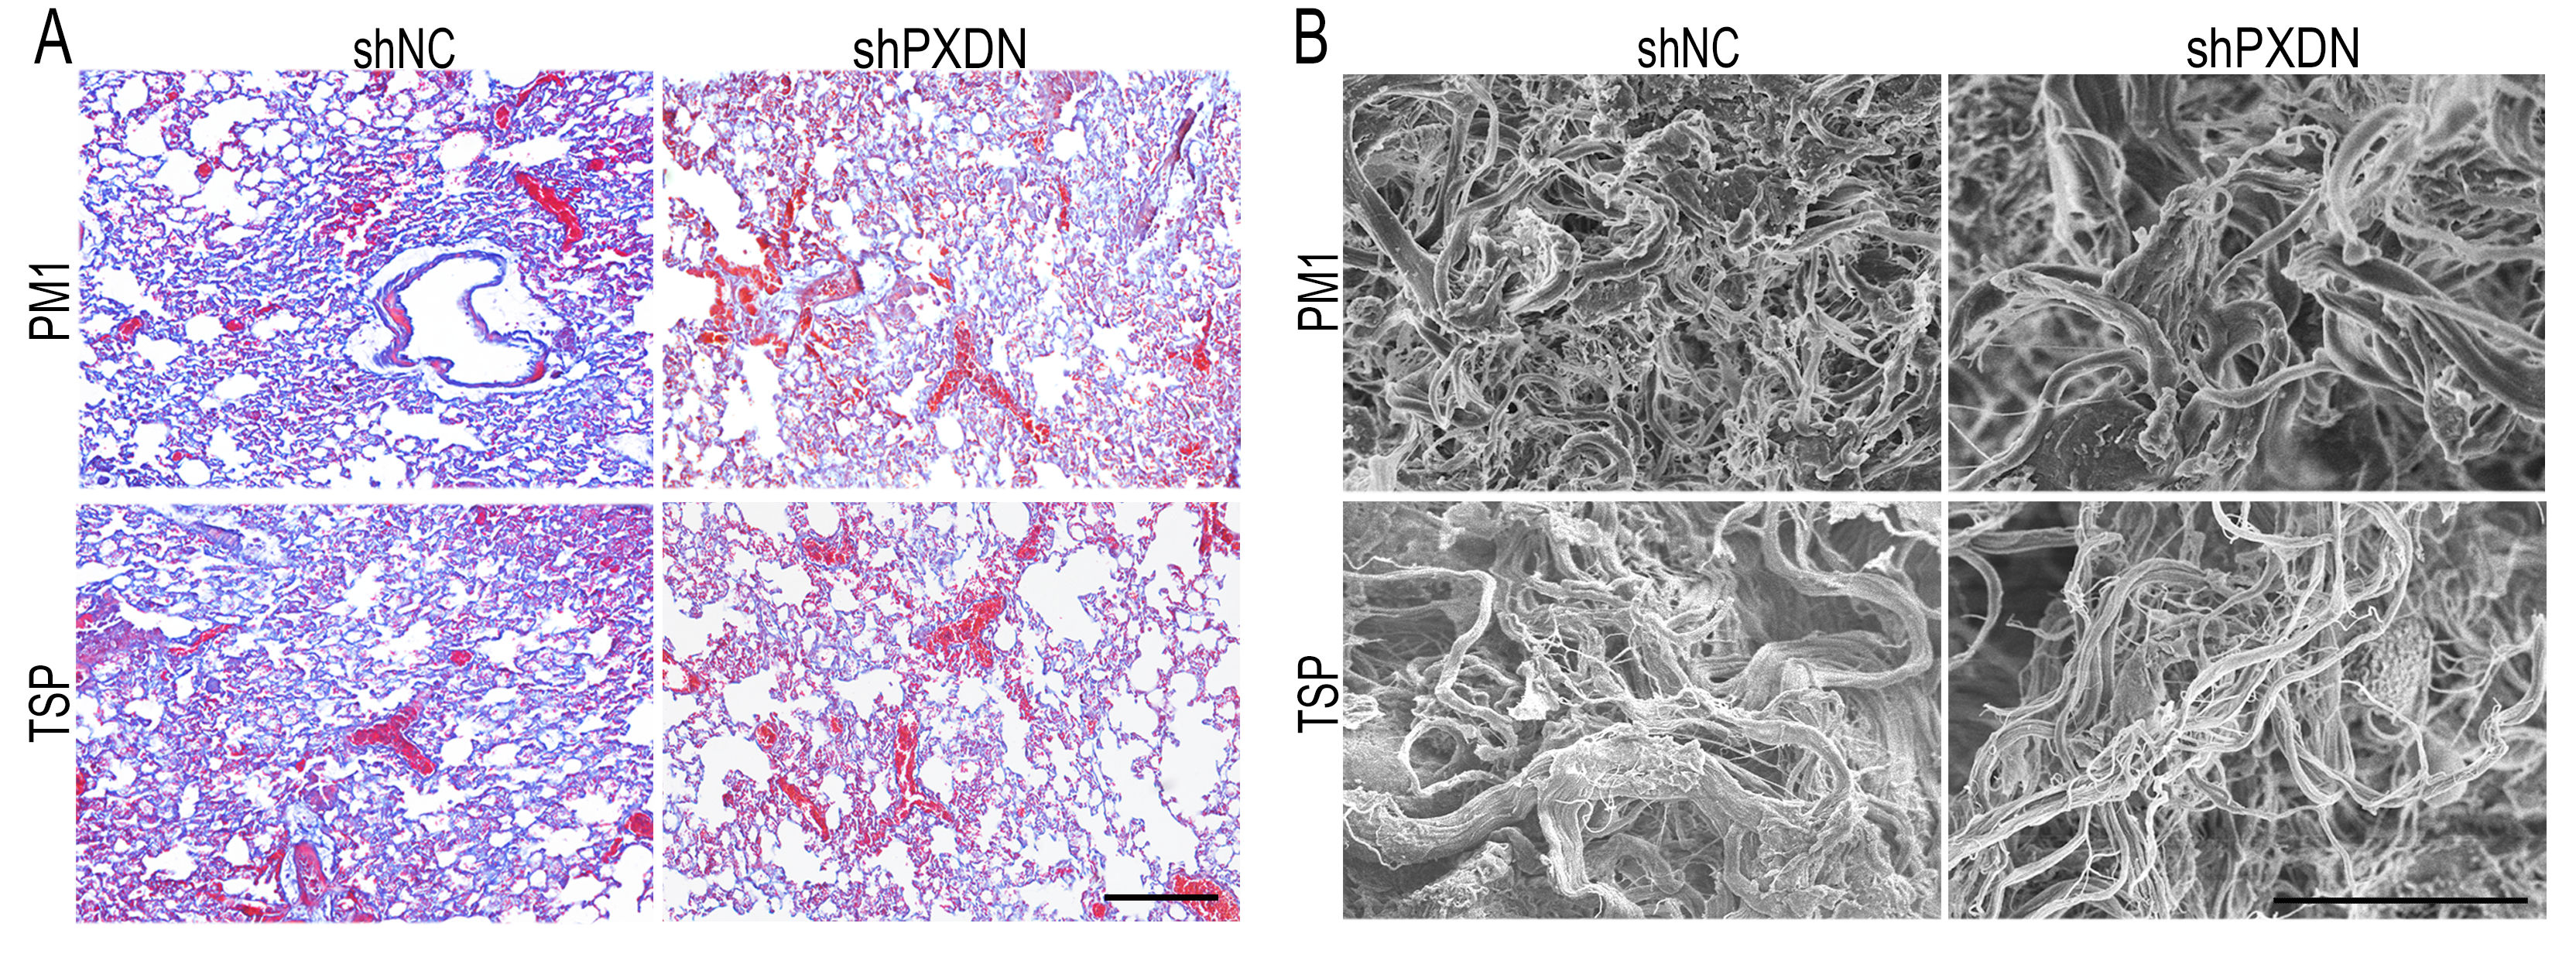

Supplement: supp [file elife-75345-supp-v1.zip › elife_poa_e75345_Figure_5_figure_supplement_3.tif]

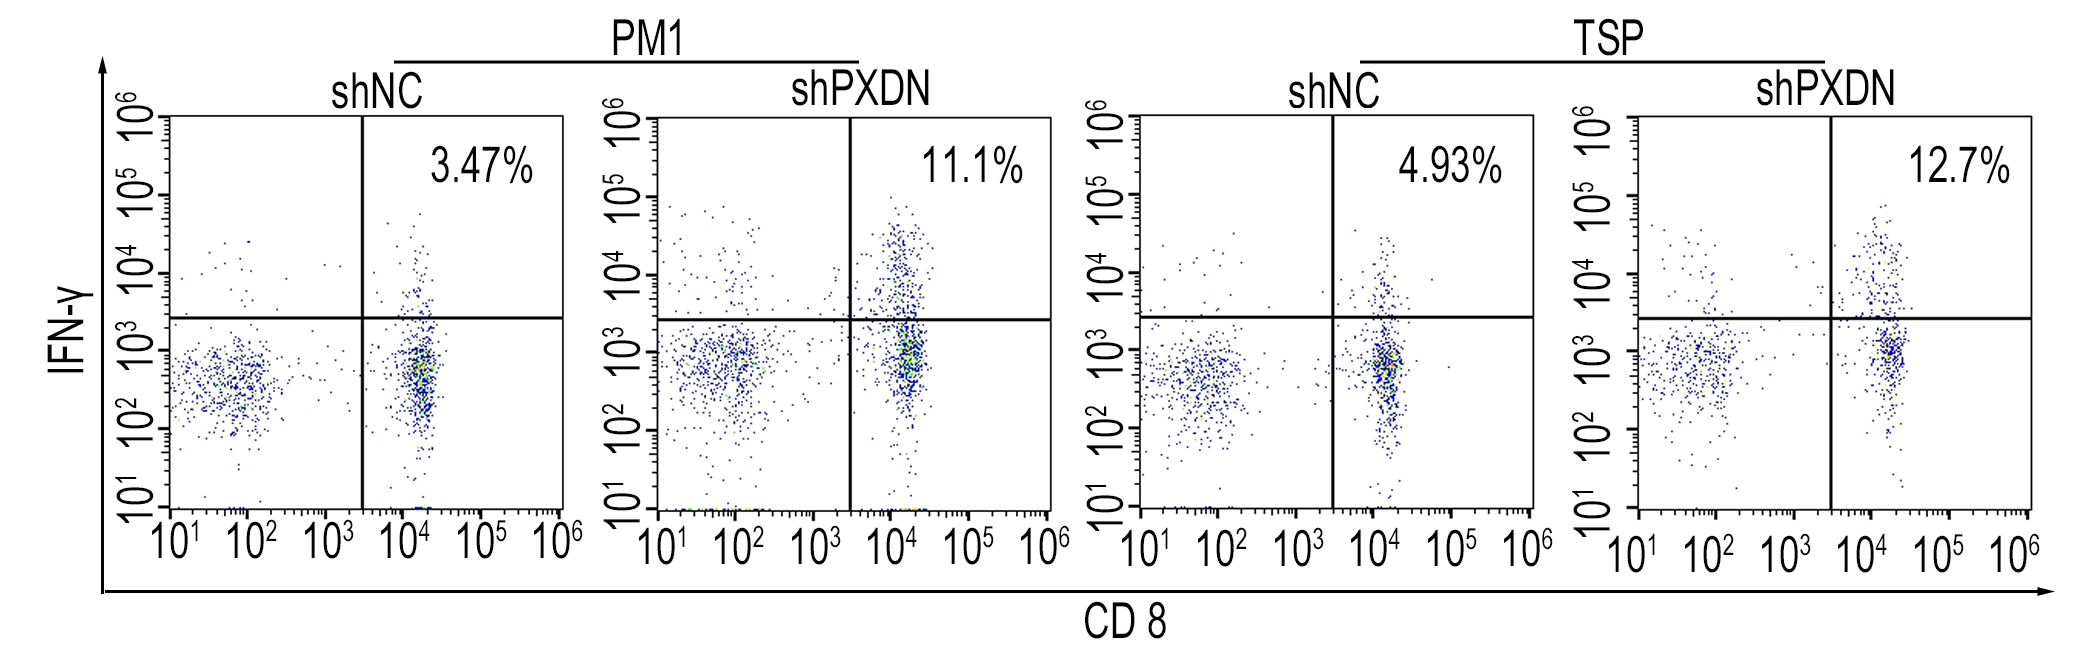

Supplement: supp [file elife-75345-supp-v1.zip › elife_poa_e75345_Figure_5_figure_supplement_4.tif]

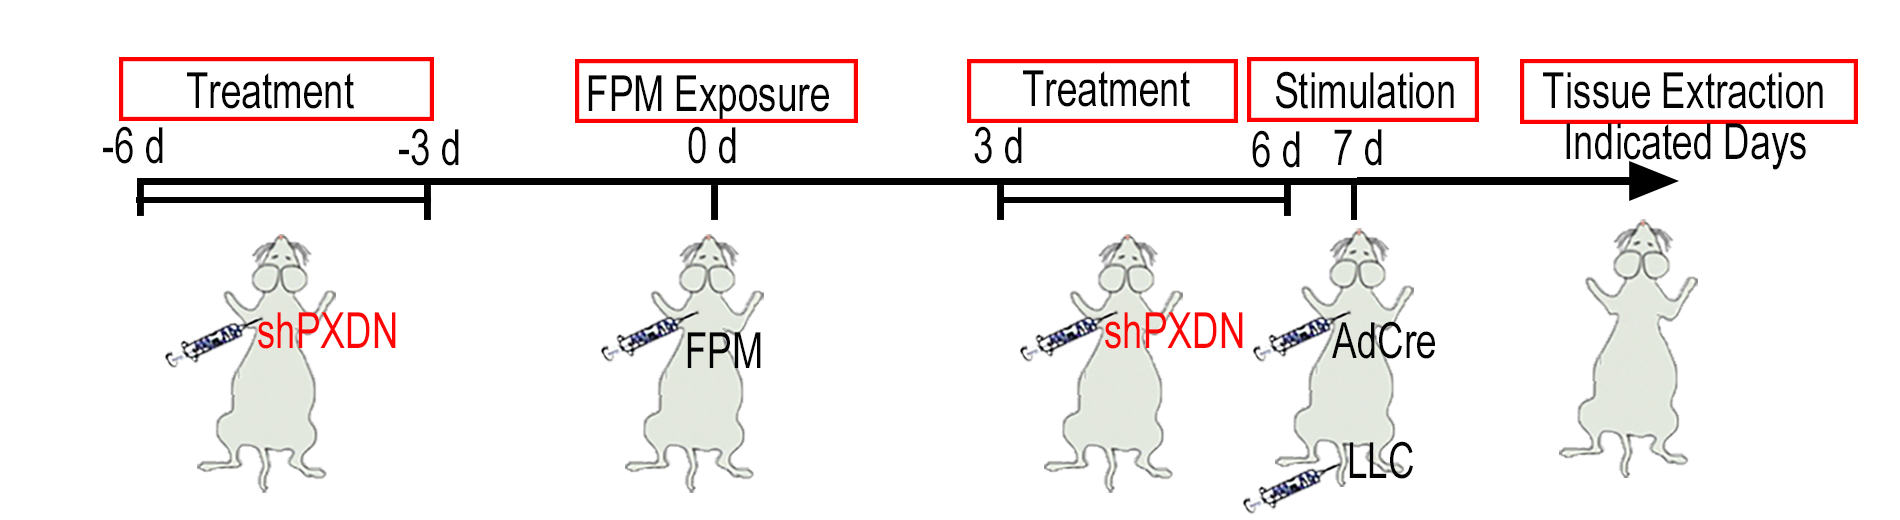

Supplement: supp [file elife-75345-supp-v1.zip › elife_poa_e75345_Figure_5_figure_supplement_5.tif]

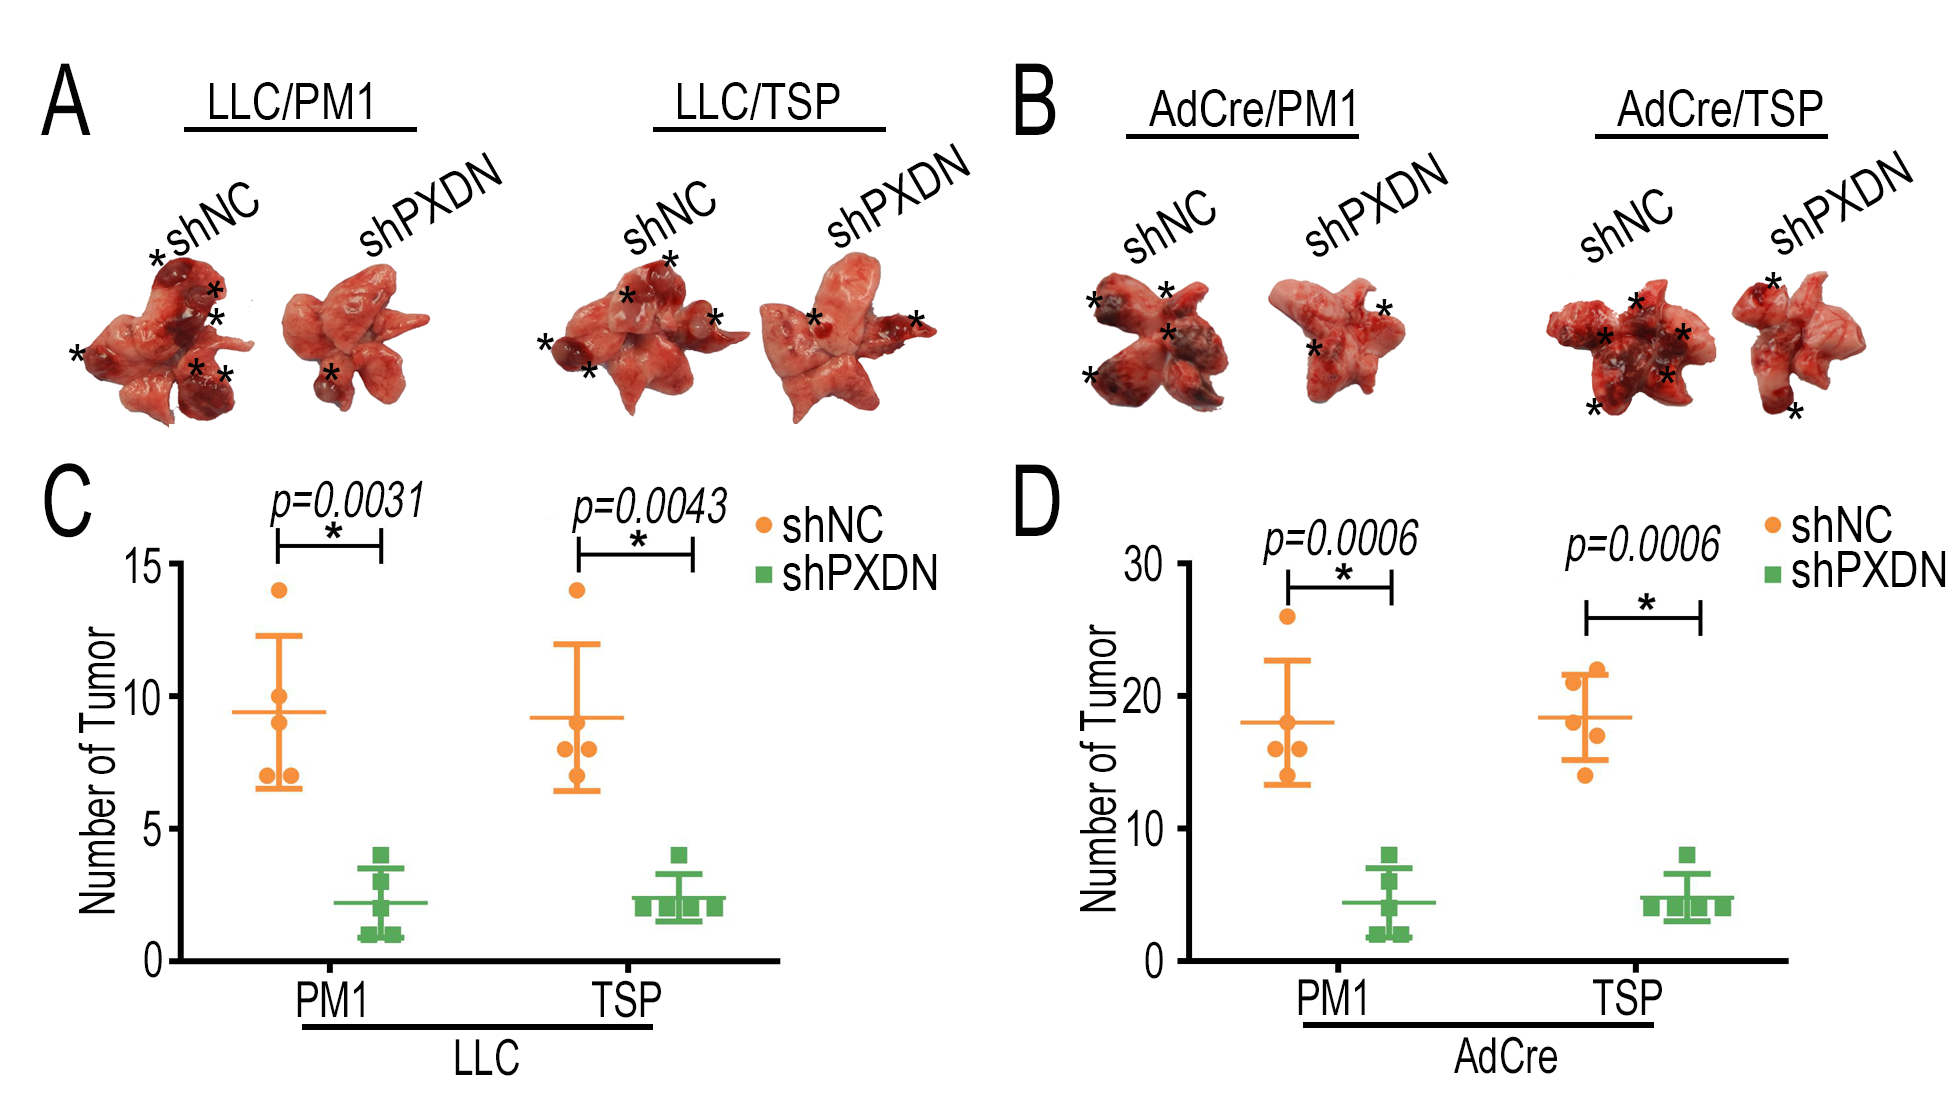

Supplement: supp [file elife-75345-supp-v1.zip › elife_poa_e75345_Figure_5_figure_supplement_6.tif]

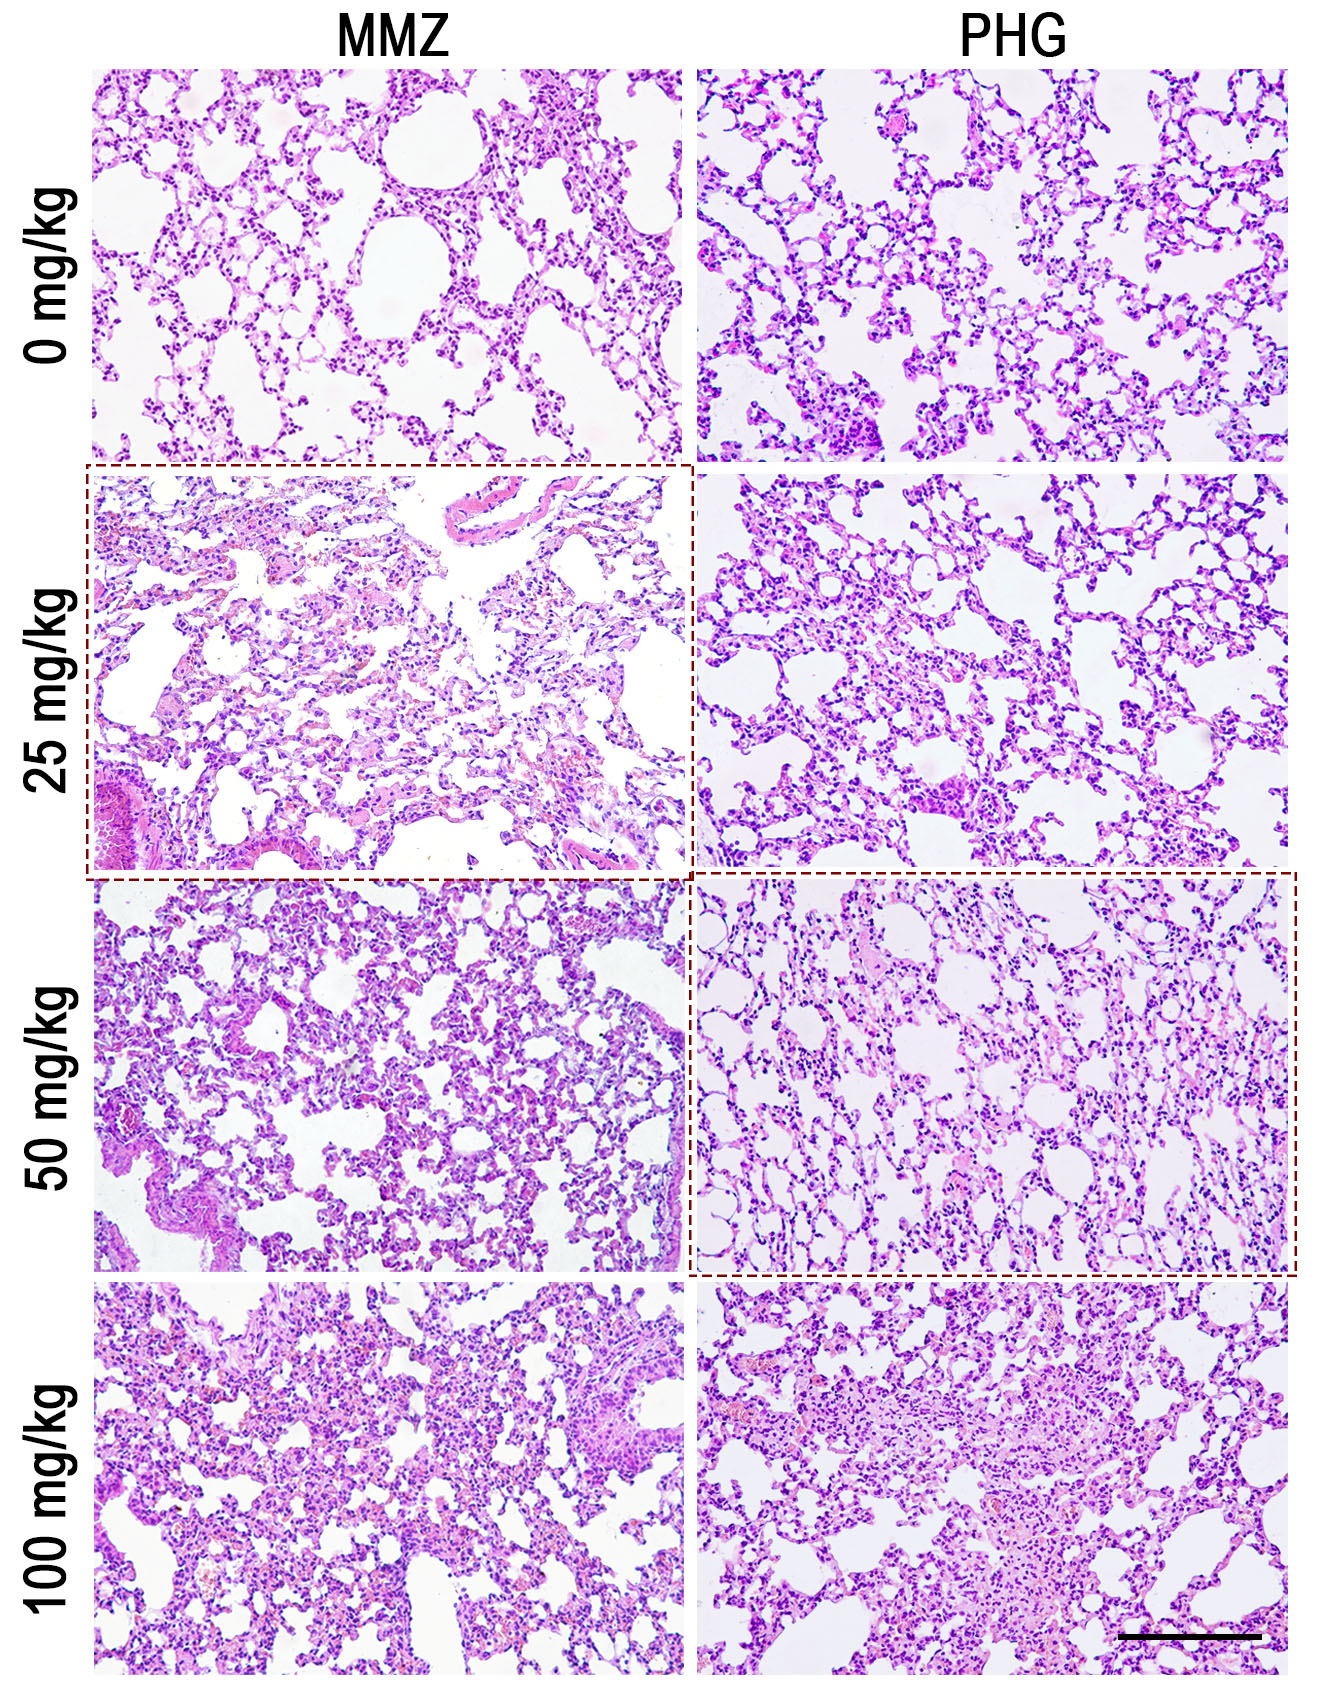

Supplement: supp [file elife-75345-supp-v1.zip › elife_poa_e75345_Figure_5_figure_supplement_7.jpg]

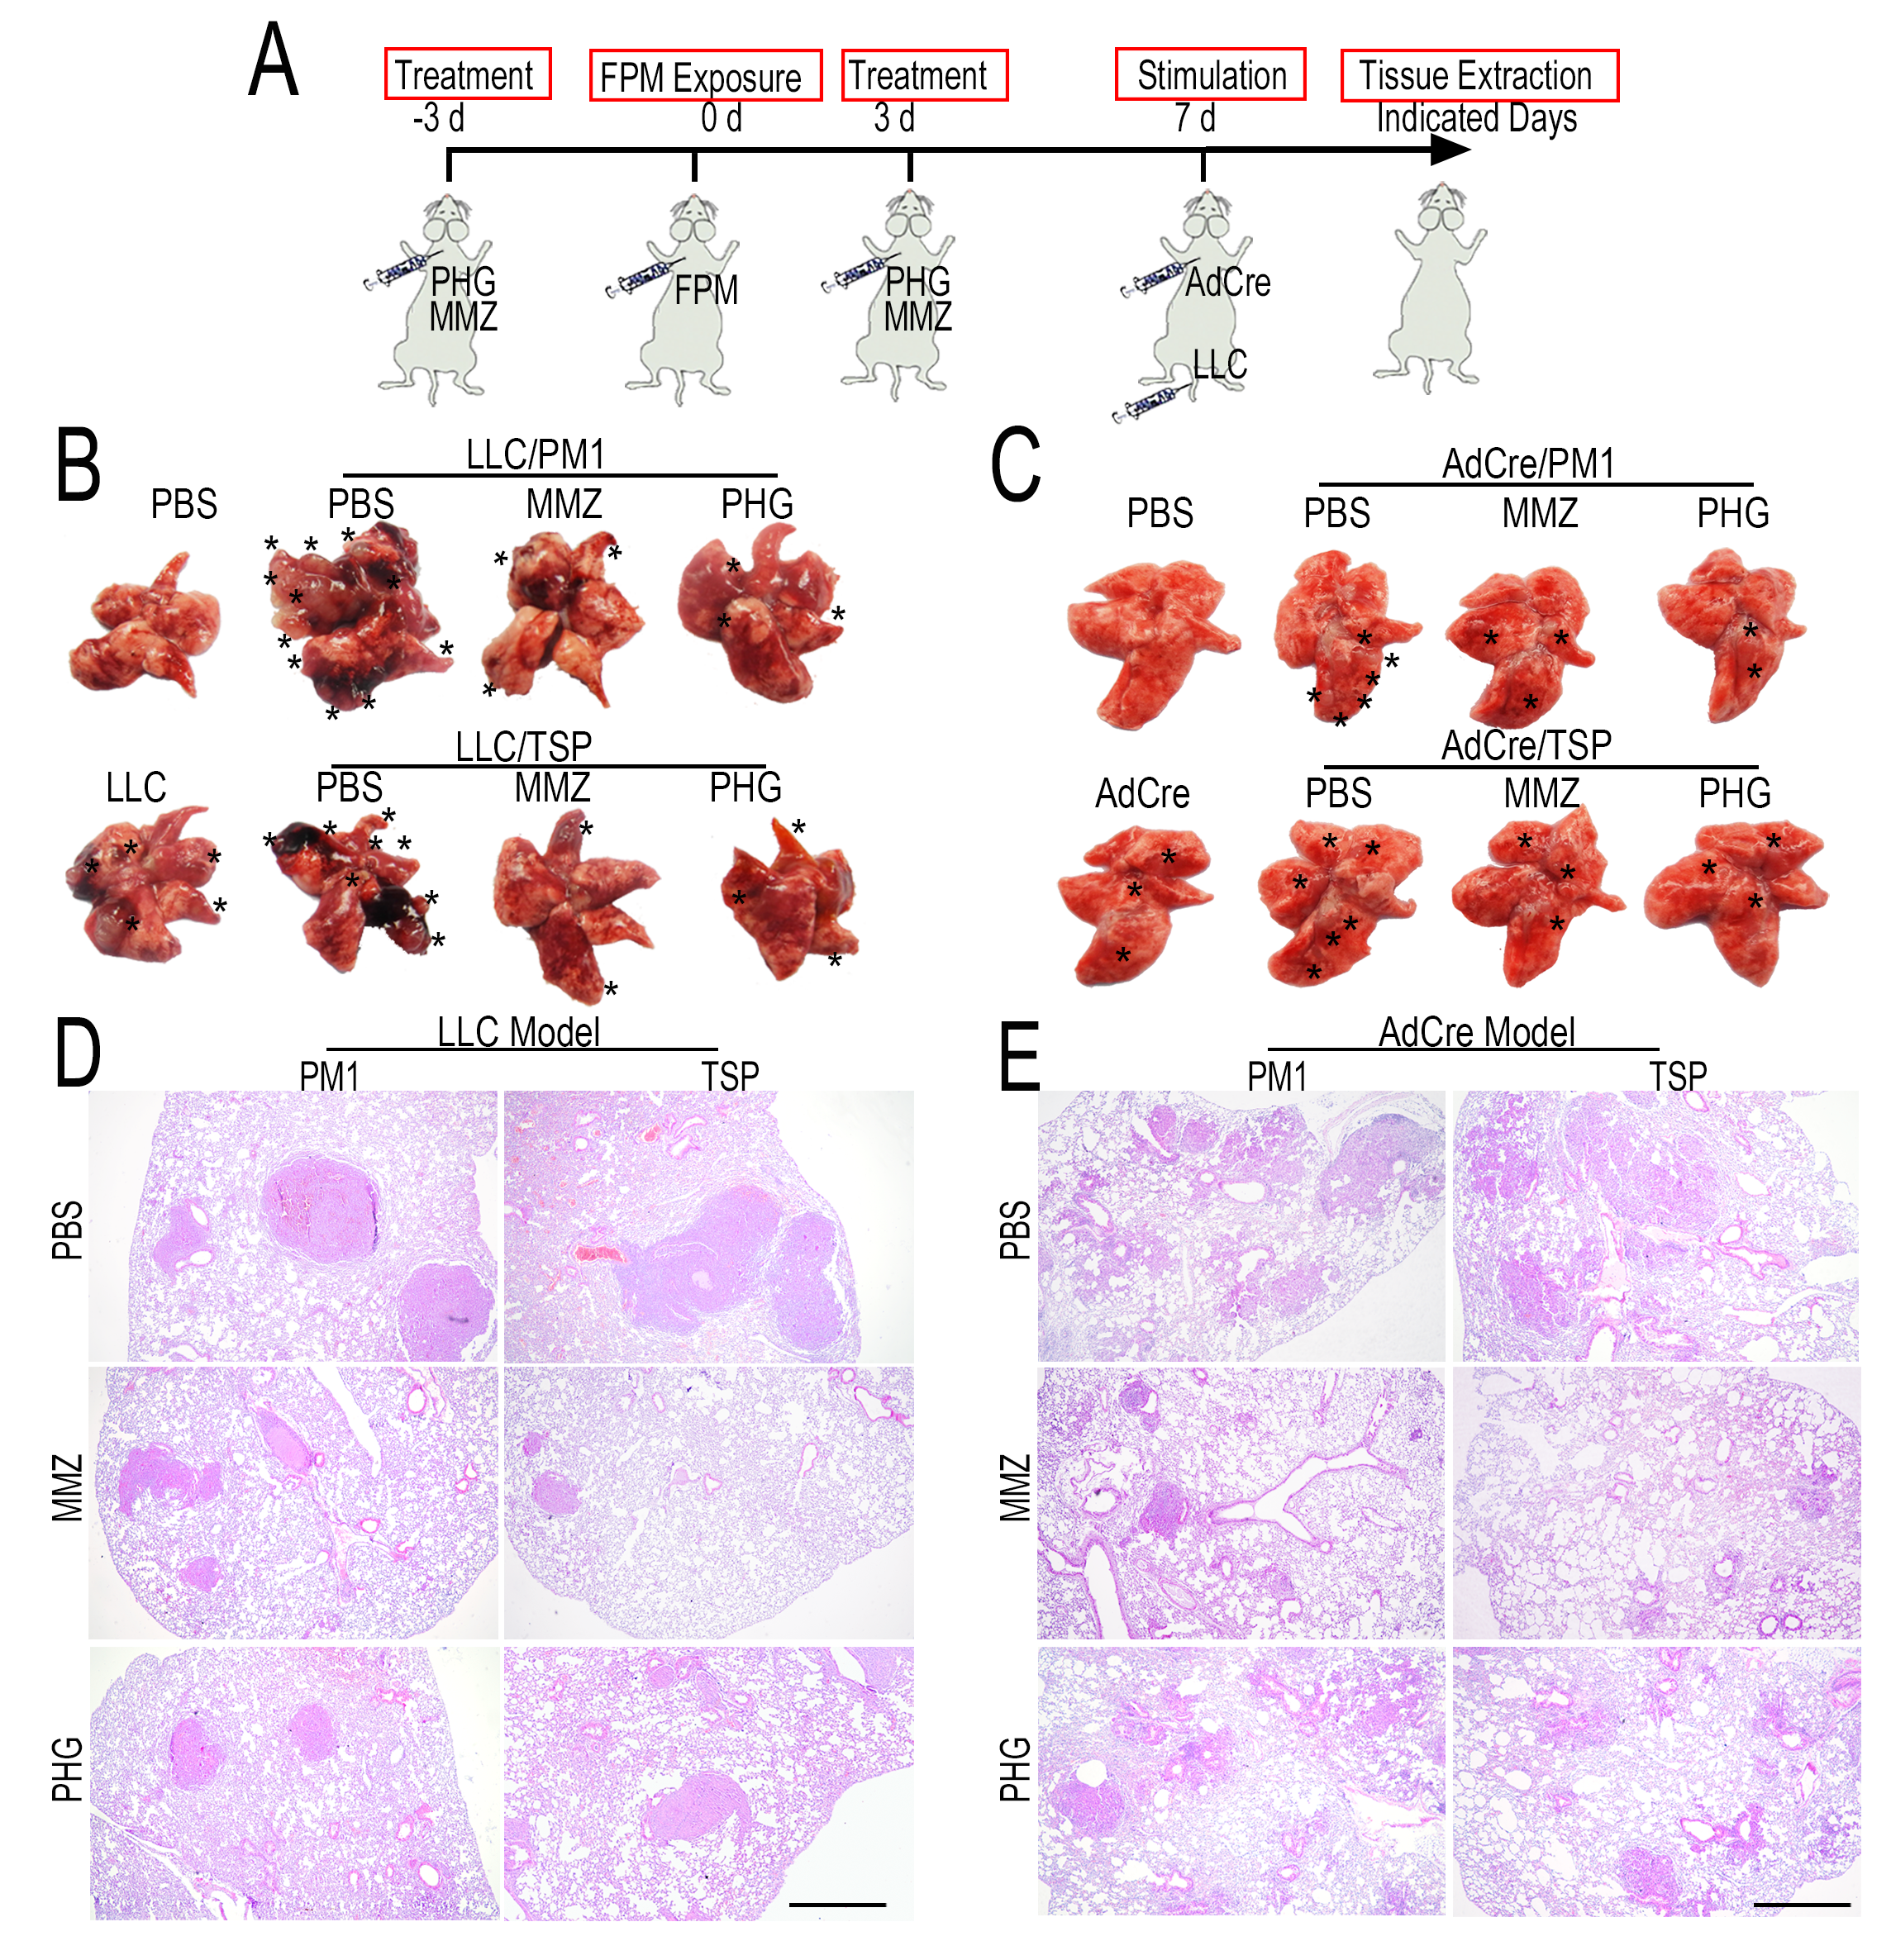

Supplement: supp [file elife-75345-supp-v1.zip › elife_poa_e75345_Figure_5_figure_supplement_8.tif]
